# Supplementary material for: Facile synthesis of fully substituted 1H-imidazoles from oxime esters via dual photoredox/copper catalyzed multicomponent reactions
Source: Royal Society of Chemistry journal article supplement (doi:10.1039/d2qo01475k), 2022-01-01
Supplement: d2qo01475k1.pdf [file d2qo01475k1.pdf]

**Facile synthesis of fully substituted 1*H*-imidazoles from oxime esters via dual photoredox/copper catalyzed multicomponent reactions**

Shujun Cao, Chongchong Ma, Xinjie Teng, Rongshun Chen\*, Yun Li, Weidong Yuan, and Yingguang Zhu\*

*Jiangsu Key Laboratory of Pesticide Science and Department of Chemistry, College of Sciences, Nanjing Agricultural University, Nanjing 210095, China*

\*E-mail: rongshunchen@njau.edu.cn; ygzhu@njau.edu.cn

**Supporting Information**

**Table of Contents**

|                                                                                              |     |
|----------------------------------------------------------------------------------------------|-----|
| <b>1.General information</b> .....                                                           | S2  |
| <b>2.Optimization of reaction conditions</b> .....                                           | S2  |
| <b>3.General procedure for the synthesis of fully substituted 1<i>H</i>-imidazoles</b> ..... | S4  |
| <b>4.Mechanistic studies</b> .....                                                           | S4  |
| 4.1 The experiment in the absence of Ir(ppy) <sub>3</sub> .....                              | S4  |
| 4.2 The experiment of the addition of radical scavenger TEMPO.....                           | S5  |
| 4.3 The experiment of the addition of radical scavenger BHT.....                             | S5  |
| 4.4 The possible reaction between compounds <b>5a-d</b> , <b>2a</b> , and <b>3a</b> .....    | S6  |
| 4.5 Intermediates trapping experiments.....                                                  | S7  |
| 4.6 Fluorescence quenching experiments.....                                                  | S9  |
| 4.7 Light on/off experiments.....                                                            | S10 |
| 4.8 Cyclic voltammetry experiments.....                                                      | S11 |
| <b>5.Characterization data</b> .....                                                         | S12 |
| <b>6.X-ray structure of product 4k</b> .....                                                 | S33 |
| <b>7.References</b> .....                                                                    | S34 |
| <b>8.NMR spectra</b> .....                                                                   | S35 |

**1. General information.** All commercially available reagents were used without further purification. Column chromatography was performed on silica gel (200-300 mesh).  $^1\text{H}$  NMR (400 MHz) and  $^{13}\text{C}$  NMR (100 MHz) spectra were recorded on a 400 MHz NMR spectrometer.  $^1\text{H}$  NMR (500 MHz) and  $^{13}\text{C}$  NMR (126 MHz) spectra were recorded on a 500 MHz NMR spectrometer. Chemical shifts ( $\delta$ ) were reported in ppm, and coupling constants ( $J$ ) were given in Hertz (Hz). Data were reported as s = singlet, d = doublet, t = triplet, q = quartet, dd = doublet of doublets, m = multiplet. High-resolution mass spectra (HRMS) were recorded on an AB SCIEX Triple TOF 5600+ mass spectrometer. Melting points were uncorrected. Substrates **1a–1o** were prepared according to the literature procedure.<sup>1</sup>

## 2. Optimization of reaction conditions

**Table S1. Optimization of Reaction Conditions<sup>a</sup>**

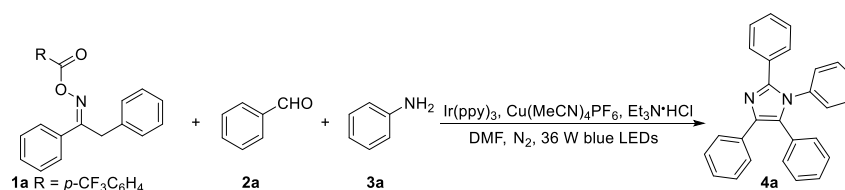

| En try | PC                                                                                                  | [Cu]                                  | Additive              | Solvent | Yield [%] |
|--------|-----------------------------------------------------------------------------------------------------|---------------------------------------|-----------------------|---------|-----------|
| 1      | Ir(dF(CF <sub>3</sub> )ppy <sub>2</sub> )dtbbpyPF <sub>6</sub>                                      | CuCN                                  | Et <sub>3</sub> N HCl | DMF     | 0         |
| 2      | Ir(ppy <sub>2</sub> dtbbpy)PF <sub>6</sub>                                                          | CuCN                                  | Et <sub>3</sub> N HCl | DMF     | 0         |
| 3      | Ir(dF(CF <sub>3</sub> )ppy <sub>2</sub> (5,5-dF(CF <sub>3</sub> )bpy <sub>2</sub> ))PF <sub>6</sub> | CuCN                                  | Et <sub>3</sub> N HCl | DMF     | 0         |
| 4      | Ir(dF(CF <sub>3</sub> )ppy <sub>2</sub> bpy)PF <sub>6</sub>                                         | CuCN                                  | Et <sub>3</sub> N HCl | DMF     | 0         |
| 5      | Ir(ppy) <sub>3</sub>                                                                                | CuCN                                  | Et <sub>3</sub> N HCl | DMF     | 51        |
| 6      | 4CzIPN                                                                                              | CuCN                                  | Et <sub>3</sub> N HCl | DMF     | 0         |
| 7      | 4DPAIPN                                                                                             | CuCN                                  | Et <sub>3</sub> N HCl | DMF     | 0         |
| 8      | Acr-Mes <sup>+</sup> ClO <sub>4</sub> <sup>-</sup>                                                  | CuCN                                  | Et <sub>3</sub> N HCl | DMF     | 0         |
| 9      | Eosin Y                                                                                             | CuCN                                  | Et <sub>3</sub> N HCl | DMF     | 0         |
| 10     | Rhodamine B                                                                                         | CuCN                                  | Et <sub>3</sub> N HCl | DMF     | 0         |
| 11     | Rose begal                                                                                          | CuCN                                  | Et <sub>3</sub> N HCl | DMF     | 0         |
| 12     | Methylene blue                                                                                      | CuCN                                  | Et <sub>3</sub> N HCl | DMF     | 0         |
| 13     | Ir(ppy) <sub>3</sub>                                                                                | CuBr                                  | Et <sub>3</sub> N HCl | DMF     | 81        |
| 14     | Ir(ppy) <sub>3</sub>                                                                                | CuCl                                  | Et <sub>3</sub> N HCl | DMF     | 79        |
| 15     | Ir(ppy) <sub>3</sub>                                                                                | CuI                                   | Et <sub>3</sub> N HCl | DMF     | 77        |
| 16     | Ir(ppy) <sub>3</sub>                                                                                | Cu(MeCN) <sub>4</sub> PF <sub>6</sub> | Et <sub>3</sub> N HCl | DMF     | 90        |
| 17     | Ir(ppy) <sub>3</sub>                                                                                | CuSCN                                 | Et <sub>3</sub> N HCl | DMF     | 41        |
| 18     | Ir(ppy) <sub>3</sub>                                                                                | CuTc                                  | Et <sub>3</sub> N HCl | DMF     | 48        |

|                 |                      |                                       |                                  |         |    |
|-----------------|----------------------|---------------------------------------|----------------------------------|---------|----|
| 19              | Ir(ppy) <sub>3</sub> | Cu(OAc)                               | Et <sub>3</sub> N HCl            | DMF     | 82 |
| 20              | Ir(ppy) <sub>3</sub> | Cu(OTf)                               | Et <sub>3</sub> N HCl            | DMF     | 73 |
| 21              | Ir(ppy) <sub>3</sub> | Cu(OAc) <sub>2</sub>                  | Et <sub>3</sub> N HCl            | DMF     | 48 |
| 22              | Ir(ppy) <sub>3</sub> | Cu(OTf) <sub>2</sub>                  | Et <sub>3</sub> N HCl            | DMF     | 46 |
| 23              | Ir(ppy) <sub>3</sub> | Cu(acac) <sub>2</sub>                 | Et <sub>3</sub> N HCl            | DMF     | 49 |
| 24              | Ir(ppy) <sub>3</sub> | Cu(NO <sub>3</sub> ) <sub>2</sub>     | Et <sub>3</sub> N HCl            | DMF     | 37 |
| 25              | Ir(ppy) <sub>3</sub> | CuCl <sub>2</sub>                     | Et <sub>3</sub> N HCl            | DMF     | 53 |
| 26              | Ir(ppy) <sub>3</sub> | CuBr <sub>2</sub>                     | Et <sub>3</sub> N HCl            | DMF     | 52 |
| 27              | Ir(ppy) <sub>3</sub> | Cu(MeCN) <sub>4</sub> PF <sub>6</sub> | Et <sub>3</sub> N                | DMF     | 60 |
| 28              | Ir(ppy) <sub>3</sub> | Cu(MeCN) <sub>4</sub> PF <sub>6</sub> | Cs <sub>2</sub> CO <sub>3</sub>  | DMF     | 0  |
| 29              | Ir(ppy) <sub>3</sub> | Cu(MeCN) <sub>4</sub> PF <sub>6</sub> | Na <sub>2</sub> CO <sub>3</sub>  | DMF     | 53 |
| 30              | Ir(ppy) <sub>3</sub> | Cu(MeCN) <sub>4</sub> PF <sub>6</sub> | K <sub>2</sub> CO <sub>3</sub>   | DMF     | 70 |
| 31              | Ir(ppy) <sub>3</sub> | Cu(MeCN) <sub>4</sub> PF <sub>6</sub> | Na <sub>2</sub> HPO <sub>4</sub> | DMF     | 57 |
| 32              | Ir(ppy) <sub>3</sub> | Cu(MeCN) <sub>4</sub> PF <sub>6</sub> | K <sub>2</sub> HPO <sub>4</sub>  | DMF     | 40 |
| 33              | Ir(ppy) <sub>3</sub> | Cu(MeCN) <sub>4</sub> PF <sub>6</sub> | NaHCO <sub>3</sub>               | DMF     | 74 |
| 34              | Ir(ppy) <sub>3</sub> | Cu(MeCN) <sub>4</sub> PF <sub>6</sub> | NaH <sub>2</sub> PO <sub>4</sub> | DMF     | 35 |
| 35              | Ir(ppy) <sub>3</sub> | Cu(MeCN) <sub>4</sub> PF <sub>6</sub> | TFA                              | DMF     | 0  |
| 36              | Ir(ppy) <sub>3</sub> | Cu(MeCN) <sub>4</sub> PF <sub>6</sub> | TMG                              | DMF     | 30 |
| 37              | Ir(ppy) <sub>3</sub> | Cu(MeCN) <sub>4</sub> PF <sub>6</sub> | Et <sub>3</sub> N HCl            | DMA     | 60 |
| 38              | Ir(ppy) <sub>3</sub> | Cu(MeCN) <sub>4</sub> PF <sub>6</sub> | Et <sub>3</sub> N HCl            | DMSO    | 73 |
| 39              | Ir(ppy) <sub>3</sub> | Cu(MeCN) <sub>4</sub> PF <sub>6</sub> | Et <sub>3</sub> N HCl            | MeCN    | 71 |
| 40              | Ir(ppy) <sub>3</sub> | Cu(MeCN) <sub>4</sub> PF <sub>6</sub> | Et <sub>3</sub> N HCl            | Dioxane | 0  |
| 41              | Ir(ppy) <sub>3</sub> | Cu(MeCN) <sub>4</sub> PF <sub>6</sub> | Et <sub>3</sub> N HCl            | DCE     | 53 |
| 42              | Ir(ppy) <sub>3</sub> | Cu(MeCN) <sub>4</sub> PF <sub>6</sub> | Et <sub>3</sub> N HCl            | MeOH    | 0  |
| 43              | Ir(ppy) <sub>3</sub> | Cu(MeCN) <sub>4</sub> PF <sub>6</sub> | Et <sub>3</sub> N HCl            | NMP     | 36 |
| 44              | Ir(ppy) <sub>3</sub> | Cu(MeCN) <sub>4</sub> PF <sub>6</sub> | Et <sub>3</sub> N HCl            | EA      | 59 |
| 45              | Ir(ppy) <sub>3</sub> | Cu(MeCN) <sub>4</sub> PF <sub>6</sub> | Et <sub>3</sub> N HCl            | THF     | 3  |
| 46              | Ir(ppy) <sub>3</sub> | Cu(MeCN) <sub>4</sub> PF <sub>6</sub> | Et <sub>3</sub> N HCl            | toluene | 36 |
| 47              | -                    | Cu(MeCN) <sub>4</sub> PF <sub>6</sub> | Et <sub>3</sub> N HCl            | DMF     | 0  |
| 48              | Ir(ppy) <sub>3</sub> | -                                     | Et <sub>3</sub> N HCl            | DMF     | 0  |
| 49              | Ir(ppy) <sub>3</sub> | Cu(MeCN) <sub>4</sub> PF <sub>6</sub> | -                                | DMF     | 50 |
| 50 <sup>c</sup> | Ir(ppy) <sub>3</sub> | Cu(MeCN) <sub>4</sub> PF <sub>6</sub> | Et <sub>3</sub> N HCl            | DMF     | 0  |
| 51 <sup>d</sup> | Ir(ppy) <sub>3</sub> | Cu(MeCN) <sub>4</sub> PF <sub>6</sub> | Et <sub>3</sub> N HCl            | DMF     | 77 |
| 52 <sup>e</sup> | Ir(ppy) <sub>3</sub> | Cu(MeCN) <sub>4</sub> PF <sub>6</sub> | Et <sub>3</sub> N HCl            | DMF     | 19 |

<sup>a</sup>All reactions were carried out with **1a** (76.6 mg, 0.20 mmol), **2a** (42.4 mg, 0.40 mmol, 2.0 equiv), **3a** (37.2 mg, 0.40 mmol, 2.0 equiv), photocatalyst (0.0020 mmol), copper catalyst (0.020 mmol), additive (0.40 mmol, 2 equiv) in solvent (2.0 mL) at room temperature under N<sub>2</sub> for 24 h under irradiation with a 15 W blue LED lamp unless otherwise stated. <sup>b</sup>Isolated yield based on **1a**. <sup>c</sup>The reaction was conducted in the dark. <sup>d</sup>In the air atmosphere. <sup>e</sup>18 W CFL lamp was used. Cu(acac)<sub>2</sub> = cupric acetylacetonate. CuTC = copper(I) thiophene-2-carboxylate. NEt<sub>3</sub> = triethylamine, TMG = tetramethylguanidine, DCE = dichloroethane, DMF = *N,N*-dimethylformamide.

**3. General procedure for the synthesis of fully substituted 1*H*-imidazoles (Scheme 2 and Scheme 3).** To a reaction tube equipped with a magnetic stir bar were added oxime ester **1** (0.20 mmol), aldehyde **2** (0.40 mmol), amine **3** (0.40 mmol), Ir(ppy)<sub>3</sub> (1.3 mg, 0.0020 mmol), Cu(MeCN)<sub>4</sub>PF<sub>6</sub> (7.5 mg, 0.020 mmol), Et<sub>3</sub>N HCl (55.2 mg, 0.40 mmol), and DMF (2.0 mL). The reaction mixture was irradiated with a 15 W blue LED lamp and stirred at 25 °C under nitrogen atmosphere for 24 h. After that, the mixture was diluted with water (15 mL) and extracted with EtOAc (15 mL×3). The combined organic layers were washed with brine, dried over Na<sub>2</sub>SO<sub>4</sub>, filtered, and concentrated under reduced pressure. The residue was purified by column chromatography on silica gel (eluent: petroleum ether/ethyl acetate = 40:1 ~ 10:1) to give products **4**.

#### 4. Mechanistic studies

##### 4.1 The experiment in the absence of Ir(ppy)<sub>3</sub>

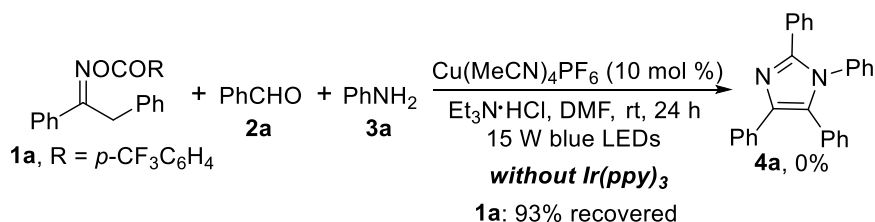

To a reaction tube equipped with a magnetic stir bar were added oxime ester **1a** (76.6 mg, 0.20 mmol), aldehyde **2a** (42.4 mg, 0.40 mmol), amine **3a** (37.3 mg, 0.40 mmol), Cu(MeCN)<sub>4</sub>PF<sub>6</sub> (7.5 mg, 0.020 mmol), Et<sub>3</sub>N HCl (55.2 mg, 0.40 mmol), and DMF (2.0 mL). The reaction mixture was irradiated with a 15 W blue LED lamp and stirred at 25 °C under nitrogen atmosphere for 24 h. Thin-layer chromatography (TLC) analysis indicated that the formation of product **3a** was not observed. After that, the mixture was diluted with water (15 mL) and extracted with EtOAc (15 mL×3). The combined organic layers were washed with H<sub>2</sub>O, brine, dried over Na<sub>2</sub>SO<sub>4</sub>, filtered, and concentrated under reduced pressure. The residue was purified by column chromatography on silica gel (eluent: petroleum ether/ethyl acetate = 20:1) to afford the recovered oxime ester **1a** (71.5 mg, 93% recovered). Such results are not contradictory with previous reports about copper-mediated/catalyzed N-O bond

cleavage reactions of oxime esters, which need to be conducted under heating conditions.

#### 4.2 The experiment of the addition of radical scavenger TEMPO

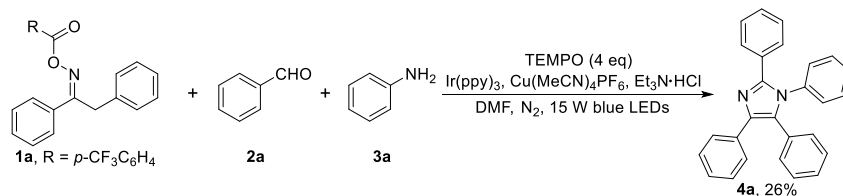

To a reaction tube equipped with a magnetic stir bar were added oxime ester **1a** (76.6 mg, 0.20 mmol), aldehyde **2a** (42.4 mg, 0.40 mmol), amine **3a** (37.3 mg, 0.40 mmol), Ir(ppy)<sub>3</sub> (1.3 mg, 0.0020 mmol), Cu(MeCN)<sub>4</sub>PF<sub>6</sub> (7.5 mg, 0.020 mmol), Et<sub>3</sub>N HCl (55.2 mg, 0.40 mmol), TEMPO (125.0 mg, 0.80 mmol), and DMF (2.0 mL). The reaction mixture was irradiated with a 15 W blue LED lamp and stirred at 25 °C under nitrogen atmosphere for 24 h. Afterwards, the mixture was diluted with water (15 mL) and extracted with EtOAc (15 mL × 3). The combined organic layers were washed with brine, dried over Na<sub>2</sub>SO<sub>4</sub>, filtered, and concentrated under reduced pressure. The residue was purified by column chromatography on silica gel (eluent: petroleum ether/ethyl acetate = 20:1) to give product **4a** (19.3 mg, 26%).

#### 4.3 The experiment of the addition of radical scavenger BHT

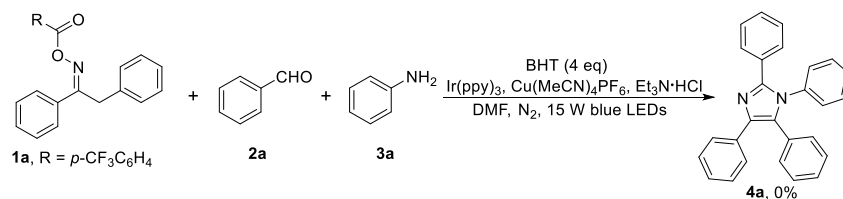

To a reaction tube equipped with a magnetic stir bar were added oxime ester **1a** (76.6 mg, 0.20 mmol), aldehyde **2a** (42.4 mg, 0.40 mmol), amine **3a** (37.3 mg, 0.40 mmol), Ir(ppy)<sub>3</sub> (1.3 mg, 0.0020 mmol), Cu(MeCN)<sub>4</sub>PF<sub>6</sub> (7.5 mg, 0.020 mmol), Et<sub>3</sub>N HCl (55.2 mg, 0.40 mmol), BHT (176.3 mg, 0.80 mmol), and DMF (2.0 mL). The reaction mixture was irradiated with a 15 W blue LED lamp and stirred at 25 °C under nitrogen atmosphere for 24 h. Thin-layer chromatography (TLC) analysis indicated that the formation of product **4a** was not observed.

#### 4.4 The possible reaction between compounds 5a-d, aldehyde 2a, and amine 3a

##### 4.4.1 The possible reaction between 2,3-diphenyl-2H-azirine (5a), aldehyde 2a, and amine 3a

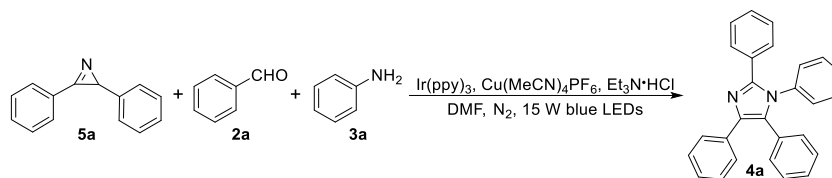

To a reaction tube equipped with a magnetic stir bar were added azirine **5a** (38.6 mg, 0.20 mmol), aldehyde **2a** (42.4 mg, 0.40 mmol), amine **3a** (37.3 mg, 0.40 mmol), Ir(ppy)<sub>3</sub> (1.3 mg, 0.0020 mmol), Cu(MeCN)<sub>4</sub>PF<sub>6</sub> (7.5 mg, 0.020 mmol), Et<sub>3</sub>N HCl (55.2 mg, 0.40 mmol), and DMF (2.0 mL). The reaction mixture was irradiated with a 15 W blue LED lamp and stirred at 25 °C under nitrogen atmosphere for 24 h. Thin-layer chromatography (TLC) analysis indicated that the formation of product **4a** was not observed.

##### 4.4.2 The possible reaction between 1,2-diphenylethan-1-one (5b), aldehyde 2a, and amine 3a

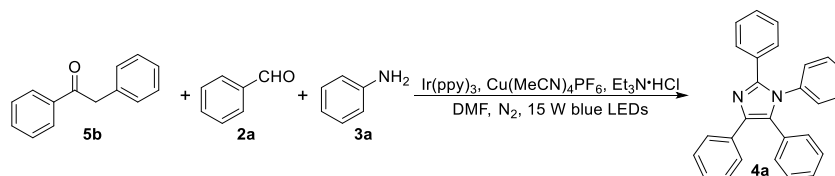

To a reaction tube equipped with a magnetic stir bar were added azirine **5b** (39.2 mg, 0.20 mmol), aldehyde **2a** (42.4 mg, 0.40 mmol), amine **3a** (37.3 mg, 0.40 mmol), Ir(ppy)<sub>3</sub> (1.3 mg, 0.0020 mmol), Cu(MeCN)<sub>4</sub>PF<sub>6</sub> (7.5 mg, 0.020 mmol), Et<sub>3</sub>N HCl (55.2 mg, 0.40 mmol), and DMF (2.0 mL). The reaction mixture was irradiated with a 15 W blue LED lamp and stirred at 25 °C under nitrogen atmosphere for 24 h. Thin-layer chromatography (TLC) analysis indicated that the formation of product **4a** was not observed.

#### 4.4.3 The possible reaction between benzil (**5c**), aldehyde **2a**, and amine **3a** (Scheme 2d)

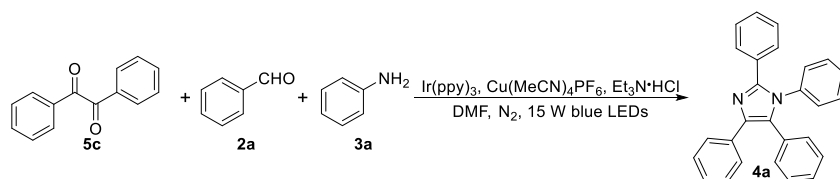

To a reaction tube equipped with a magnetic stir bar were added azirine **5c** (42.0 mg, 0.20 mmol), aldehyde **2a** (42.4 mg, 0.40 mmol), amine **3a** (37.3 mg, 0.40 mmol),  $\text{Ir(ppy)}_3$  (1.3 mg, 0.0020 mmol),  $\text{Cu(MeCN)}_4\text{PF}_6$  (7.5 mg, 0.020 mmol),  $\text{Et}_3\text{N HCl}$  (55.2 mg, 0.40 mmol), and DMF (2.0 mL). The reaction mixture was irradiated with a 15 W blue LED lamp and stirred at 25 °C under nitrogen atmosphere for 24 h. Thin-layer chromatography (TLC) analysis indicated that the formation of product **4a** was not observed.

#### 4.4.4 The possible reaction between 2-hydroxy-1,2-diphenylethan-1-one (**5d**) aldehyde **2a**, and amine **3a**

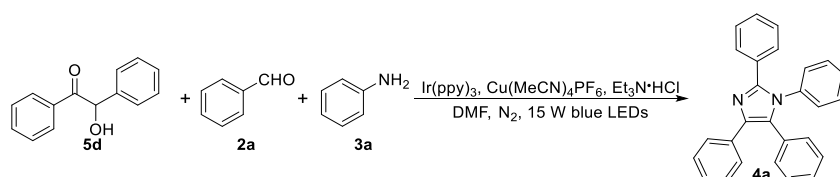

To a reaction tube equipped with a magnetic stir bar were added azirine **5d** (42.4 mg, 0.20 mmol), aldehyde **2a** (42.4 mg, 0.40 mmol), amine **3a** (37.3 mg, 0.40 mmol),  $\text{Ir(ppy)}_3$  (1.3 mg, 0.0020 mmol),  $\text{Cu(MeCN)}_4\text{PF}_6$  (7.5 mg, 0.020 mmol),  $\text{Et}_3\text{N HCl}$  (55.2 mg, 0.40 mmol), and DMF (2.0 mL). The reaction mixture was irradiated with a 15 W blue LED lamp and stirred at 25 °C under nitrogen atmosphere for 24 h. Thin-layer chromatography (TLC) analysis indicated that the formation of product **4a** was not observed.

#### 4.5 Intermediates trapping experiments

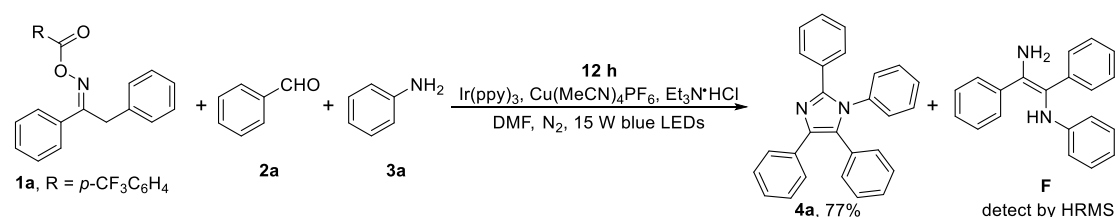

To a reaction tube equipped with a magnetic stir bar were added oxime ester **1a** (76.6 mg, 0.20 mmol), aldehyde **2a** (42.4 mg, 0.40 mmol), amine **3a** (37.3 mg, 0.40 mmol), Ir(ppy)<sub>3</sub> (1.3 mg, 0.0020 mmol), Cu(MeCN)<sub>4</sub>PF<sub>6</sub> (7.5 mg, 0.020 mmol), Et<sub>3</sub>N HCl (55.2 mg, 0.40 mmol), and DMF (2.0 mL). The reaction mixture was irradiated with a 15 W blue LED lamp and stirred at 25 °C under nitrogen atmosphere for 12 h. After that, a trace amount of the crude reaction mixture was subjected to the HRMS analysis, which indicated that the intermediates **F** could be formed. Afterwards, the mixture was diluted with water (15 mL) and extracted with EtOAc (15 mL×3). The combined organic layers were washed with brine, dried over Na<sub>2</sub>SO<sub>4</sub>, filtered, and concentrated under reduced pressure. The residue was purified by column chromatography on silica gel (eluent: petroleum ether/ethyl acetate = 20:1) to give product **4a** (57.1 mg, 77%).

Spectrum from 25.wiff (sample 1) - Sample025, Experiment 1, +TOF MS (50 - 1000) from 0.091 min

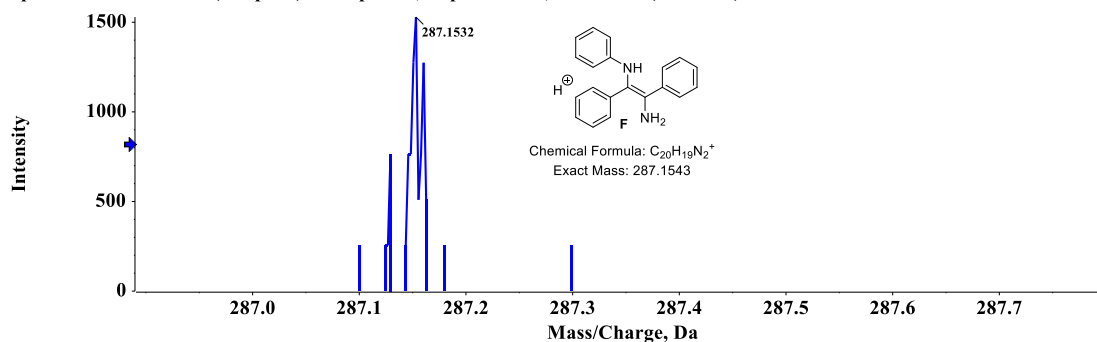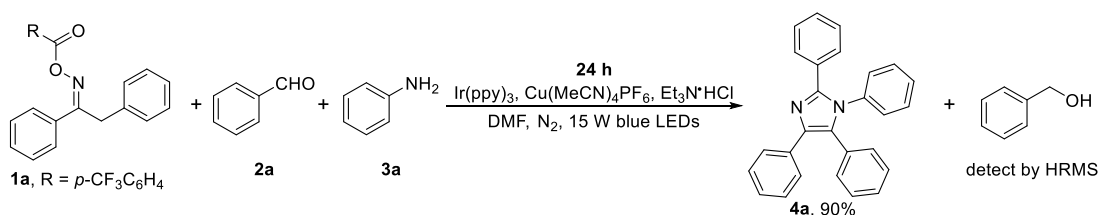

To a reaction tube equipped with a magnetic stir bar were added oxime ester **1a** (76.6 mg, 0.20 mmol), aldehyde **2a** (42.4 mg, 0.40 mmol), amine **3a** (37.3 mg, 0.40 mmol), Ir(ppy)<sub>3</sub> (1.3 mg, 0.0020 mmol), Cu(MeCN)<sub>4</sub>PF<sub>6</sub> (7.5 mg, 0.020 mmol), Et<sub>3</sub>N HCl (55.2 mg, 0.40 mmol), and DMF (2.0 mL). The reaction mixture was irradiated with a 15 W blue LED lamp and stirred at 25 °C under nitrogen atmosphere for 24 h. After that, a trace amount of the crude reaction mixture was subjected to the HRMS analysis, which indicated that benzyl alcohol could be formed. Afterwards, the



mixture was diluted with water (15 mL) and extracted with EtOAc (15 mL×3). The combined organic layers were washed with brine, dried over Na<sub>2</sub>SO<sub>4</sub>, filtered, and concentrated under reduced pressure. The residue was purified by column chromatography on silica gel (eluent: petroleum ether/ethyl acetate = 20:1) to give product **4a** (67.1 mg, 90%).

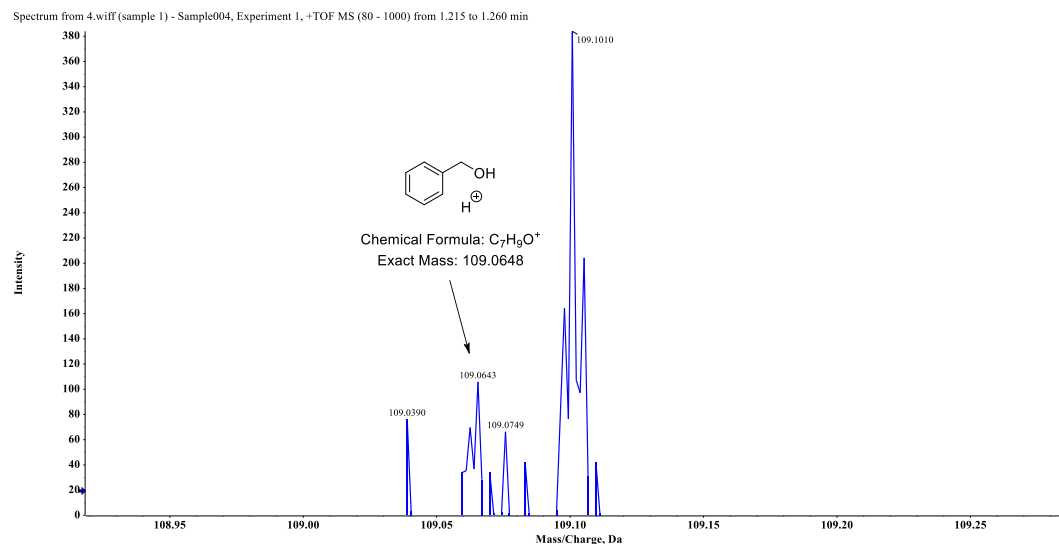

#### 4.6 Fluorescence quenching experiments

The luminescence quenching experiment was taken using a FluoroMax-4 Spectrophotometer. The experiments were carried out with the  $3 \times 10^{-5}$  mol/L of Ir(ppy)<sub>3</sub> in DMF at 25 °C under nitrogen atmosphere. The concentrations of quencher (**1a**, **2a**, **3a**, Et<sub>3</sub>N HCl) in DMF were 1 mmol/L, 2 mmol/L, 3 mmol/L, 4 mmol/L. The excitation wavelength was 384 nm and the emission intensity was collected at 523 nm. The ratio of I<sub>0</sub>/I was plotted as a function of the quencher concentration (I<sub>0</sub> = emission intensity of the photocatalyst in isolation at the specified wavelength; I = observed emission intensity of the photocatalyst with added quencher).

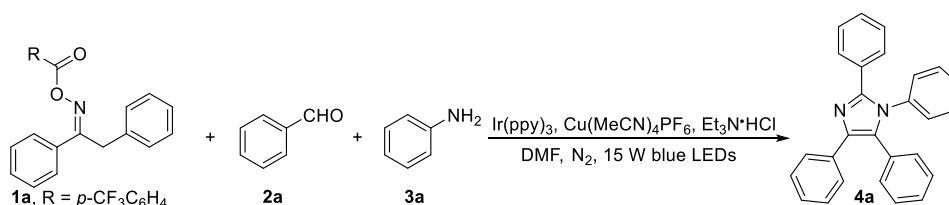

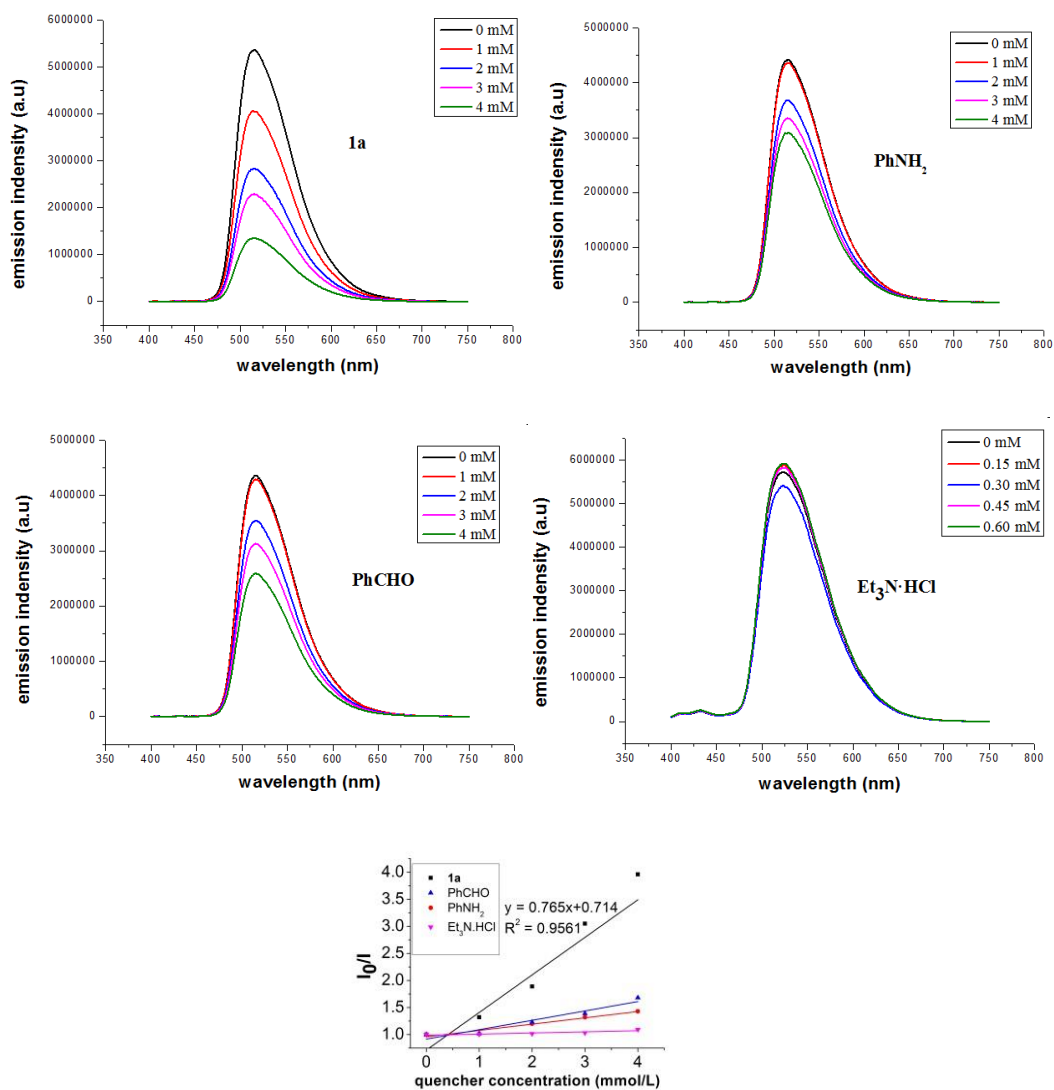

**Figure S3.** Emission quenching experiments with oxime ester **1a**, PhCHO **2a**, PhNH<sub>2</sub> **3a**, or Et<sub>3</sub>N HCl as quenchers.

#### 4.7 Light on/off experiments

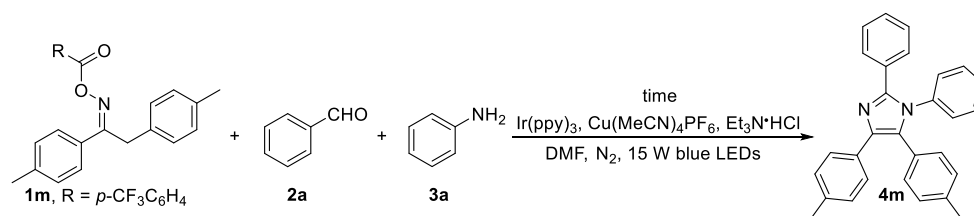

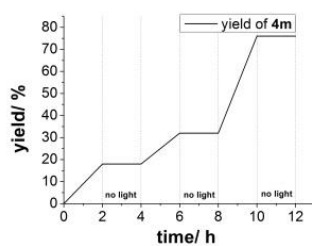

**Figure S4** Light on-off experiments

The yield of **4m** was determined by  $^1\text{H}$  NMR using 1,2-dibromoethane as an internal standard. The results revealed that a radical chain process was not the major reaction pathway.

#### 4.8 Reductive potential of substrate

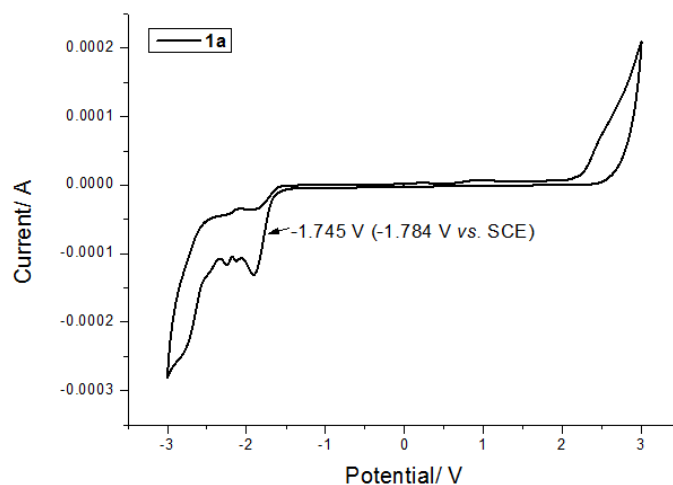

**Figure S3.** Cyclic voltammogram of **1a**

$$E_{1/2}^{\text{Red}}(\mathbf{1a}) = -1.78 \text{ V vs. SCE}$$

## 5.Characterization data

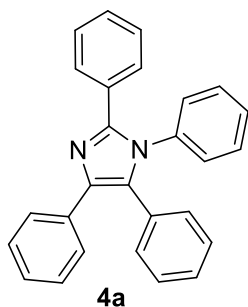

White solid (0.20 mmol scale, 67.1 mg, 90%; 3.0 mmol scale, 0.98 g, 88%); mp 178-179 °C;  $^1\text{H}$  NMR (400 MHz,  $\text{CDCl}_3$ )  $\delta$  7.60 (d,  $J = 7.6$  Hz, 2H), 7.45 – 7.39 (m, 2H), 7.30 – 7.16 (m, 12H), 7.12 (d,  $J = 6.1$  Hz, 2H), 7.03 (d,  $J = 7.0$  Hz, 2H).  $^{13}\text{C}$  NMR (100 MHz,  $\text{CDCl}_3$ )  $\delta$  146.9, 138.2, 137.0, 134.4, 131.1, 130.8, 130.6, 130.4, 129.0, 128.9, 128.4, 128.3, 128.2, 128.12, 128.05, 127.9, 127.6, 127.4, 126.6; HRMS (ESI-TOF)  $m/z$ :  $[\text{M}+\text{H}]^+$  calcd for  $\text{C}_{27}\text{H}_{21}\text{N}_2$  373.1699, found 373.1676.

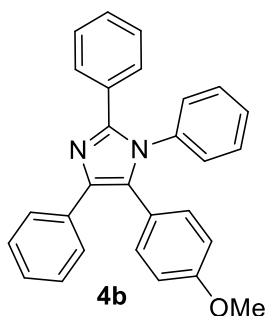

White solid (44.3 mg, 55%); mp 179-180 °C;  $^1\text{H}$  NMR (400 MHz,  $\text{CDCl}_3$ )  $\delta$  7.64 – 7.60 (m, 2H), 7.45 – 7.39 (m, 2H), 7.29 – 7.17 (m, 9H), 7.07 – 7.00 (m, 4H), 6.78 – 6.72 (m, 2H), 3.77 (s, 3H).  $^{13}\text{C}$  NMR (100 MHz,  $\text{CDCl}_3$ )  $\delta$  159.2, 146.7, 138.0, 137.1, 134.5, 132.3, 130.7, 130.5, 129.0, 128.9, 128.4, 128.2, 128.14, 128.11, 128.0, 127.3, 126.4, 122.7, 113.8, 55.1; HRMS (ESI-TOF)  $m/z$ :  $[\text{M}+\text{H}]^+$  calcd for  $\text{C}_{28}\text{H}_{23}\text{N}_2\text{O}$  403.1805, found 403.1823.

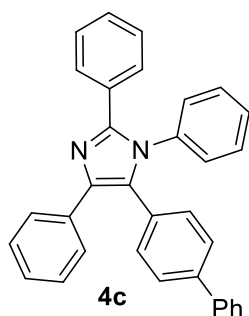

White solid (65.5 mg, 73%); mp 177-178 °C;  $^1\text{H}$  NMR (500 MHz,  $\text{CDCl}_3$ )  $\delta$  7.70 – 7.63 (m, 2H), 7.59 – 7.53 (m, 2H), 7.52 – 7.42 (m, 4H), 7.41 – 7.36 (m, 2H), 7.32 – 7.29 (m, 1H), 7.27 – 7.18 (m, 9H), 7.18 – 7.15 (m, 2H), 7.08 – 7.01 (m, 2H).  $^{13}\text{C}$  NMR (126 MHz,  $\text{CDCl}_3$ )  $\delta$  147.0, 140.2, 140.1, 138.5, 137.0, 134.4, 131.3, 131.1, 130.43, 130.40, 129.1, 128.9, 128.7, 128.4, 128.3, 128.23, 128.21, 128.15, 128.0, 127.5, 126.81, 126.78, 126.6; HRMS (ESI-TOF)  $m/z$ :  $[\text{M}+\text{H}]^+$  calcd for  $\text{C}_{33}\text{H}_{25}\text{N}_2$  449.2012, found 449.2009.

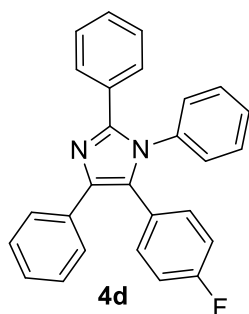

White solid (51.5 mg, 66%); mp 165-166 °C;  $^1\text{H}$  NMR (500 MHz,  $\text{CDCl}_3$ )  $\delta$  7.61 – 7.55 (m, 2H), 7.44 – 7.40 (m, 2H), 7.30 – 7.19 (m, 9H), 7.11 – 7.07 (m, 2H), 7.04 – 7.00 (m, 2H), 6.94 – 6.89 (m, 2H).  $^{13}\text{C}$  NMR (126 MHz,  $\text{CDCl}_3$ )  $\delta$  162.4 (d,  $J = 248.4$  Hz), 147.0, 138.4, 136.9, 134.2, 132.9 (d,  $J = 8.1$  Hz), 130.3, 129.7, 129.2, 129.0, 128.9, 128.4, 128.3, 128.2, 128.1, 127.4, 126.7, 126.6 (d,  $J = 3.6$  Hz), 115.5 (d,  $J = 21.6$  Hz); HRMS (ESI-TOF)  $m/z$ :  $[\text{M}+\text{H}]^+$  calcd for  $\text{C}_{27}\text{H}_{20}\text{FN}_2$  391.1605, found 391.1614.

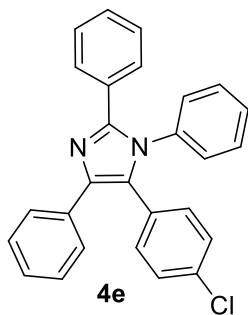

White solid (66.7 mg, 82%); mp 170-171 °C;  $^1\text{H}$  NMR (500 MHz,  $\text{CDCl}_3$ )  $\delta$  7.59 – 7.56 (m, 2H), 7.43 – 7.39 (m, 2H), 7.32 – 7.22 (m, 9H), 7.20 – 7.18 (m, 2H), 7.06 – 7.01 (m, 4H).  $^{13}\text{C}$  NMR (126 MHz,  $\text{CDCl}_3$ )  $\delta$  147.3, 138.7, 136.8, 134.0, 132.3, 129.9, 129.4, 129.3, 129.0, 128.7, 128.6, 128.5, 128.40, 128.36, 128.3, 128.1, 127.5, 126.9, 126.4; HRMS (ESI-TOF)  $m/z$ :  $[\text{M}+\text{H}]^+$  calcd for  $\text{C}_{27}\text{H}_{20}\text{ClN}_2$  407.1310, found 407.1323.

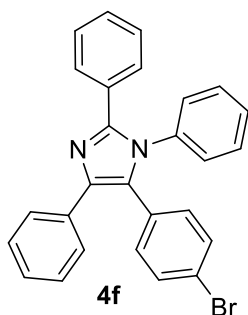

White solid (70.4 mg, 78%); mp 174-175 °C;  $^1\text{H}$  NMR (500 MHz,  $\text{CDCl}_3$ )  $\delta$  7.59 – 7.55 (m, 2H), 7.43 – 7.38 (m, 2H), 7.35 – 7.32 (m, 2H), 7.31 – 7.19 (m, 9H), 7.04 – 7.01 (m, 2H), 6.99 – 6.95 (m, 2H).  $^{13}\text{C}$  NMR (126 MHz,  $\text{CDCl}_3$ )  $\delta$  147.3, 138.7, 136.8, 134.1, 132.5, 131.6, 130.2, 129.5, 129.4, 129.3, 128.9, 128.5, 128.4, 128.34, 128.25, 128.1, 127.5, 126.9, 122.2; HRMS (ESI-TOF)  $m/z$ :  $[\text{M}+\text{H}]^+$  calcd for  $\text{C}_{27}\text{H}_{20}\text{BrN}_2$  451.0804, found 451.0832.

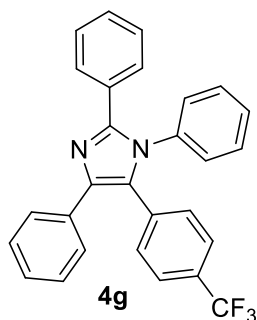

White solid (60.8 mg, 69%); mp 163-164 °C;  $^1\text{H}$  NMR (400 MHz,  $\text{CDCl}_3$ )  $\delta$  7.71 (d,  $J = 8.1$  Hz, 2H), 7.49 (d,  $J = 8.3$  Hz, 2H), 7.46 – 7.39 (m, 2H), 7.29 – 7.22 (m, 9H), 7.18 – 7.10 (m, 2H), 7.08 – 7.00 (m, 2H).  $^{13}\text{C}$  NMR (100 MHz,  $\text{CDCl}_3$ )  $\delta$  147.3, 138.0 (q,  $J = 1.4$  Hz), 136.78, 136.75, 132.0, 131.0, 130.2, 130.1, 129.1, 128.9, 128.55, 128.55 (q,  $J = 33.9$  Hz), 128.5, 128.42, 128.38, 128.3, 128.2, 127.2, 125.1 (q,  $J = 3.8$  Hz), 124.4 (q,  $J = 270.1$  Hz); HRMS (ESI-TOF)  $m/z$ :  $[\text{M}+\text{H}]^+$  calcd for  $\text{C}_{28}\text{H}_{20}\text{F}_3\text{N}_2$  441.1573, found 441.1578.

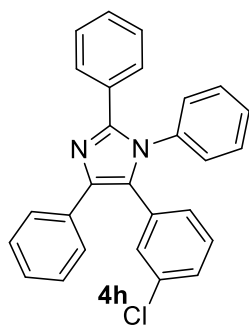

White solid (51.3 mg, 63%); mp 169-170 °C;  $^1\text{H}$  NMR (500 MHz,  $\text{CDCl}_3$ )  $\delta$  7.72 – 7.70 (m, 1H), 7.44 – 7.41 (m, 2H), 7.37 (dt,  $J = 7.2, 1.6$  Hz, 1H), 7.28 – 7.22 (m, 9H), 7.16 – 7.10 (m, 4H), 7.05 – 7.01 (m, 2H).  $^{13}\text{C}$  NMR (100 MHz,  $\text{CDCl}_3$ )  $\delta$  147.0, 136.8, 136.3, 134.1, 131.4, 131.0, 130.2, 130.1, 129.3, 129.1, 128.9, 128.44, 128.38, 128.34, 128.32, 128.2, 128.1, 127.3, 126.5, 125.2; HRMS (ESI-TOF)  $m/z$ :  $[\text{M}+\text{H}]^+$  calcd for  $\text{C}_{27}\text{H}_{20}\text{ClN}_2$  407.1310, found 407.1322.

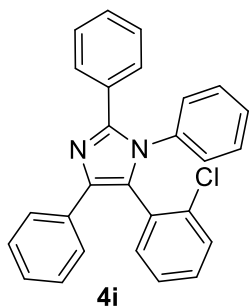

White solid (55.3 mg, 68%); mp 166-167 °C;  $^1\text{H}$  NMR (400 MHz,  $\text{CDCl}_3$ )  $\delta$  7.58 – 7.51 (m, 1H), 7.44 – 7.37 (m, 2H), 7.37 – 7.26 (m, 4H), 7.27 – 7.17 (m, 5H), 7.13 – 7.05 (m, 5H), 6.92 – 6.87 (m, 2H).  $^{13}\text{C}$  NMR (100 MHz,  $\text{CDCl}_3$ )  $\delta$  146.7, 137.0, 136.9, 133.9, 133.7, 132.8, 132.1, 130.1, 129.9, 129.8, 129.6, 129.2, 129.1, 128.9, 128.4, 128.3, 128.02, 127.98, 127.9, 127.3, 126.5; HRMS (ESI-TOF)  $m/z$ :  $[\text{M}+\text{H}]^+$  calcd for  $\text{C}_{27}\text{H}_{20}\text{ClN}_2$  407.1310, found 407.1315.

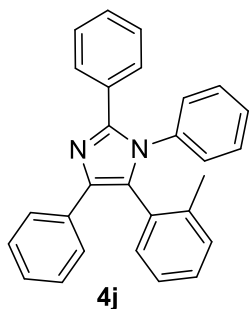

White solid (49.5 mg, 64%); mp 164-165 °C;  $^1\text{H}$  NMR (400 MHz,  $\text{CDCl}_3$ )  $\delta$  7.41 – 7.35 (m, 3H), 7.33 – 7.28 (m, 3H), 7.26 – 7.17 (m, 4H), 7.17 – 7.13 (m, 2H), 7.12 – 7.03 (m, 5H), 6.90 – 6.83 (m, 2H), 2.12 (s, 3H).  $^{13}\text{C}$  NMR (100 MHz,  $\text{CDCl}_3$ )  $\delta$  146.4, 139.5, 137.3, 137.1, 134.2, 131.3, 131.1, 130.5, 130.2, 130.1, 129.9, 129.1, 129.0, 128.4, 128.2, 128.1, 128.0, 127.9, 127.4, 127.0, 125.4, 20.3; HRMS (ESI-TOF)  $m/z$ :  $[\text{M}+\text{H}]^+$  calcd for  $\text{C}_{28}\text{H}_{23}\text{N}_2$  387.1856, found 387.1863.



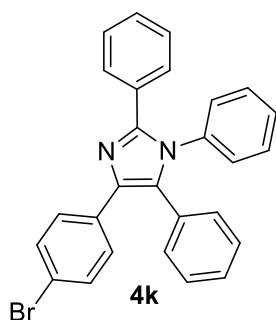

White solid (69.1 mg, 77%); mp 167-168 °C;  $^1\text{H}$  NMR (400 MHz,  $\text{CDCl}_3$ )  $\delta$  7.50 – 7.43 (m, 2H), 7.41 (dd,  $J = 7.8, 1.9$  Hz, 2H), 7.39 – 7.32 (m, 2H), 7.30 – 7.20 (m, 9H), 7.15 – 7.08 (m, 2H), 7.07 – 6.99 (m, 2H).  $^{13}\text{C}$  NMR (100 MHz,  $\text{CDCl}_3$ )  $\delta$  147.1, 137.2, 136.9, 133.4, 131.2, 131.1, 131.0, 130.33, 130.30, 129.1, 128.87, 128.86, 128.5, 128.4, 128.3, 128.2, 128.1, 120.5; HRMS (ESI-TOF)  $m/z$ :  $[\text{M}+\text{H}]^+$  calcd for  $\text{C}_{27}\text{H}_{20}\text{BrN}_2$  451.0804, found 451.0823.

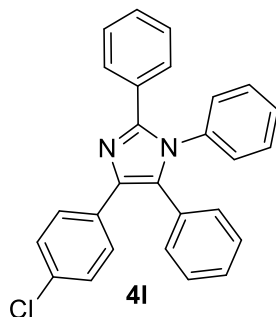

White solid (65.9 mg, 81%); mp 170-171 °C;  $^1\text{H}$  NMR (500 MHz,  $\text{CDCl}_3$ )  $\delta$  7.59 – 7.56 (m, 2H), 7.43 – 7.40 (m, 2H), 7.31 – 7.21 (m, 9H), 7.21 – 7.18 (m, 2H), 7.06 – 7.01 (m, 4H).  $^{13}\text{C}$  NMR (126 MHz,  $\text{CDCl}_3$ )  $\delta$  147.2, 138.7, 136.8, 134.0, 132.3, 129.4, 129.3, 129.1, 129.04, 128.95, 128.7, 128.5, 128.41, 128.35, 128.3, 128.1, 127.6, 127.5, 126.9; HRMS (ESI-TOF)  $m/z$ :  $[\text{M}+\text{H}]^+$  calcd for  $\text{C}_{27}\text{H}_{20}\text{ClN}_2$  407.1310, found 407.1316.

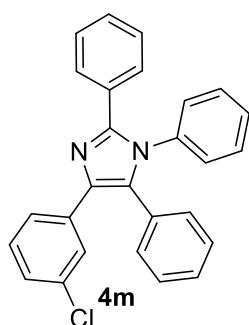

White solid (53.7 mg, 66%); mp 166-167 °C;  $^1\text{H}$  NMR (400 MHz,  $\text{CDCl}_3$ )  $\delta$  7.60 – 7.55 (m, 2H), 7.42 (dd,  $J = 7.8, 1.9$  Hz, 2H), 7.33 – 7.18 (m, 10H), 7.17 – 7.09 (m, 2H), 7.07 – 6.97 (m, 3H).  $^{13}\text{C}$  NMR (100 MHz,  $\text{CDCl}_3$ )  $\delta$  147.3, 138.8, 136.7, 134.1, 133.9, 132.4, 130.9, 130.2, 129.6, 129.3, 129.21, 129.18, 128.9, 128.5, 128.4, 128.3, 128.2, 128.11, 128.09, 127.5, 126.9; HRMS (ESI-TOF)  $m/z$ :  $[\text{M}+\text{H}]^+$  calcd for  $\text{C}_{27}\text{H}_{20}\text{ClN}_2$  407.1310, found 407.1326.

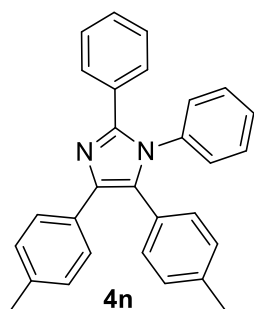

White solid (65.7 mg, 82%); mp 168-169 °C;  $^1\text{H}$  NMR (400 MHz,  $\text{CDCl}_3$ )  $\delta$  7.50 (d,  $J = 7.4$  Hz, 2H), 7.43 – 7.37 (m, 2H), 7.26 – 7.17 (m, 6H), 7.07 – 6.95 (m, 8H), 2.29 (s, 3H), 2.27 (s, 3H).  $^{13}\text{C}$  NMR (100 MHz,  $\text{CDCl}_3$ )  $\delta$  146.6, 138.1, 137.5, 137.1, 136.0, 131.6, 130.8, 130.5, 130.4, 129.0, 128.91, 128.85, 128.8, 128.4, 128.03, 127.95, 127.6, 127.2, 21.2, 21.1; HRMS (ESI-TOF)  $m/z$ :  $[\text{M}+\text{H}]^+$  calcd for  $\text{C}_{29}\text{H}_{25}\text{N}_2$  401.2012, found 401.2008.

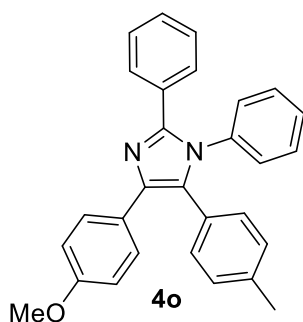

White solid (54.1 mg, 65%); mp 177-178 °C;  $^1\text{H}$  NMR (500 MHz,  $\text{CDCl}_3$ )  $\delta$  7.55 – 7.51 (m, 2H), 7.41 (dd,  $J = 7.6, 2.0$  Hz, 2H), 7.29 – 7.19 (m, 6H), 7.05 – 6.97 (m, 6H), 6.83 – 6.78 (m, 2H), 3.78 (s, 3H), 2.29 (s, 3H).  $^{13}\text{C}$  NMR (126 MHz,  $\text{CDCl}_3$ )  $\delta$  158.4, 146.6, 137.9, 137.6, 137.2, 130.9, 130.6, 130.0, 129.03, 128.97, 128.9, 128.5, 128.4,

128.1, 128.0, 127.6, 127.2, 113.5, 55.1, 21.3; HRMS (ESI-TOF)  $m/z$ :  $[M+H]^+$  calcd for  $C_{29}H_{25}N_2O$  417.1961, found 417.1969.

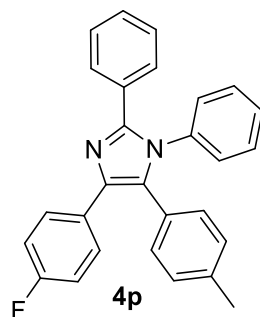

White solid (51.0 mg, 63%); mp 166-167 °C;  $^1H$  NMR (500 MHz,  $CDCl_3$ )  $\delta$  7.59 – 7.53 (m, 2H), 7.43 – 7.38 (m, 2H), 7.29 – 7.21 (m, 6H), 7.05 – 7.01 (m, 4H), 7.00 – 6.97 (m, 2H), 6.96 – 6.91 (m, 2H), 2.30 (s, 3H).  $^{13}C$  NMR (126 MHz,  $CDCl_3$ )  $\delta$  161.8 (d,  $J = 245.7$  Hz), 146.8, 137.9, 137.2, 137.1, 130.8, 130.7, 130.6, 130.4, 129.2, 129.0, 128.94 (d,  $J = 7.7$  Hz), 128.88, 128.4, 128.2 (d,  $J = 3.7$  Hz), 128.1, 127.3, 116.0 (d,  $J = 21.4$  Hz), 21.3; HRMS (ESI-TOF)  $m/z$ :  $[M+H]^+$  calcd for  $C_{28}H_{22}FN_2$  405.1762, found 405.1777.

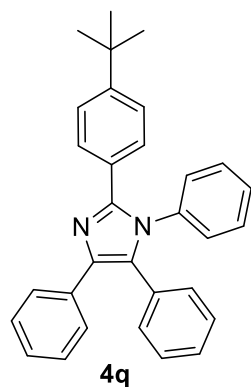

White solid (60.9 mg, 71%); mp 171-172 °C;  $^1H$  NMR (500 MHz,  $CDCl_3$ )  $\delta$  7.62 – 7.58 (m, 2H), 7.35 (d,  $J = 8.5$  Hz, 2H), 7.29 – 7.17 (m, 11H), 7.13 – 7.10 (m, 2H), 7.07 – 7.03 (m, 2H), 1.27 (s, 9H).  $^{13}C$  NMR (126 MHz,  $CHLOROFORM-D$ )  $\delta$  151.2, 146.9, 138.0, 137.1, 134.4, 131.0, 130.6, 130.6, 129.0, 128.4, 128.24, 128.15, 128.1, 127.8, 127.5, 127.3, 126.5, 125.0, 34.5, 31.1. HRMS (ESI-TOF)  $m/z$ :  $[M+H]^+$  calcd for  $C_{31}H_{29}N_2$  429.2325, found 429.2332.

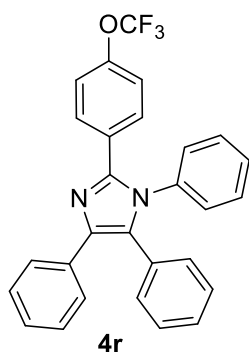

White solid (58.4 mg, 64%); mp 162-163 °C;  $^1\text{H}$  NMR (400 MHz,  $\text{CDCl}_3$ )  $\delta$  7.59 (d,  $J = 7.1$  Hz, 2H), 7.46 (d,  $J = 8.8$  Hz, 2H), 7.35 – 7.15 (m, 9H), 7.14 – 7.10 (m, 2H), 7.08 (d,  $J = 8.5$  Hz, 2H), 7.04 (dd,  $J = 7.7, 1.7$  Hz, 2H).  $^{13}\text{C}$  NMR (100 MHz,  $\text{CDCl}_3$ )  $\delta$  149.0 (q,  $J = 2.0$  Hz), 145.5, 138.4, 136.8, 134.2, 131.2, 131.0, 130.3, 130.2, 129.24, 129.15, 128.5, 128.4, 128.3, 128.2, 128.1, 127.3, 126.7, 120.4, 120.3 (q,  $J = 256.0$  Hz); HRMS (ESI-TOF)  $m/z$ :  $[\text{M}+\text{H}]^+$  calcd for  $\text{C}_{28}\text{H}_{20}\text{F}_3\text{N}_2\text{O}$  457.1522, found 457.1534.

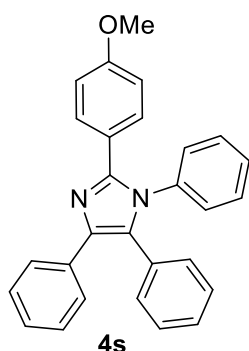

White solid (63.6 mg, 79%); mp 176-177 °C;  $^1\text{H}$  NMR (500 MHz,  $\text{CDCl}_3$ )  $\delta$  7.62 – 7.58 (m, 2H), 7.37 – 7.33 (m, 2H), 7.26 – 7.14 (m, 9H), 7.13 – 7.09 (m, 2H), 7.04 – 7.00 (m, 2H), 6.77 – 6.73 (m, 2H), 3.74 (s, 3H).  $^{13}\text{C}$  NMR (100 MHz,  $\text{CDCl}_3$ )  $\delta$  159.5, 146.8, 137.9, 137.1, 134.4, 131.0, 130.6, 130.4, 130.2, 129.0, 128.4, 128.2, 128.1, 128.0, 127.8, 127.3, 126.4, 123.0, 113.4, 55.1; HRMS (ESI-TOF)  $m/z$ :  $[\text{M}+\text{H}]^+$  calcd for  $\text{C}_{28}\text{H}_{23}\text{N}_2\text{O}$  403.1805, found 403.1821.

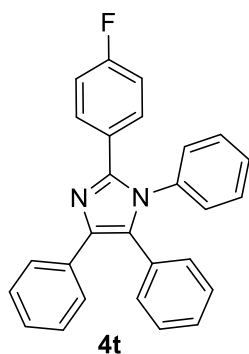

White solid (52.3 mg, 67%); mp 164-165 °C;  $^1\text{H}$  NMR (400 MHz,  $\text{CDCl}_3$ )  $\delta$  7.62 – 7.55 (m, 2H), 7.44 – 7.36 (m, 2H), 7.30 – 7.16 (m, 9H), 7.14 – 7.10 (m, 2H), 7.06 – 6.99 (m, 2H), 6.96 – 6.89 (m, 2H).  $^{13}\text{C}$  NMR (100 MHz,  $\text{CDCl}_3$ )  $\delta$  162.6 (d,  $J = 248.7$  Hz), 146.0, 138.2, 136.9, 134.2, 131.1, 130.83, 130.79 (d,  $J = 8.2$  Hz), 130.5, 129.1, 128.37, 128.36, 128.35 (d,  $J = 3.4$  Hz), 128.3, 128.2, 128.0, 127.3, 126.7, 115.2 (d,  $J = 21.7$  Hz); HRMS (ESI-TOF)  $m/z$ :  $[\text{M}+\text{H}]^+$  calcd for  $\text{C}_{27}\text{H}_{20}\text{FN}_2$  391.1605, found 391.1611.

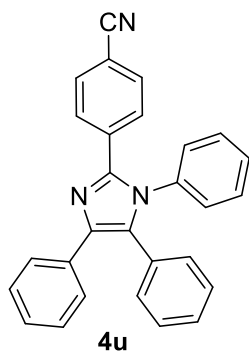

White solid (50.0 mg, 63%); mp 167-168 °C;  $^1\text{H}$  NMR (500 MHz,  $\text{CDCl}_3$ )  $\delta$  7.60 – 7.56 (m, 2H), 7.54 (d,  $J = 8.2$  Hz, 2H), 7.51 (d,  $J = 7.8$  Hz, 2H), 7.35 – 7.19 (m, 9H), 7.15 – 7.10 (m, 2H), 7.06 (d,  $J = 7.5$  Hz, 2H).  $^{13}\text{C}$  NMR (126 MHz,  $\text{CDCl}_3$ )  $\delta$  144.6, 139.1, 136.6, 134.6, 133.9, 132.1, 131.8, 131.0, 129.9, 129.4, 128.9, 128.4, 128.3, 128.2, 127.3, 126.9, 118.6, 111.4; HRMS (ESI-TOF)  $m/z$ :  $[\text{M}+\text{H}]^+$  calcd for  $\text{C}_{28}\text{H}_{20}\text{N}_3$  398.1652, found 398.1653.

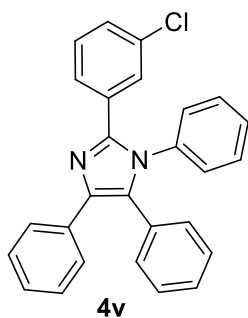

White solid (49.6 mg, 61%); mp 173-174 °C;  $^1\text{H}$  NMR (400 MHz,  $\text{CDCl}_3$ )  $\delta$  7.59 (d,  $J = 7.5$  Hz, 2H), 7.55 (s, 1H), 7.31 – 7.16 (m, 11H), 7.15 – 7.09 (m, 3H), 7.07 – 7.01 (m, 2H).  $^{13}\text{C}$  NMR (100 MHz,  $\text{CDCl}_3$ )  $\delta$  145.4, 138.5, 136.7, 134.2, 134.1, 132.2, 131.3, 131.0, 130.3, 129.2, 129.0, 128.5, 128.43, 128.35, 128.30, 128.27, 128.2, 128.1, 127.3, 126.7; HRMS (ESI-TOF)  $m/z$ :  $[\text{M}+\text{H}]^+$  calcd for  $\text{C}_{27}\text{H}_{20}\text{ClN}_2$  407.1310, found 407.1318.

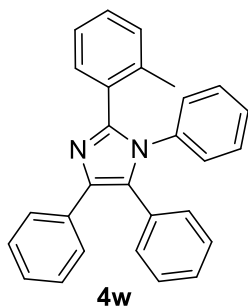

White solid (45.6 mg, 59%); mp 175-176 °C;  $^1\text{H}$  NMR (400 MHz,  $\text{CDCl}_3$ )  $\delta$  7.63 – 7.58 (m, 2H), 7.26 – 7.21 (m, 6H), 7.19 – 7.14 (m, 4H), 7.16 – 7.07 (m, 4H), 7.08 – 7.03 (m, 1H), 6.91 – 6.84 (m, 2H), 2.22 (s, 3H).  $^{13}\text{C}$  NMR (100 MHz,  $\text{CDCl}_3$ )  $\delta$  147.3, 138.1, 137.6, 136.4, 134.5, 131.1, 130.9, 130.7, 130.5, 130.0, 129.2, 128.9, 128.5, 128.4, 128.1, 127.8, 127.7, 127.6, 127.4, 126.5, 125.2, 20.2; HRMS (ESI-TOF)  $m/z$ :  $[\text{M}+\text{H}]^+$  calcd for  $\text{C}_{28}\text{H}_{23}\text{N}_2$  387.1856, found 387.1863.

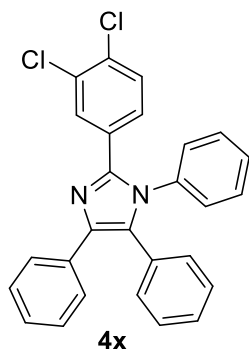

White solid (44.1 mg, 50%); mp 176-177 °C;  $^1\text{H}$  NMR (500 MHz,  $\text{CDCl}_3$ )  $\delta$  7.66 (d,  $J = 2.1$  Hz, 1H), 7.61 – 7.56 (m, 2H), 7.32 – 7.18 (m, 10H), 7.13 – 7.09 (m, 3H), 7.06 – 7.02 (m, 2H).  $^{13}\text{C}$  NMR (126 MHz,  $\text{CDCl}_3$ )  $\delta$  144.3, 138.6, 136.5, 134.0, 132.4, 132.3, 131.5, 131.0, 130.5, 130.4, 130.1, 129.9, 129.3, 128.7, 128.4, 128.22, 128.17, 128.1, 127.5, 127.3, 126.8; HRMS (ESI-TOF)  $m/z$ :  $[\text{M}+\text{H}]^+$  calcd for  $\text{C}_{27}\text{H}_{19}\text{Cl}_2\text{N}_2$  441.0920, found 441.0936.

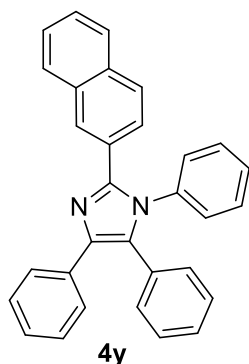

White solid (52.4 mg, 62%); mp 180-181 °C;  $^1\text{H}$  NMR (400 MHz,  $\text{CDCl}_3$ )  $\delta$  7.92 (s, 1H), 7.79 – 7.72 (m, 1H), 7.71 – 7.60 (m, 4H), 7.53 (dd,  $J = 8.6, 1.7$  Hz, 1H), 7.47 – 7.38 (m, 2H), 7.32 – 7.18 (m, 9H), 7.19 – 7.12 (m, 2H), 7.08 (d,  $J = 7.1$  Hz, 2H).  $^{13}\text{C}$  NMR (100 MHz,  $\text{CDCl}_3$ )  $\delta$  146.8, 138.5, 137.1, 134.4, 132.9, 132.8, 131.1, 131.0, 130.5, 129.1, 128.49, 128.46, 128.4, 128.33, 128.30, 128.2, 128.0, 127.8, 127.6, 127.51, 127.45, 126.6, 126.5, 126.2, 126.1; HRMS (ESI-TOF)  $m/z$ :  $[\text{M}+\text{H}]^+$  calcd for  $\text{C}_{31}\text{H}_{23}\text{N}_2$  423.1856, found 423.1865.

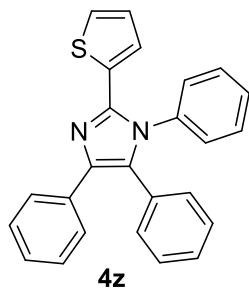

White solid (55.3 mg, 73%); mp 167-168 °C; <sup>1</sup>H NMR (500 MHz, CDCl<sub>3</sub>) δ 7.61 – 7.58 (dd, *J* = 7.2, 1.6 Hz, 2H), 7.38 – 7.33 (m, 3H), 7.26 – 7.21 (m, 3H), 7.21 – 7.17 (m, 6H), 7.15 – 7.12 (m, 2H), 6.83 (dd, *J* = 5.1, 3.7 Hz, 1H), 6.67 (dd, *J* = 3.7, 1.1 Hz, 1H). <sup>13</sup>C NMR (126 MHz, CDCl<sub>3</sub>) δ 142.1, 138.2, 136.6, 134.1, 133.1, 131.0, 130.2, 129.3, 129.1, 128.9, 128.3, 128.1, 128.0, 127.3, 127.1, 126.6, 126.3, 126.1; HRMS (ESI-TOF) *m/z*: [M+H]<sup>+</sup> calcd for C<sub>25</sub>H<sub>19</sub>N<sub>2</sub>S 379.1263, found 379.1271.

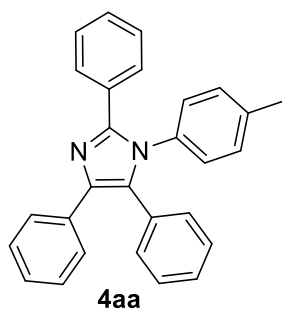

White solid (68.0 mg, 88%); mp 160-161 °C; <sup>1</sup>H NMR (500 MHz, CDCl<sub>3</sub>) δ 7.61 – 7.57 (m, 2H), 7.47 – 7.42 (m, 2H), 7.27 – 7.20 (m, 8H), 7.20 – 7.16 (m, 1H), 7.15 – 7.11 (m, 2H), 7.03 (d, *J* = 8.2 Hz, 2H), 6.93 – 6.89 (m, 2H), 2.30 (s, 3H). <sup>13</sup>C NMR (126 MHz, CDCl<sub>3</sub>) δ 146.9, 138.13, 138.09, 134.5, 134.4, 131.1, 130.9, 130.7, 130.6, 129.6, 128.9, 128.3, 128.12, 128.08, 128.06, 128.0, 127.8, 127.4, 126.5, 21.1; HRMS (ESI-TOF) *m/z*: [M+H]<sup>+</sup> calcd for C<sub>28</sub>H<sub>23</sub>N<sub>2</sub> 387.1856, found 387.1868.



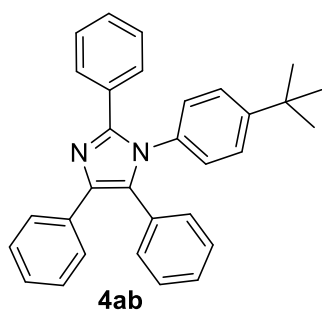

White solid (73.7 mg, 86%); mp 161-162 °C;  $^1\text{H}$  NMR (500 MHz,  $\text{CDCl}_3$ )  $\delta$  7.61 – 7.57 (m, 2H), 7.45 – 7.40 (m, 2H), 7.27 – 7.17 (m, 11H), 7.27 – 7.16 (m, 2H), 6.97 – 6.92 (m, 2H), 1.27 (s, 9H).  $^{13}\text{C}$  NMR (126 MHz,  $\text{CDCl}_3$ )  $\delta$  151.4, 147.0, 138.2, 134.5, 134.3, 131.1, 130.9, 130.7, 130.6, 128.9, 128.2, 128.1, 128.0, 127.82, 127.79, 127.4, 126.5, 125.9, 34.6, 31.2; HRMS (ESI-TOF)  $m/z$ :  $[\text{M}+\text{H}]^+$  calcd for  $\text{C}_{31}\text{H}_{29}\text{N}_2$  429.2325, found 429.2334.

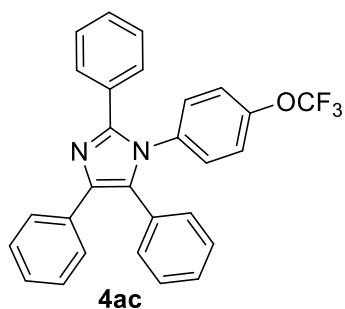

White solid (56.6 mg, 62%); mp 162-163 °C;  $^1\text{H}$  NMR (400 MHz,  $\text{CDCl}_3$ )  $\delta$  7.62 – 7.54 (m, 2H), 7.40 (dd,  $J = 7.7, 2.0$  Hz, 2H), 7.31 – 7.16 (m, 9H), 7.15 – 7.06 (m, 4H), 7.06 – 7.02 (m, 2H).  $^{13}\text{C}$  NMR (100 MHz,  $\text{CDCl}_3$ )  $\delta$  148.6 (q,  $J = 2.0$  Hz), 147.0, 138.5, 135.5, 134.1, 131.0, 130.6, 130.2, 130.1, 129.8, 129.0, 128.52, 128.50, 128.22, 128.17, 127.4, 126.8, 121.2, 120.2 (q,  $J = 256.9$  Hz); HRMS (ESI-TOF)  $m/z$ :  $[\text{M}+\text{H}]^+$  calcd for  $\text{C}_{28}\text{H}_{20}\text{F}_3\text{N}_2\text{O}$  457.1522, found 457.1555.

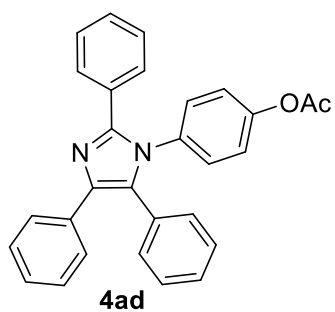

White solid (57.7 mg, 67%); mp 179-180 °C;  $^1\text{H}$  NMR (500 MHz,  $\text{CDCl}_3$ )  $\delta$  7.61 – 7.57 (m, 2H), 7.44 – 7.41 (m, 2H), 7.27 – 7.21 (m, 8H), 7.20 – 7.16 (m, 1H), 7.14 – 7.11 (m, 2H), 7.04 – 6.98 (m, 4H), 2.25 (s, 3H).  $^{13}\text{C}$  NMR (100 MHz,  $\text{CDCl}_3$ )  $\delta$  168.7, 150.1, 147.0, 138.3, 134.3, 134.2, 131.0, 130.7, 130.3, 130.2, 129.2, 128.9, 128.4, 128.3, 128.14, 128.11, 128.0, 127.4, 126.6, 122.1, 21.1; HRMS (ESI-TOF)  $m/z$ :  $[\text{M}+\text{H}]^+$  calcd for  $\text{C}_{29}\text{H}_{23}\text{N}_2\text{O}_2$  431.1754, found 431.1756.

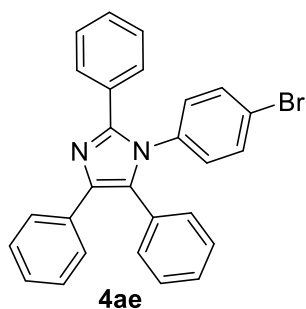

White solid (72.1 mg, 80%); mp 177-178 °C;  $^1\text{H}$  NMR (500 MHz,  $\text{CDCl}_3$ )  $\delta$  7.60 – 7.55 (m, 2H), 7.43 – 7.39 (m, 2H), 7.38 – 7.34 (m, 2H), 7.30 – 7.21 (m, 8H), 7.21 – 7.16 (m, 1H), 7.14 – 7.09 (m, 2H), 6.91 – 6.86 (m, 2H).  $^{13}\text{C}$  NMR (126 MHz,  $\text{CDCl}_3$ )  $\delta$  146.9, 138.5, 136.1, 134.1, 132.3, 131.1, 130.5, 130.3, 130.1, 129.8, 129.0, 128.52, 128.47, 128.23, 128.18, 128.15, 127.3, 126.7, 122.1; HRMS (ESI-TOF)  $m/z$ :  $[\text{M}+\text{H}]^+$  calcd for  $\text{C}_{27}\text{H}_{20}\text{BrN}_2$  451.0804, found 451.0819.

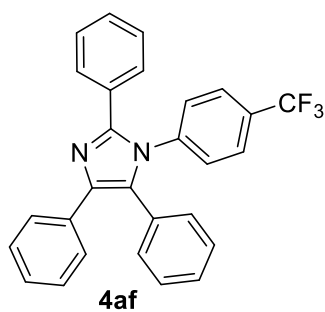

White solid (47.6 mg, 54%); mp 173-174 °C;  $^1\text{H}$  NMR (500 MHz,  $\text{CDCl}_3$ )  $\delta$  7.59 (d,  $J = 6.8$  Hz, 2H), 7.49 (d,  $J = 8.2$  Hz, 2H), 7.39 – 7.35 (m, 2H), 7.28 – 7.16 (m, 9H), 7.14 – 7.08 (m, 4H).  $^{13}\text{C}$  NMR (126 MHz,  $\text{CDCl}_3$ )  $\delta$  146.9, 140.1, 138.7, 134.0, 131.0, 130.4, 130.1, 129.9 (q,  $J = 31.6$  Hz), 129.0, 128.7, 128.60, 128.58, 128.30, 128.28, 128.2, 127.4, 126.8, 126.2 (q,  $J = 3.9$  Hz), 123.5 (q,  $J = 273.2$  Hz); HRMS (ESI-TOF)  $m/z$ :  $[\text{M}+\text{H}]^+$  calcd for  $\text{C}_{28}\text{H}_{20}\text{F}_3\text{N}_2$  441.1573, found 441.1566.

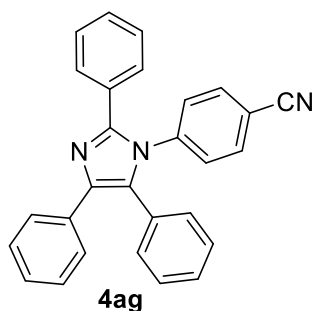

White solid (40.4 mg, 51%); mp 170-171 °C;  $^1\text{H}$  NMR (500 MHz,  $\text{CDCl}_3$ )  $\delta$  7.59 – 7.56 (m, 2H), 7.55 – 7.51 (m, 2H), 7.38 – 7.35 (m, 2H), 7.34 – 7.23 (m, 8H), 7.23 – 7.18 (m, 1H), 7.12 – 7.09 (m, 4H).  $^{13}\text{C}$  NMR (126 MHz,  $\text{CDCl}_3$ )  $\delta$  146.9, 140.9, 138.9, 133.8, 132.9, 131.0, 130.2, 129.9, 129.8, 129.1, 128.8, 128.7, 128.5, 128.4, 128.2, 127.4, 126.9, 117.8, 112.0; HRMS (ESI-TOF)  $m/z$ :  $[\text{M}+\text{H}]^+$  calcd for  $\text{C}_{28}\text{H}_{20}\text{N}_3$  398.1652, found 398.1677.

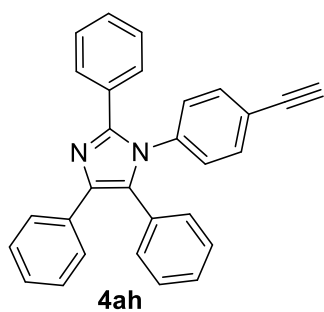

White solid (45.2 mg, 57%); mp 168-169 °C;  $^1\text{H}$  NMR (400 MHz,  $\text{CDCl}_3$ )  $\delta$  7.59 (d,  $J = 7.5$  Hz, 2H), 7.41 (d,  $J = 7.0$  Hz, 2H), 7.36 (d,  $J = 8.1$  Hz, 2H), 7.30 – 7.16 (m, 9H), 7.11 (d,  $J = 7.1$  Hz, 2H), 6.97 (d,  $J = 8.0$  Hz, 2H), 3.11 (s, 1H).  $^{13}\text{C}$  NMR (100 MHz,  $\text{CDCl}_3$ )  $\delta$  146.8, 138.5, 137.3, 134.2, 132.8, 131.0, 130.6, 130.3, 130.2, 129.0, 128.5, 128.4, 128.3, 128.20, 128.15, 128.1, 127.4, 126.7, 122.0, 82.4, 78.7; HRMS (ESI-TOF)  $m/z$ :  $[\text{M}+\text{H}]^+$  calcd for  $\text{C}_{29}\text{H}_{21}\text{N}_2$  397.1699, found 397.1703.

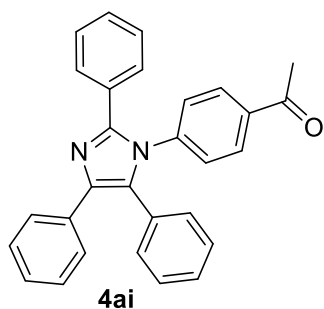

White solid (54.7 mg, 66%); mp 171-172 °C;  $^1\text{H}$  NMR (500 MHz,  $\text{CDCl}_3$ )  $\delta$  7.83 (d,  $J = 8.5$  Hz, 2H), 7.62 – 7.55 (m, 2H), 7.43 – 7.37 (m, 2H), 7.31 – 7.18 (m, 9H), 7.14 – 7.08 (m, 4H), 2.56 (s, 3H).  $^{13}\text{C}$  NMR (126 MHz,  $\text{CDCl}_3$ )  $\delta$  196.9, 146.9, 141.1, 138.7, 136.3, 134.1, 131.0, 130.5, 130.24, 130.15, 129.1, 129.0, 128.6, 128.5, 128.3, 128.24, 128.17, 127.4, 126.8, 26.6; HRMS (ESI-TOF)  $m/z$ :  $[\text{M}+\text{H}]^+$  calcd for  $\text{C}_{29}\text{H}_{23}\text{N}_2\text{O}$  415.1805, found 415.1835.

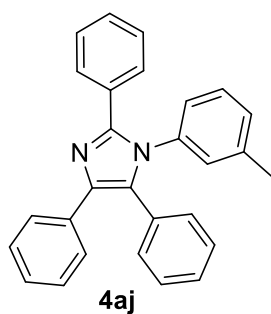

White solid (45.6 mg, 59%); mp 166-167 °C;  $^1\text{H}$  NMR (500 MHz,  $\text{CDCl}_3$ )  $\delta$  7.59 (dd,  $J = 7.4, 1.8$  Hz, 2H), 7.44 (dd,  $J = 7.7, 2.0$  Hz, 2H), 7.26 – 7.16 (m, 9H), 7.15 – 7.10 (m, 3H), 7.07 (d,  $J = 7.6$  Hz, 1H), 6.86 – 6.82 (m, 2H), 2.20 (s, 3H).  $^{13}\text{C}$  NMR (126 MHz,  $\text{CDCl}_3$ )  $\delta$  146.8, 139.0, 138.1, 137.0, 134.5, 131.1, 130.9, 130.7, 130.6, 129.0, 128.91, 128.85, 128.7, 128.23, 128.15, 128.1, 128.0, 127.9, 127.4, 126.5, 125.5, 21.1; HRMS (ESI-TOF)  $m/z$ :  $[\text{M}+\text{H}]^+$  calcd for  $\text{C}_{28}\text{H}_{23}\text{N}_2$  387.1856, found 387.1847.

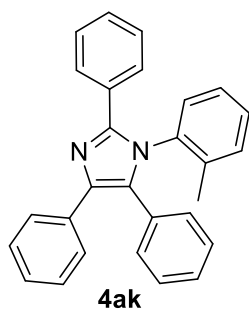

White solid (40.9 mg, 53%); mp 164-165 °C;  $^1\text{H}$  NMR (500 MHz,  $\text{CDCl}_3$ )  $\delta$  7.65 – 7.61 (m, 2H), 7.47 – 7.43 (m, 2H), 7.27 – 7.17 (m, 10H), 7.16 – 7.13 (m, 2H), 7.13 – 7.10 (m, 3H), 1.88 (s, 3H).  $^{13}\text{C}$  NMR (126 MHz,  $\text{CDCl}_3$ )  $\delta$  146.7, 138.3, 136.2, 136.0, 134.4, 131.0, 130.74, 130.67, 130.6, 130.5, 129.3, 129.0, 128.3, 128.2, 128.12, 128.09, 127.9, 127.3, 126.62, 126.56, 17.6; HRMS (ESI-TOF)  $m/z$ :  $[\text{M}+\text{H}]^+$  calcd for  $\text{C}_{28}\text{H}_{23}\text{N}_2$  387.1856, found 387.1834.

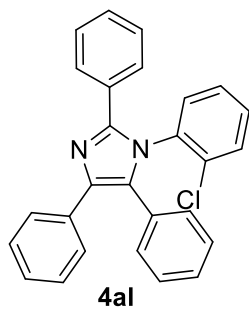

White solid (49.6 mg, 61%); mp 162-163 °C;  $^1\text{H}$  NMR (400 MHz,  $\text{CDCl}_3$ )  $\delta$  7.63 (d,  $J = 7.6$  Hz, 2H), 7.50 – 7.44 (m, 2H), 7.37 – 7.29 (m, 2H), 7.28 – 7.15 (m, 13H).  $^{13}\text{C}$  NMR (100 MHz,  $\text{CDCl}_3$ )  $\delta$  147.1, 138.3, 135.1, 134.2, 133.3, 130.9, 130.84, 130.80, 130.5, 130.32, 130.25, 130.2, 128.5, 128.34, 128.31, 128.24, 128.16, 128.1, 127.4, 127.2, 126.6; HRMS (ESI-TOF)  $m/z$ :  $[\text{M}+\text{H}]^+$  calcd for  $\text{C}_{27}\text{H}_{20}\text{ClN}_2$  407.1310, found 407.1301.

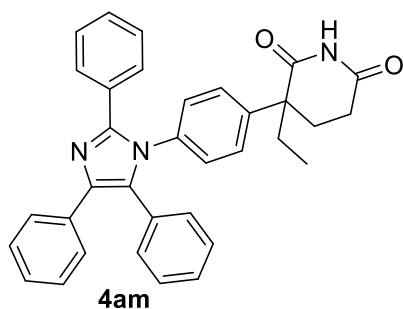

White solid (52.2 mg, 51%); mp 177-178 °C;  $^1\text{H}$  NMR (400 MHz,  $\text{CDCl}_3$ )  $\delta$  8.40 (s, 1H), 7.63 – 7.55 (m, 2H), 7.41 – 7.36 (m, 2H), 7.28 – 7.13 (m, 11H), 7.12 – 7.06 (m, 2H), 7.05 – 7.00 (m, 2H), 2.65 – 2.50 (m, 1H), 2.30 – 2.13 (m, 3H), 2.02 – 1.85 (m, 2H), 0.81 (t,  $J = 7.4$  Hz, 3H).  $^{13}\text{C}$  NMR (100 MHz,  $\text{CDCl}_3$ )  $\delta$  174.7, 172.1, 146.8, 139.0, 138.3, 136.5, 134.1, 131.0, 130.6, 130.3, 130.2, 128.94, 128.87, 128.4, 128.3, 128.11, 128.09, 128.06, 127.3, 126.9, 126.6, 50.8, 32.7, 29.0, 27.4, 8.9; HRMS (ESI-TOF)  $m/z$ :  $[\text{M}+\text{H}]^+$  calcd for  $\text{C}_{34}\text{H}_{30}\text{N}_3\text{O}_2$  512.2333, found 512.2340.

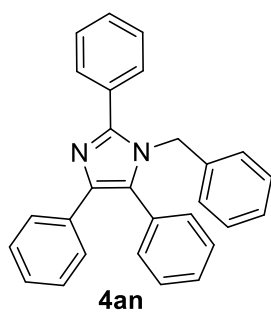

White solid (53.3 mg, 69%); mp 167-168 °C;  $^1\text{H}$  NMR (400 MHz,  $\text{CDCl}_3$ )  $\delta$  7.69 – 7.62 (m, 2H), 7.61 – 7.54 (m, 2H), 7.43 – 7.37 (m, 3H), 7.37 – 7.27 (m, 3H), 7.25 – 7.17 (m, 7H), 7.17 – 7.11 (m, 1H), 6.84 – 6.78 (m, 2H), 5.11 (s, 2H).  $^{13}\text{C}$  NMR (100 MHz,  $\text{CDCl}_3$ )  $\delta$  148.1, 138.0, 137.5, 134.4, 131.1, 131.0, 130.9, 130.0, 129.1, 128.9, 128.8, 128.59, 128.57, 128.5, 128.1, 127.3, 126.8, 126.3, 126.0, 48.3; HRMS (ESI-TOF)  $m/z$ :  $[\text{M}+\text{H}]^+$  calcd for  $\text{C}_{28}\text{H}_{23}\text{N}_2$  387.1856, found 387.1885.

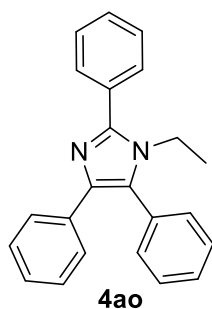

White solid (40.2 mg, 62%); mp 172-173 °C;  $^1\text{H}$  NMR (500 MHz,  $\text{CDCl}_3$ )  $\delta$  7.74 – 7.69 (m, 2H), 7.55 – 7.52 (m, 2H), 7.52 – 7.47 (m, 5H), 7.47 – 7.43 (m, 3H), 7.22 – 7.18 (m, 2H), 7.15 – 7.11 (m, 1H), 3.95 (q,  $J = 7.2$  Hz, 2H), 1.02 (t,  $J = 7.2$  Hz, 3H).  $^{13}\text{C}$  NMR (100 MHz,  $\text{CDCl}_3$ )  $\delta$  147.3, 137.7, 134.5, 131.5, 131.3, 131.0, 129.3, 129.1, 129.0, 128.8, 128.61, 128.57, 128.0, 126.7, 126.1, 39.6, 16.2; HRMS (ESI-TOF)  $m/z$ :  $[\text{M}+\text{H}]^+$  calcd for  $\text{C}_{23}\text{H}_{21}\text{N}_2$  325.1699, found 325.1686.

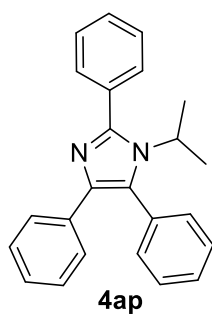

White solid (33.8 mg, 50%); mp 175-176 °C;  $^1\text{H}$  NMR (500 MHz,  $\text{CDCl}_3$ )  $\delta$  7.66 – 7.63 (m, 2H), 7.51 – 7.48 (m, 6H), 7.48 – 7.44 (m, 4H), 7.18 – 7.14 (m, 2H), 7.12 – 7.08 (m, 1H), 4.47 (hept,  $J = 7.0$  Hz, 1H), 1.25 (d,  $J = 7.0$  Hz, 6H).  $^{13}\text{C}$  NMR (100 MHz,  $\text{CDCl}_3$ )  $\delta$  147.5, 137.8, 134.5, 132.4, 132.3, 132.1, 130.0, 128.9, 128.8, 128.7, 128.3, 127.9, 126.6, 126.0, 49.3, 23.2; HRMS (ESI-TOF)  $m/z$ :  $[\text{M}+\text{H}]^+$  calcd for  $\text{C}_{24}\text{H}_{23}\text{N}_2$  339.1856, found 339.1867.

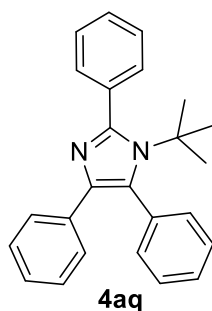

White solid (22.6 mg, 32%); mp 177-178 °C;  $^1\text{H}$  NMR (500 MHz,  $\text{CDCl}_3$ )  $\delta$  7.57 – 7.53 (m, 2H), 7.49 – 7.46 (m, 2H), 7.45 – 7.43 (m, 3H), 7.42 – 7.40 (m, 3H), 7.29 – 7.25 (m, 2H), 7.12 – 7.03 (m, 3H), 1.31 (s, 9H).  $^{13}\text{C}$  NMR (100 MHz,  $\text{CDCl}_3$ )  $\delta$  148.1, 137.9, 136.8, 135.0, 134.7, 132.4, 130.2, 129.8, 128.6, 128.5, 128.4, 128.0, 127.7, 127.2, 125.9, 59.8, 33.4; HRMS (ESI-TOF)  $m/z$ :  $[\text{M}+\text{H}]^+$  calcd for  $\text{C}_{25}\text{H}_{25}\text{N}_2$  353.2012, found 353.2010.



## 6. X-ray structure of product 4k

X-ray structure of 4k with thermal ellipsoids shown at the 30% probability level

(CCDC 2165867)

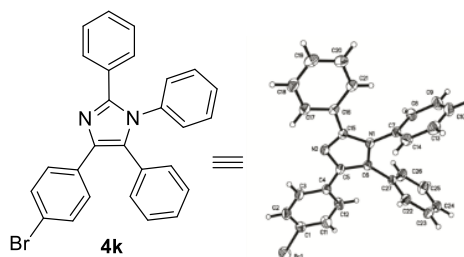

### Crystal data and structure refinement for product 4k

|                                  |                                                   |                             |
|----------------------------------|---------------------------------------------------|-----------------------------|
| Identification code              | <b>4k</b>                                         |                             |
| Empirical formula                | C <sub>27</sub> H <sub>19</sub> Br N <sub>2</sub> |                             |
| Formula weight                   | 451.35                                            |                             |
| Temperature                      | 296(2) K                                          |                             |
| Wavelength                       | 0.71073 Å                                         |                             |
| Crystal system                   | Triclinic                                         |                             |
| Space group                      | P-1                                               |                             |
| Unit cell dimensions             | $a = 9.7856(7)$ Å                                 | $a = 94.494(2)^\circ$       |
|                                  | $b = 10.4391(7)$ Å                                | $\beta = 95.410(2)^\circ$   |
|                                  | $c = 11.5402(7)$ Å                                | $\gamma = 114.329(2)^\circ$ |
| Volume                           | 1060.43(12) Å <sup>3</sup>                        |                             |
| Z                                | 2                                                 |                             |
| Density (calculated)             | 1.414 Mg/m <sup>3</sup>                           |                             |
| Absorption coefficient           | 1.954 mm <sup>-1</sup>                            |                             |
| F(000)                           | 460                                               |                             |
| Crystal size                     | 0.300 x 0.220 x 0.200 mm <sup>3</sup>             |                             |
| Theta range for data collection  | 2.159 to 27.517 °                                 |                             |
| Index ranges                     | -12 ≤ h ≤ 12, -13 ≤ k ≤ 13, -14 ≤ l ≤ 14          |                             |
| Reflections collected            | 16521                                             |                             |
| Independent reflections          | 4840 [R(int) = 0.0307]                            |                             |
| Completeness to theta = 25.242 ° | 99.2 %                                            |                             |
| Absorption correction            | Semi-empirical from equivalents                   |                             |
| Max. and min. transmission       | 0.7456 and 0.5116                                 |                             |
| Refinement method                | Full-matrix least-squares on F <sup>2</sup>       |                             |

|                                   |                                    |
|-----------------------------------|------------------------------------|
| Data / restraints / parameters    | 4840 / 0 / 271                     |
| Goodness-of-fit on F <sup>2</sup> | 1.035                              |
| Final R indices [I>2sigma(I)]     | R1 = 0.0394, wR2 = 0.0957          |
| R indices (all data)              | R1 = 0.0611, wR2 = 0.1055          |
| Extinction coefficient            | n/a                                |
| Largest diff. peak and hole       | 0.589 and -0.451 e.Å <sup>-3</sup> |

## 7. References

- (1) J. Ke, Y. Tang, H. Yi, Y. Li, Y. Cheng, C. Liu and A. Lei, Copper-Catalyzed Radical/Radical C<sub>sp3</sub>-H/P-H Cross-Coupling:  $\alpha$ -Phosphorylation of Aryl Ketone O-Acetyloximes. *Angew. Chem., Int. Ed.*, 2015, **54**, 6604-6607.

## 8. NMR spectra

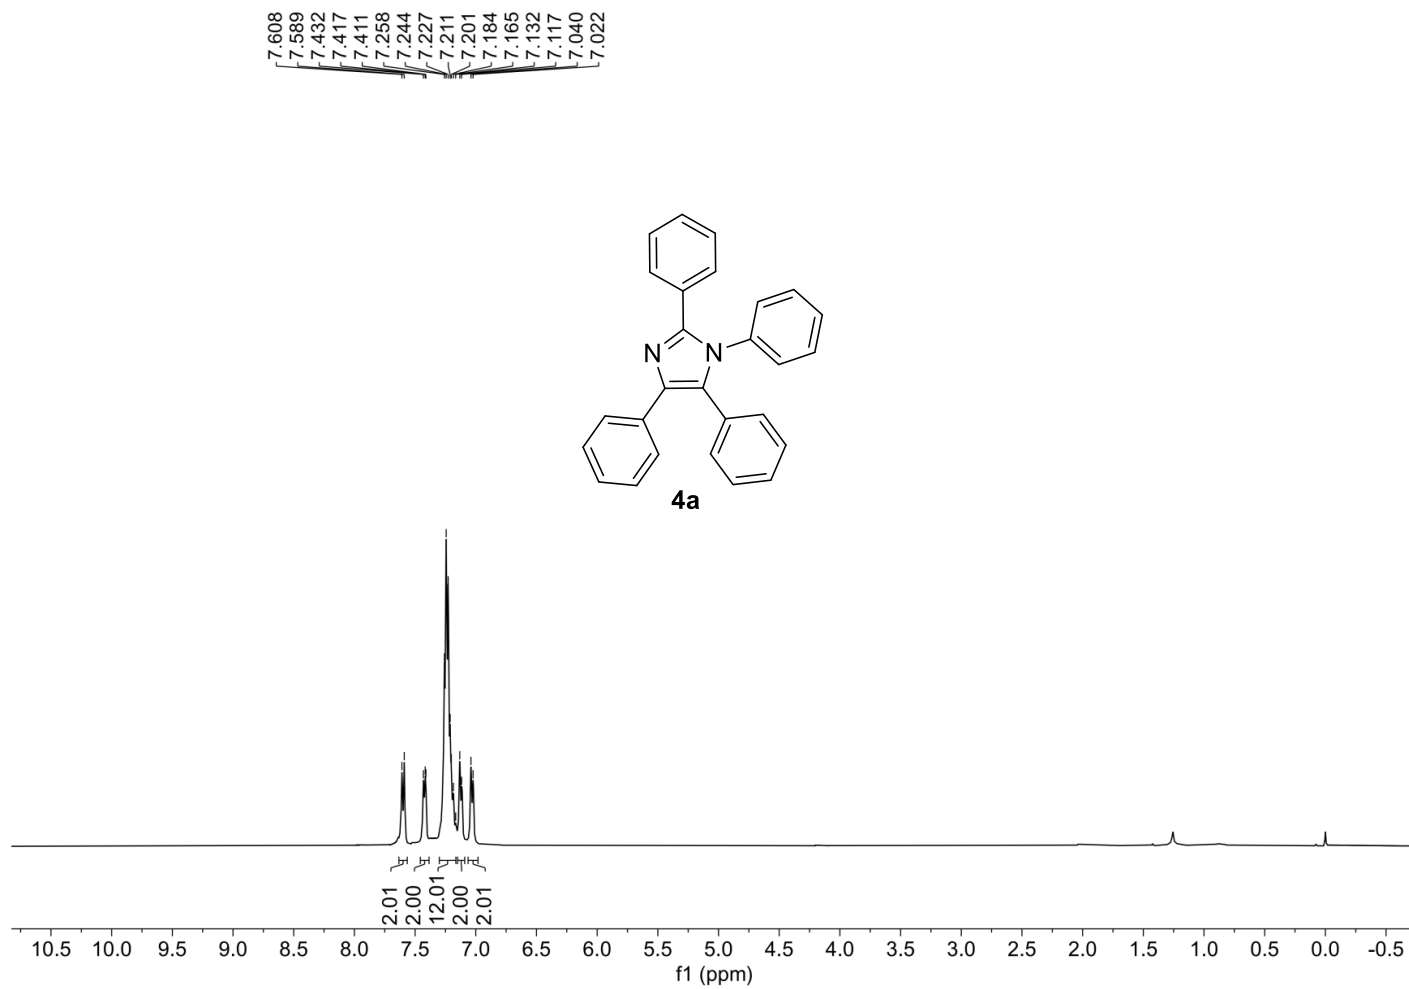

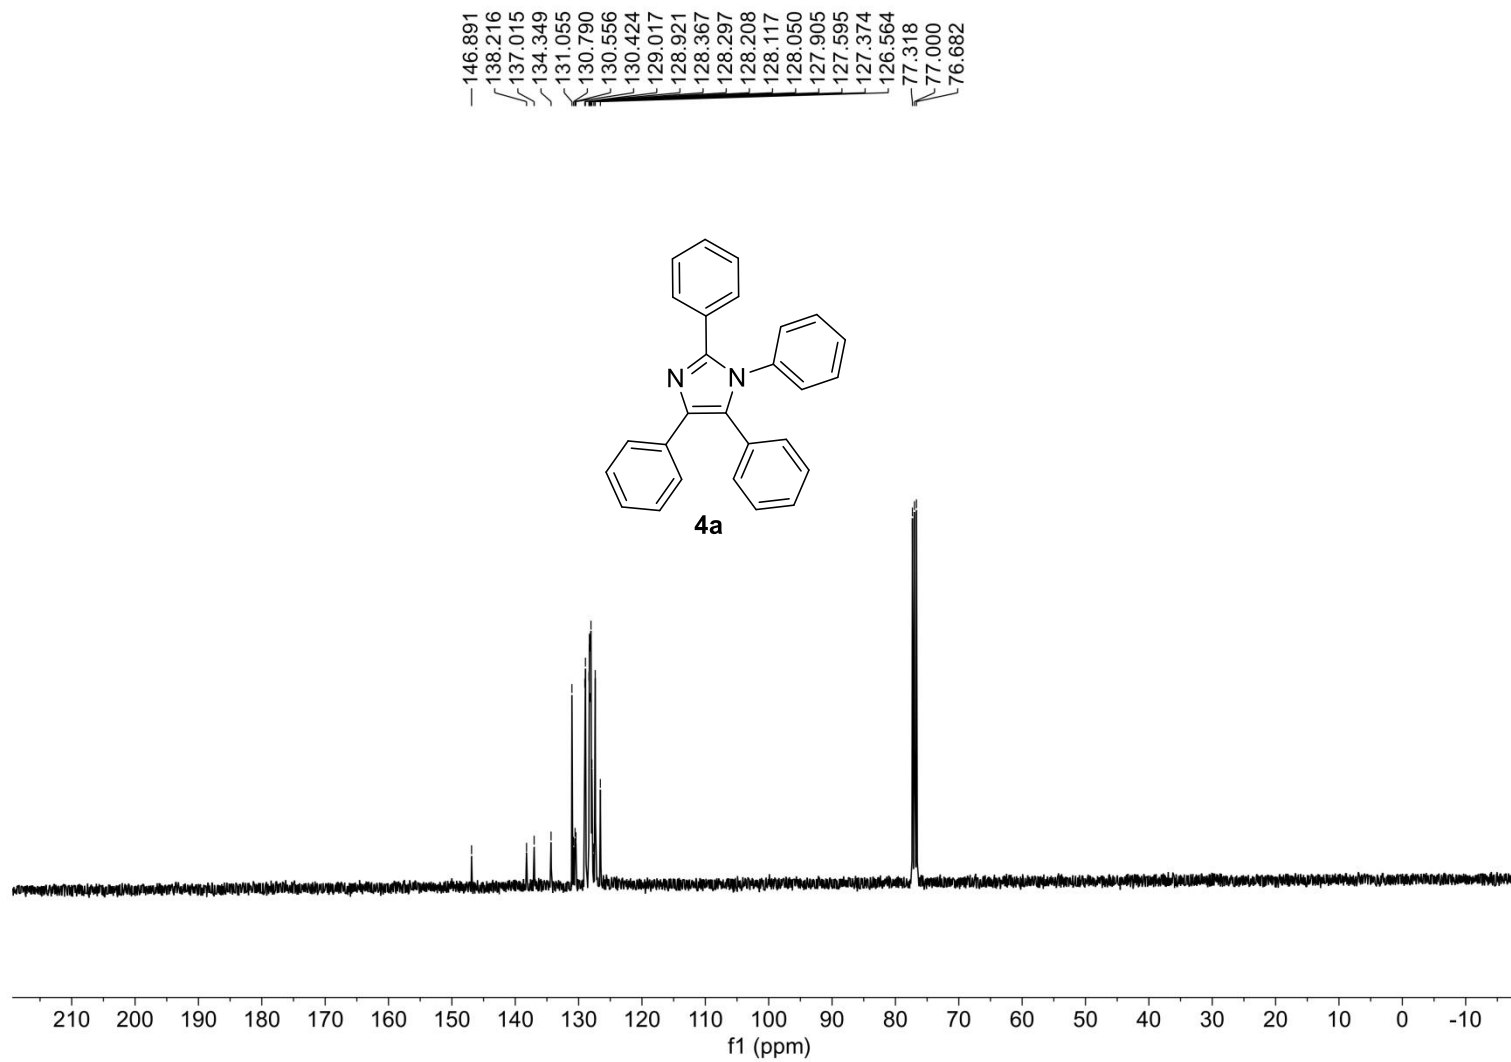

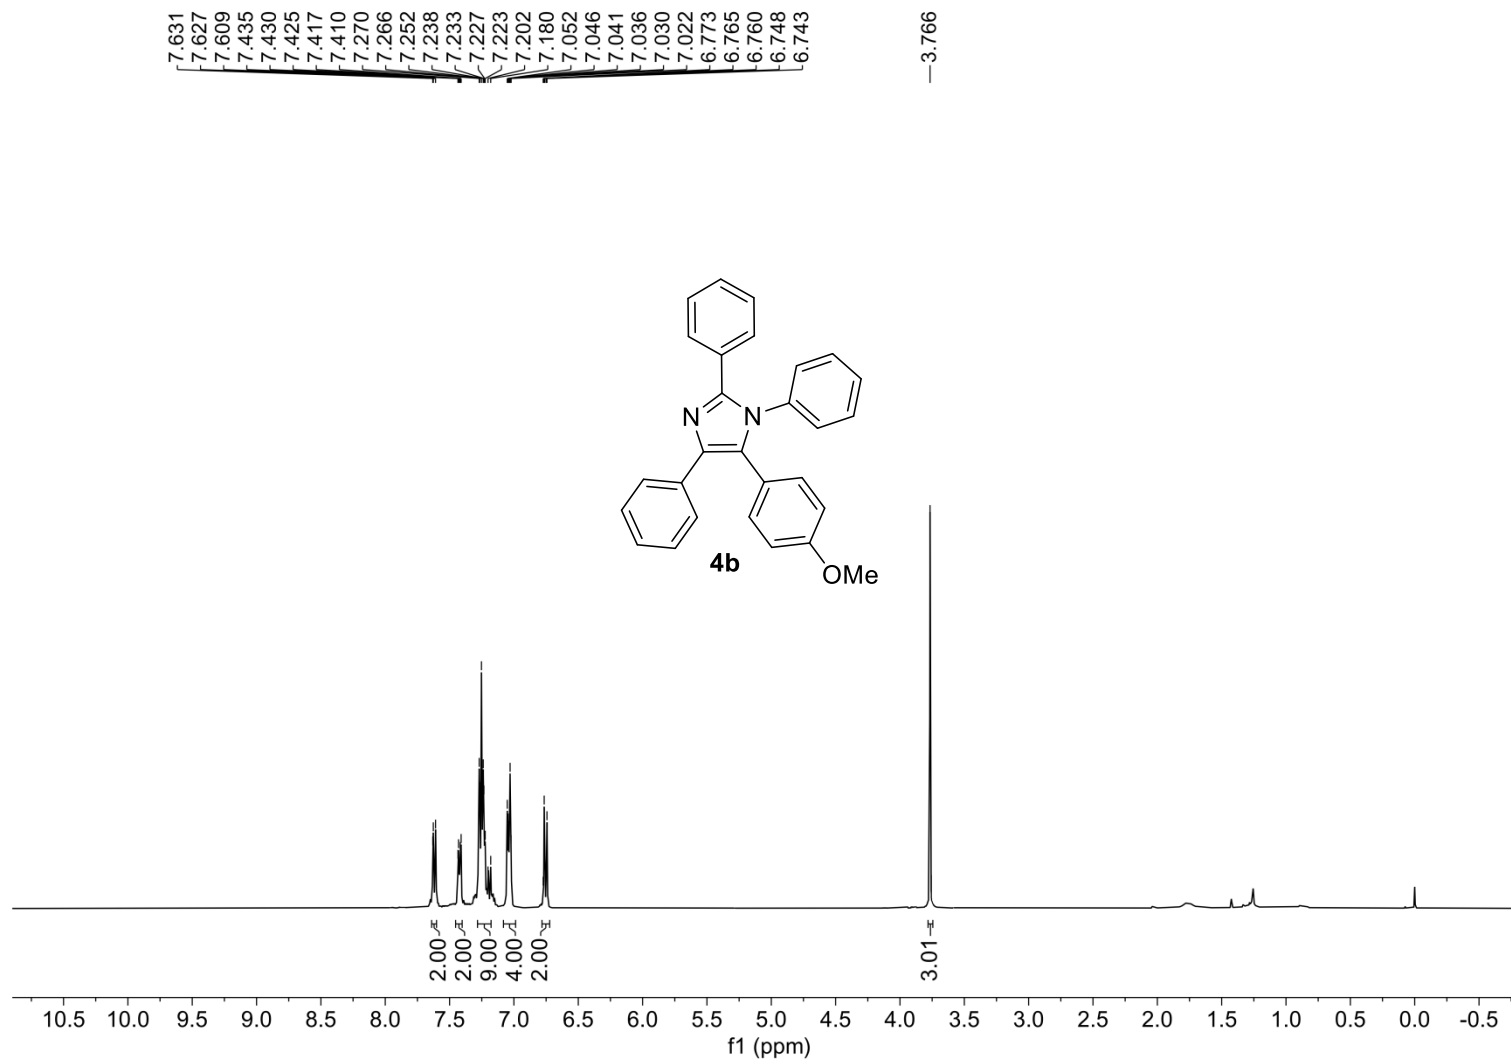

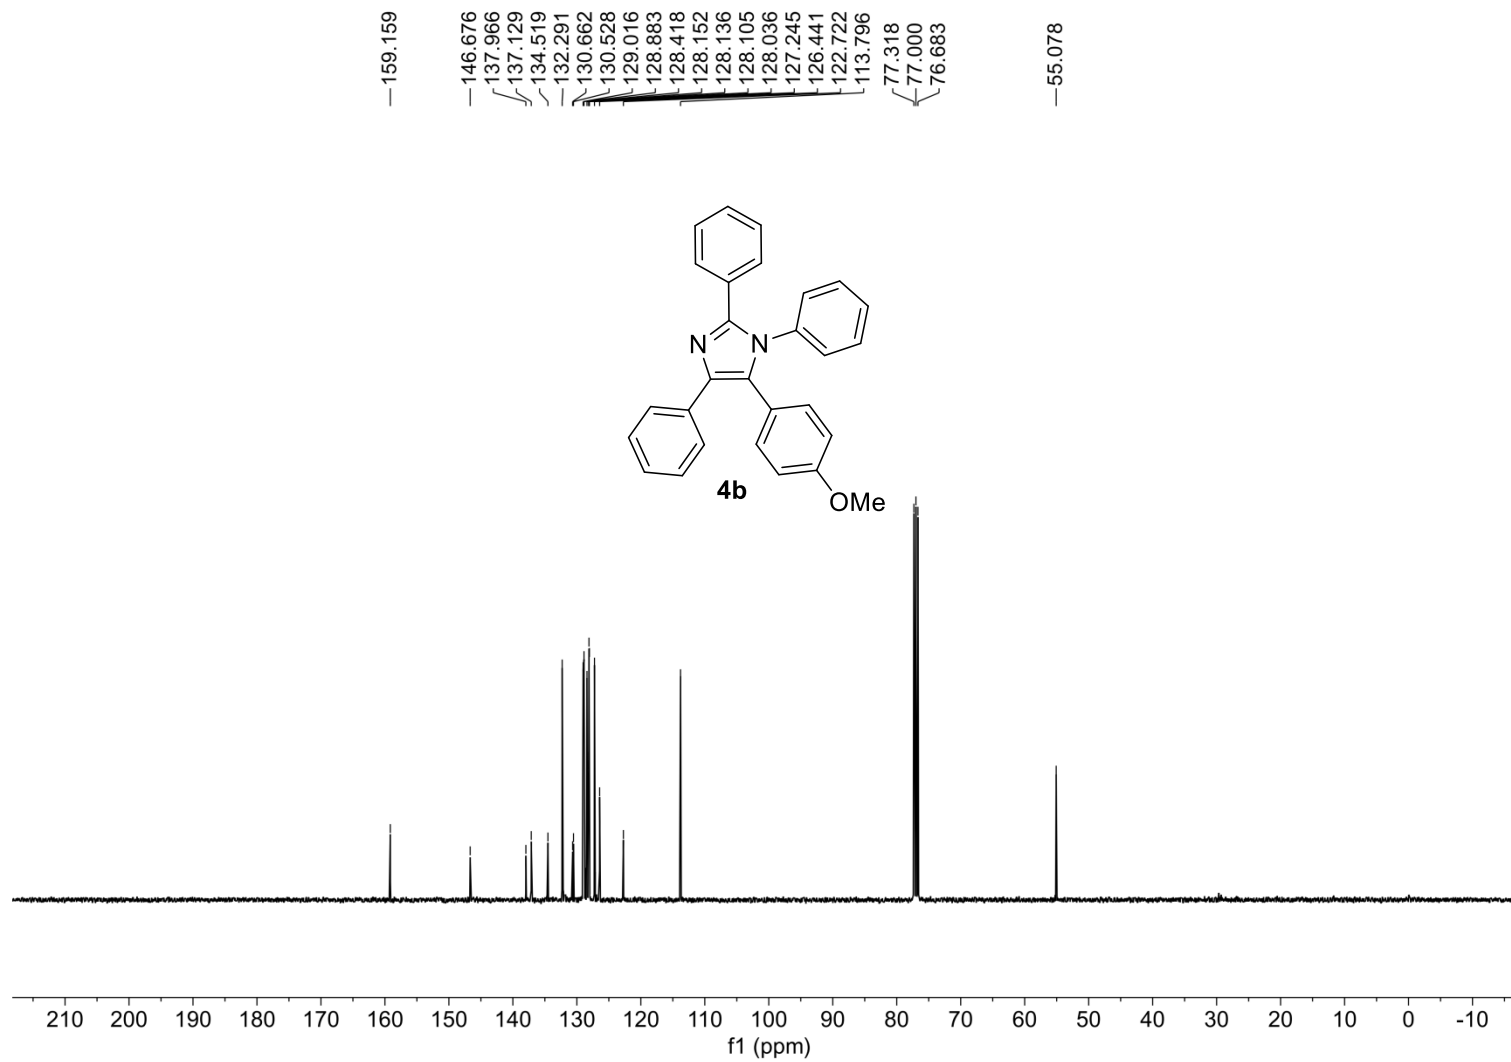

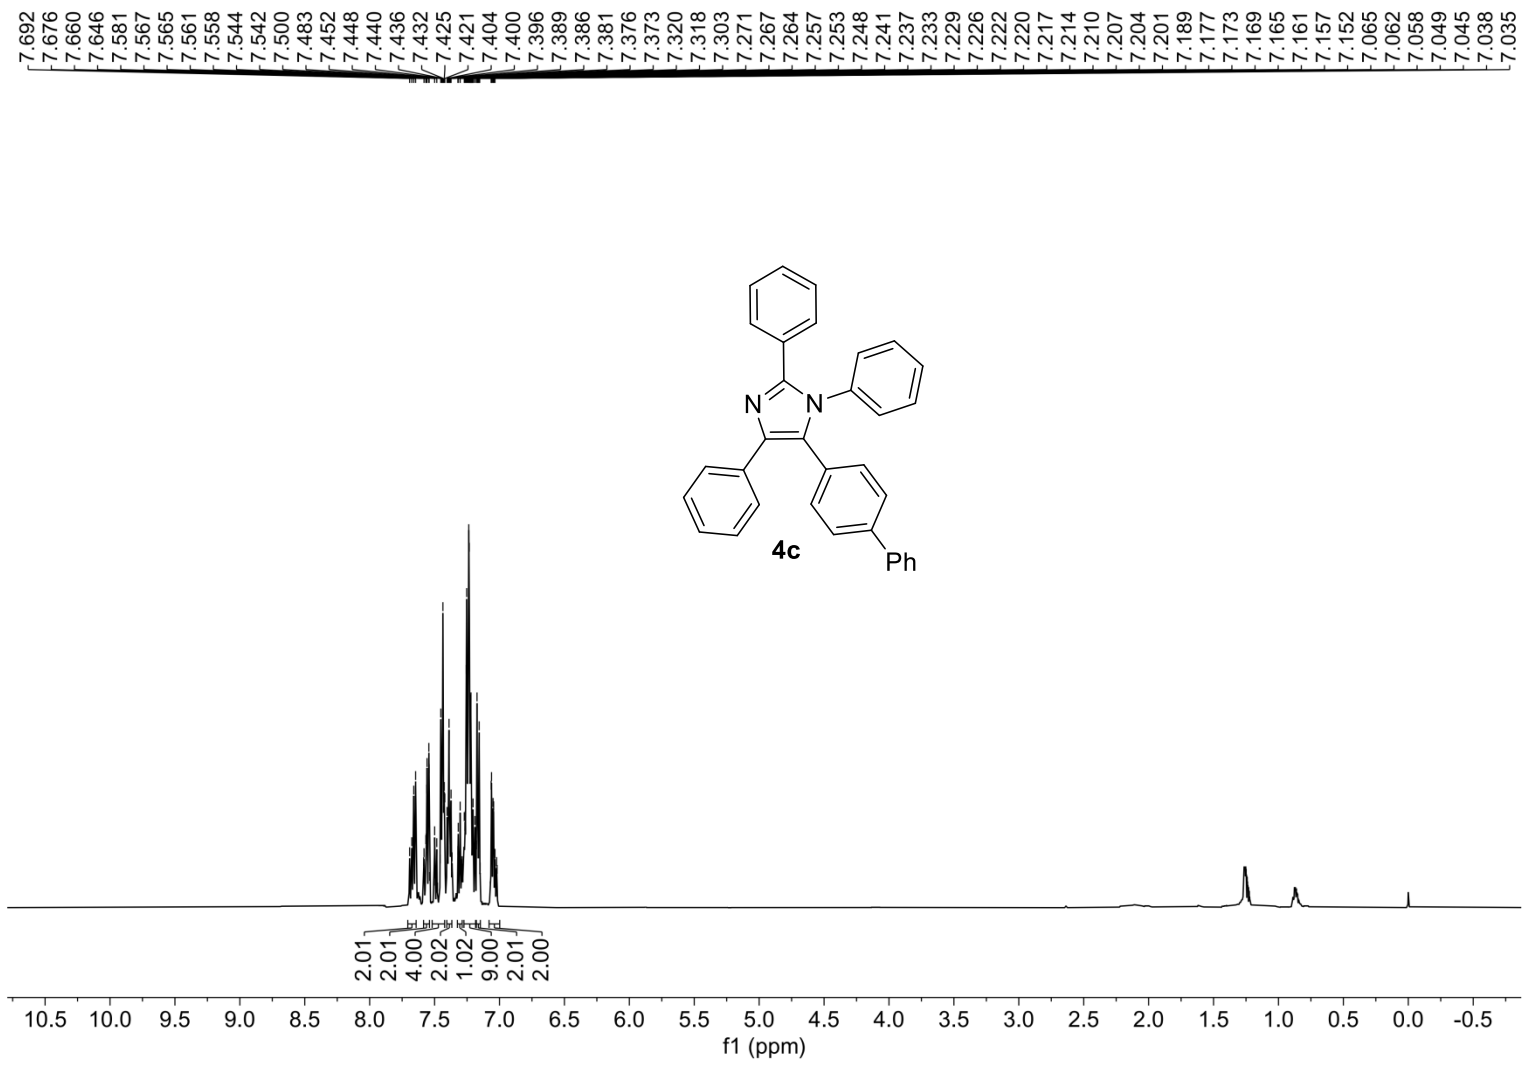

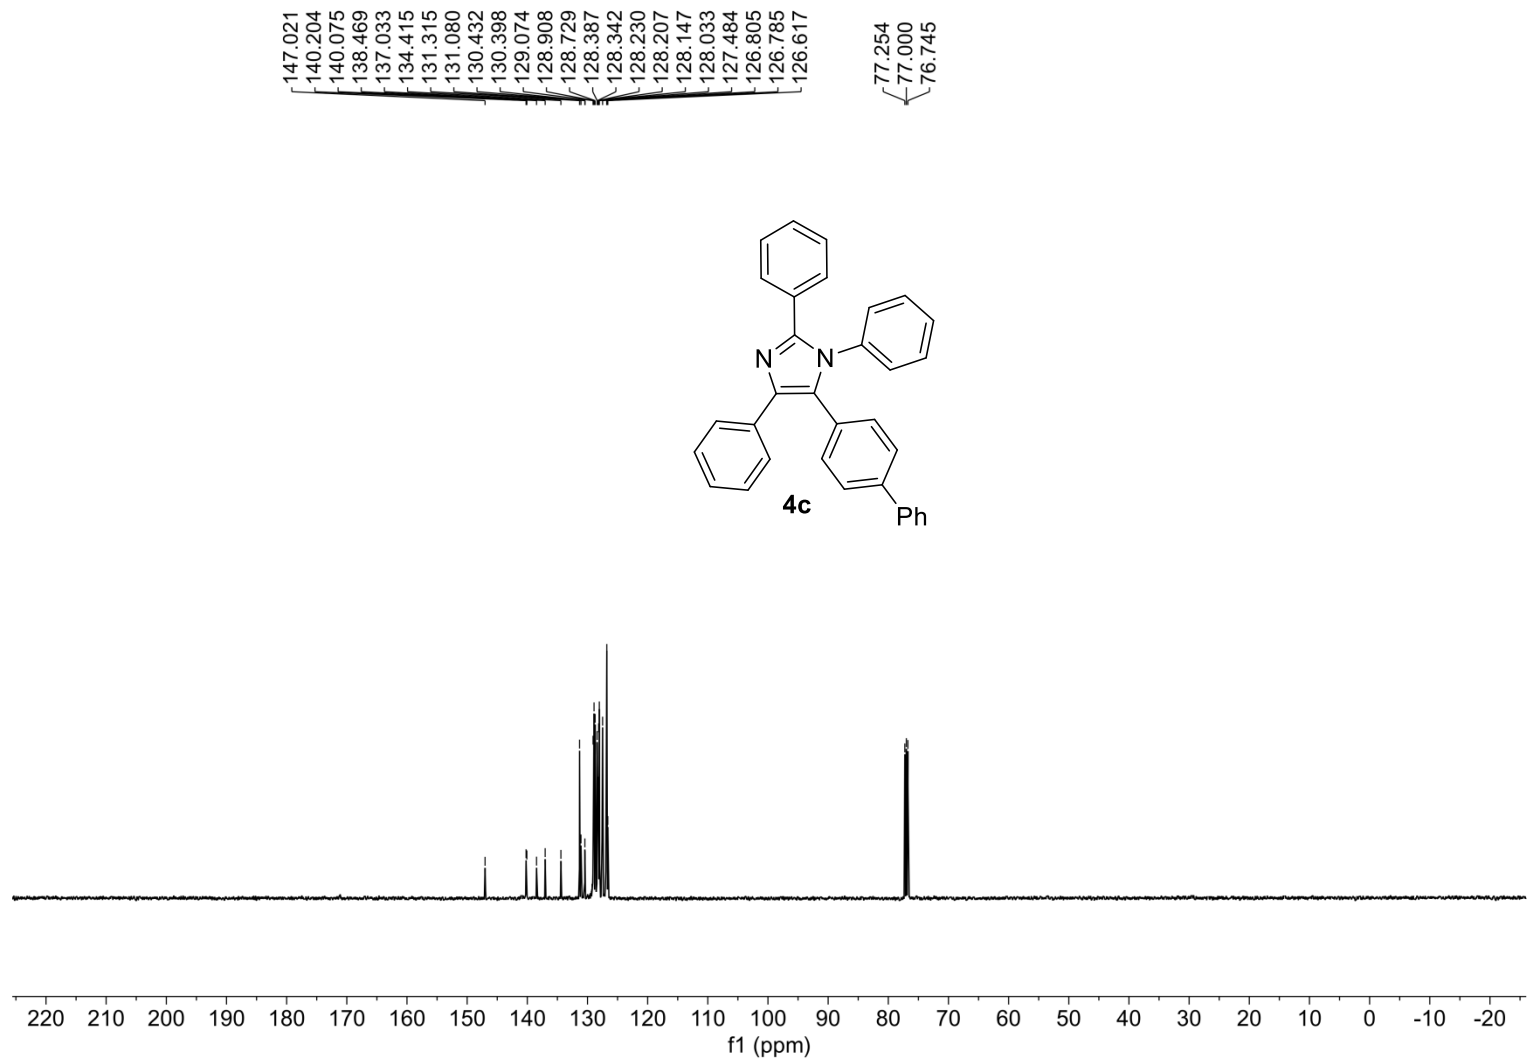



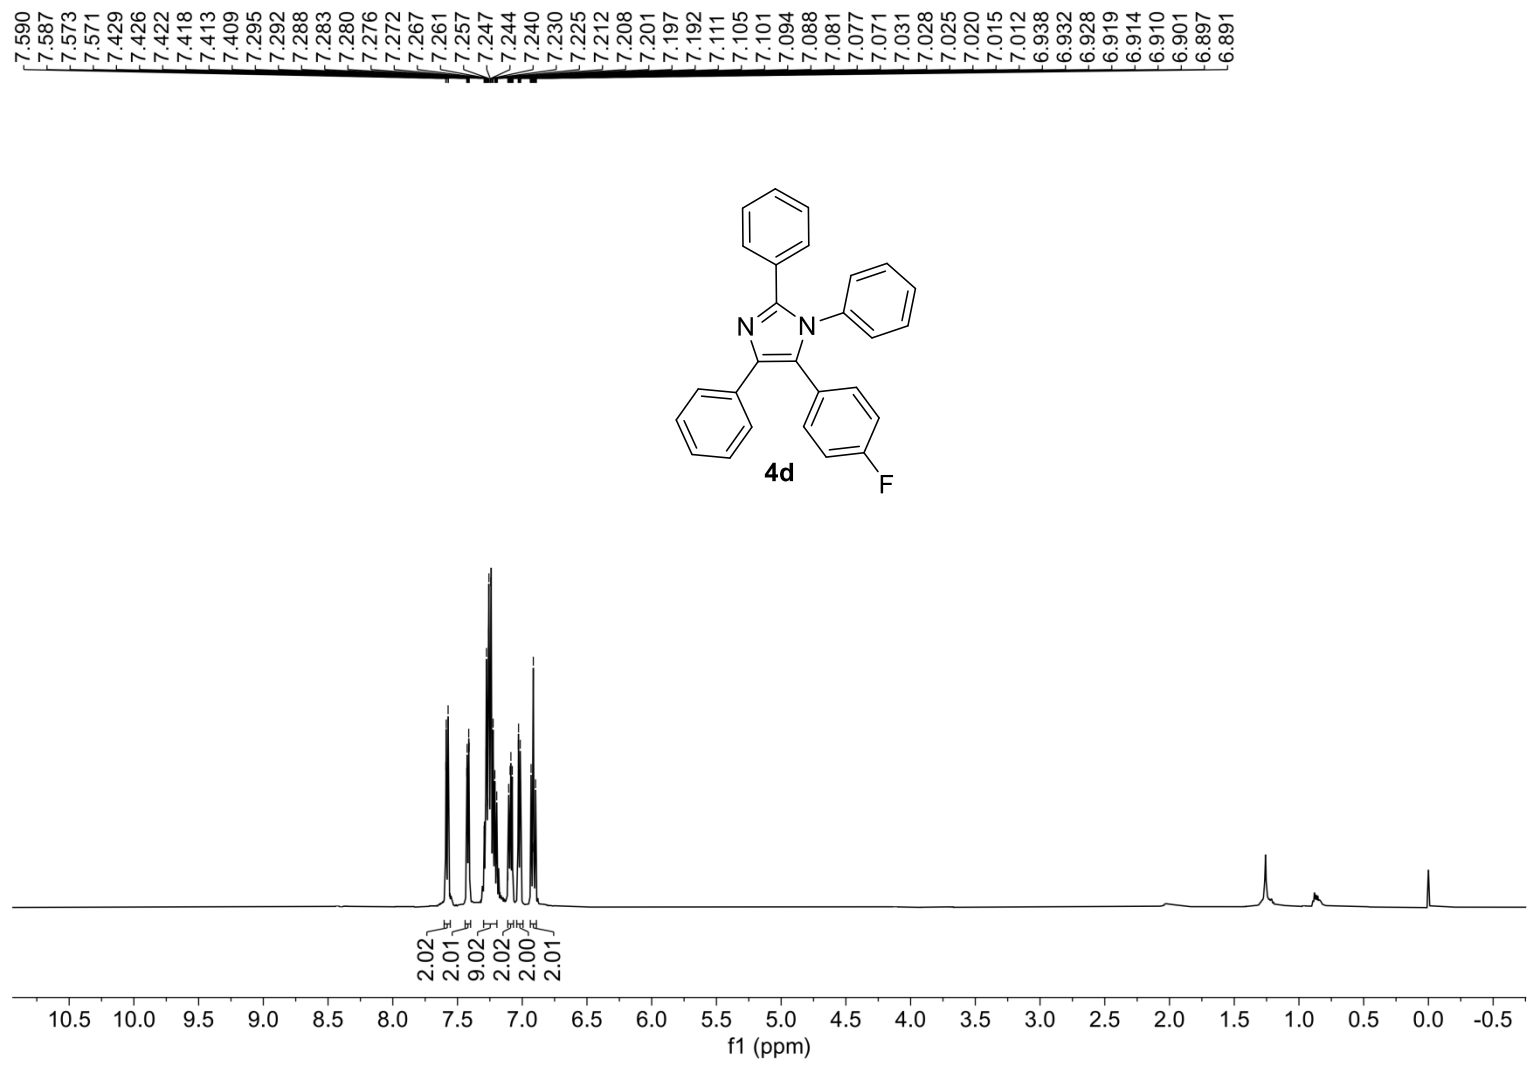

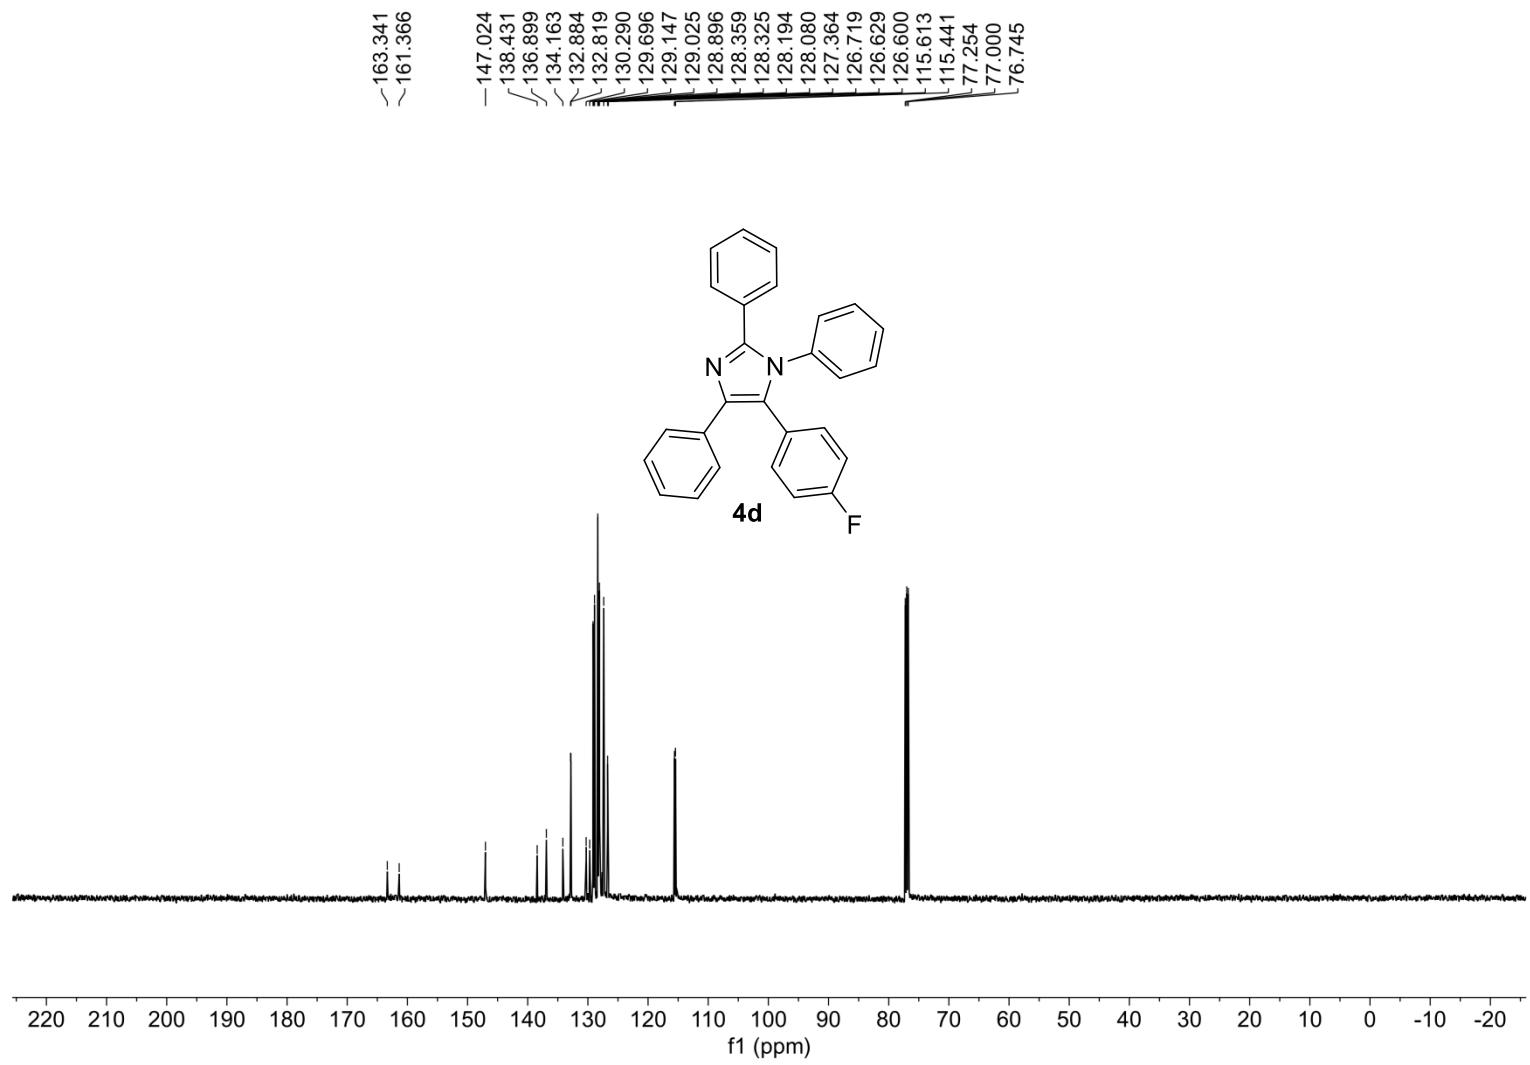

7.585  
7.581  
7.577  
7.570  
7.567  
7.565  
7.430  
7.425  
7.422  
7.418  
7.413  
7.409  
7.405  
7.313  
7.308  
7.305  
7.299  
7.295  
7.290  
7.288  
7.284  
7.274  
7.270  
7.259  
7.256  
7.250  
7.235  
7.205  
7.200  
7.196  
7.187  
7.183  
7.178  
7.057  
7.051  
7.046  
7.041  
7.038  
7.034  
7.029  
7.025  
7.021

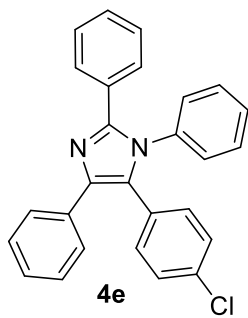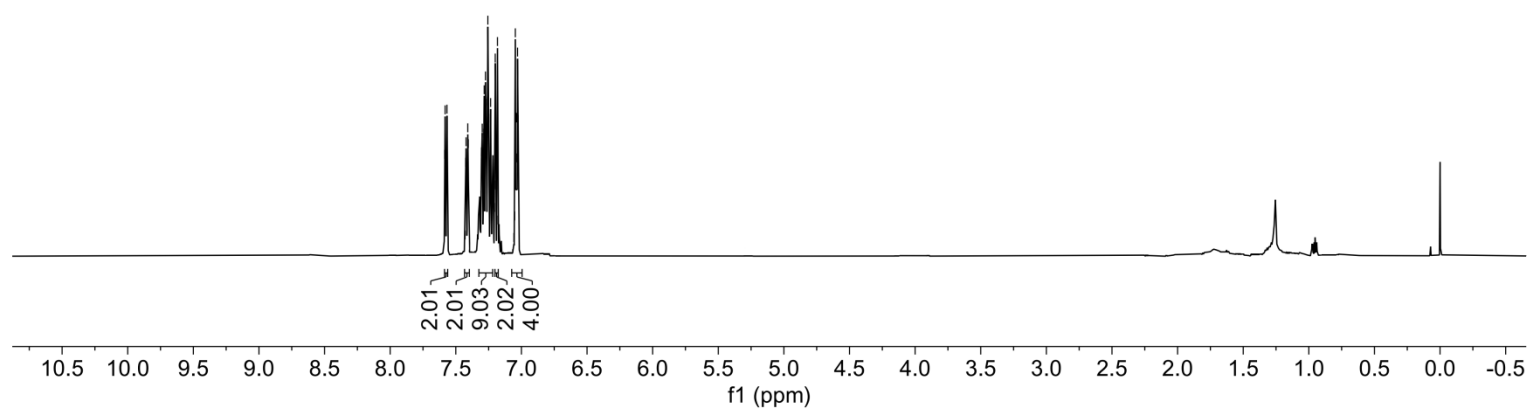

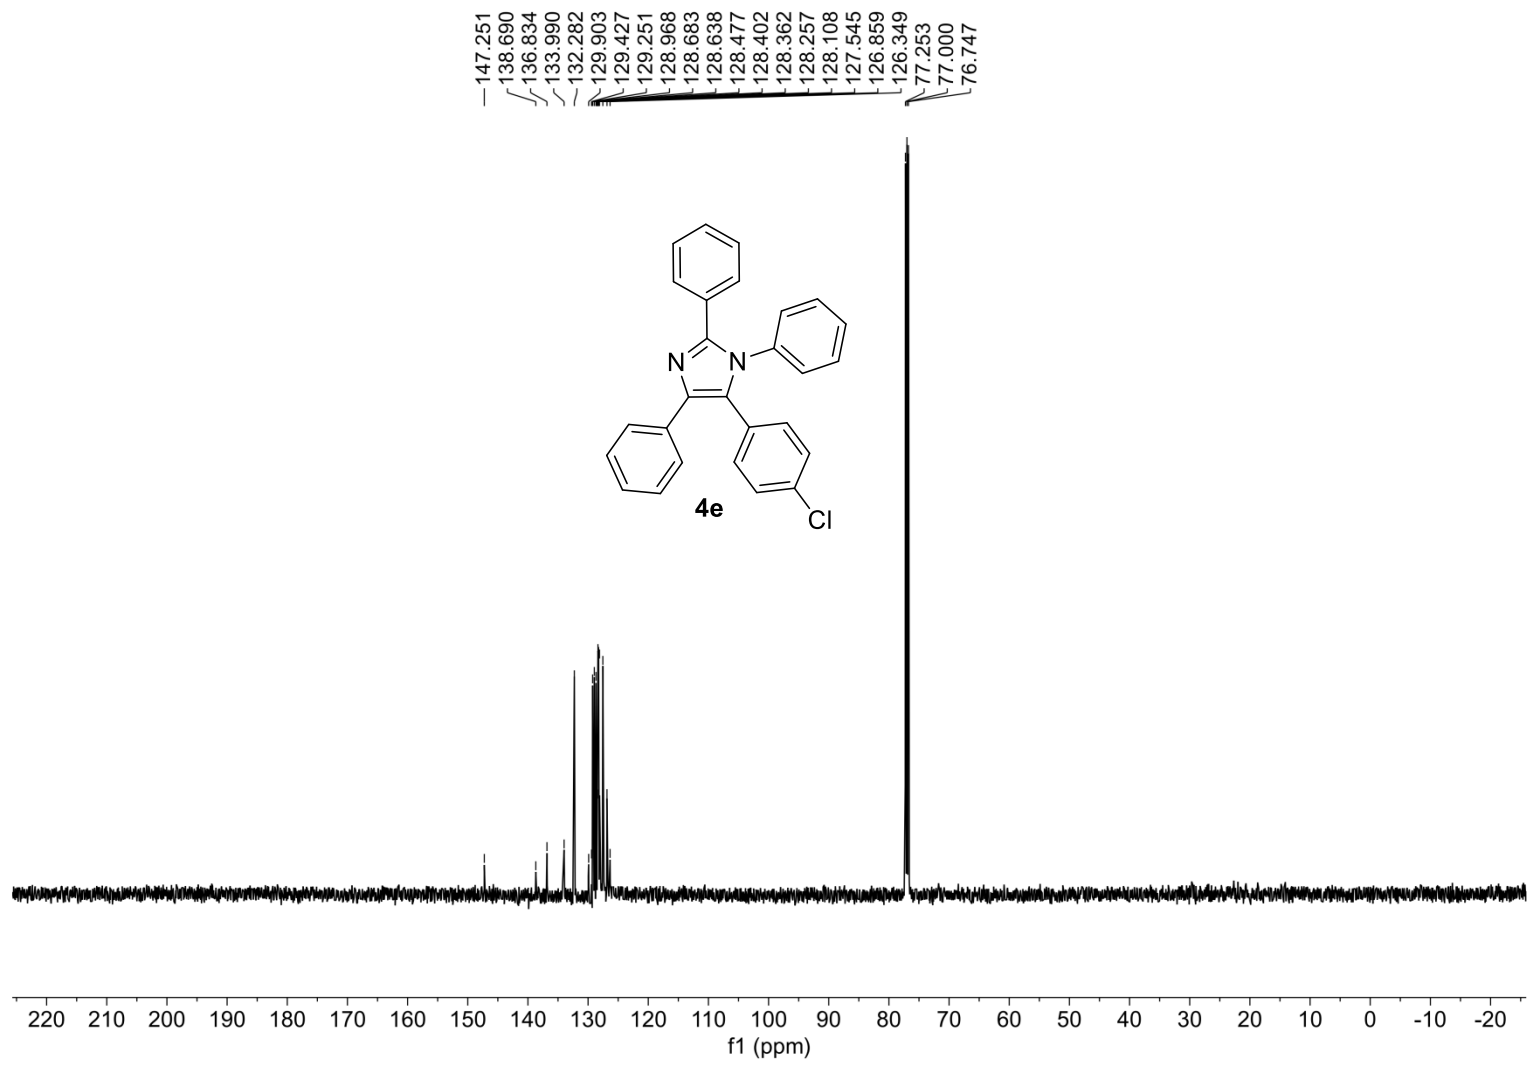

7.580  
7.577  
7.573  
7.566  
7.563  
7.561  
7.556  
7.429  
7.420  
7.415  
7.412  
7.409  
7.404  
7.399  
7.396  
7.349  
7.344  
7.340  
7.331  
7.327  
7.323  
7.320  
7.307  
7.301  
7.298  
7.294  
7.288  
7.286  
7.284  
7.280  
7.277  
7.270  
7.267  
7.263  
7.259  
7.254  
7.250  
7.248  
7.246  
7.240  
7.237  
7.229  
7.226  
7.216  
7.212  
7.208  
7.200  
7.197  
7.194  
7.034  
7.032  
7.028  
7.023  
7.018  
7.015  
6.982  
6.977  
6.973  
6.964  
6.960  
6.955

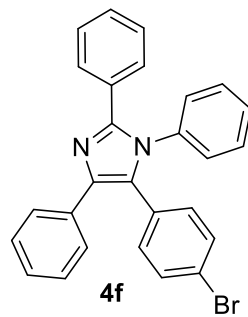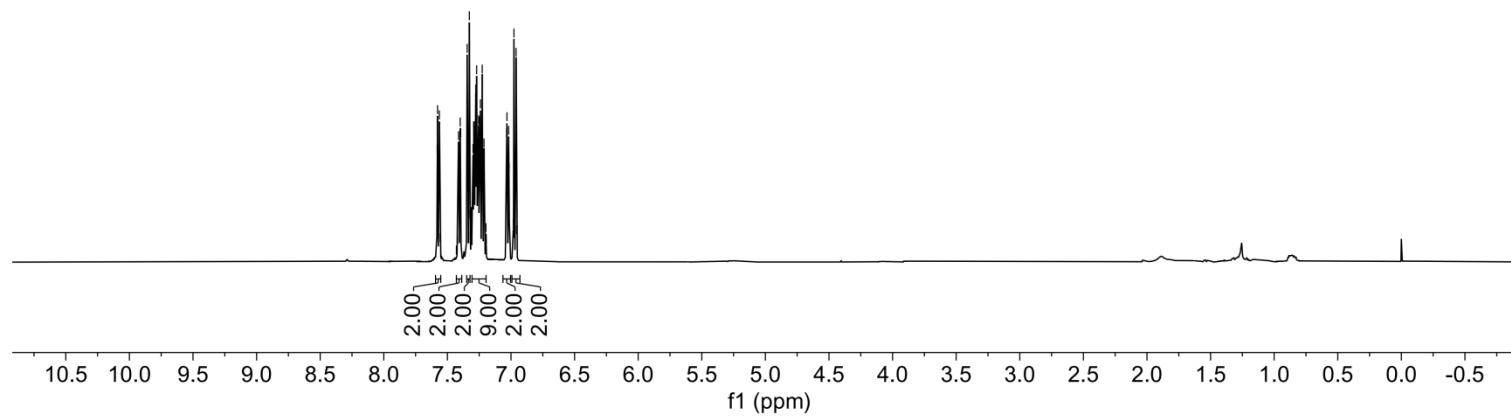

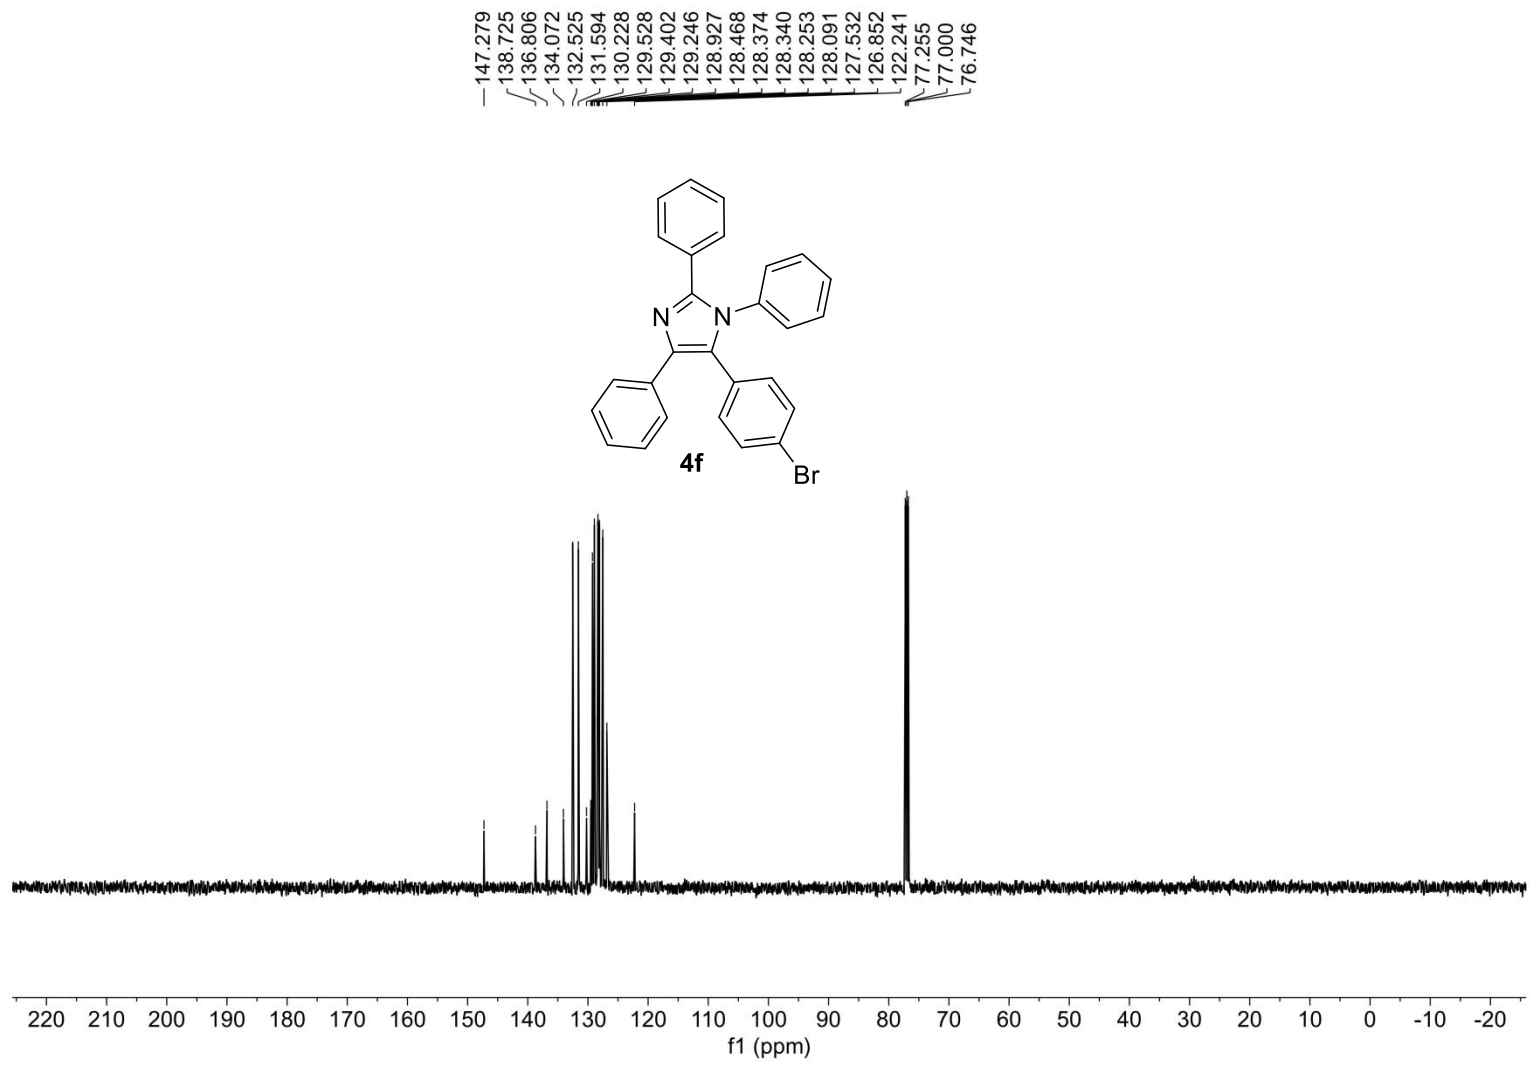

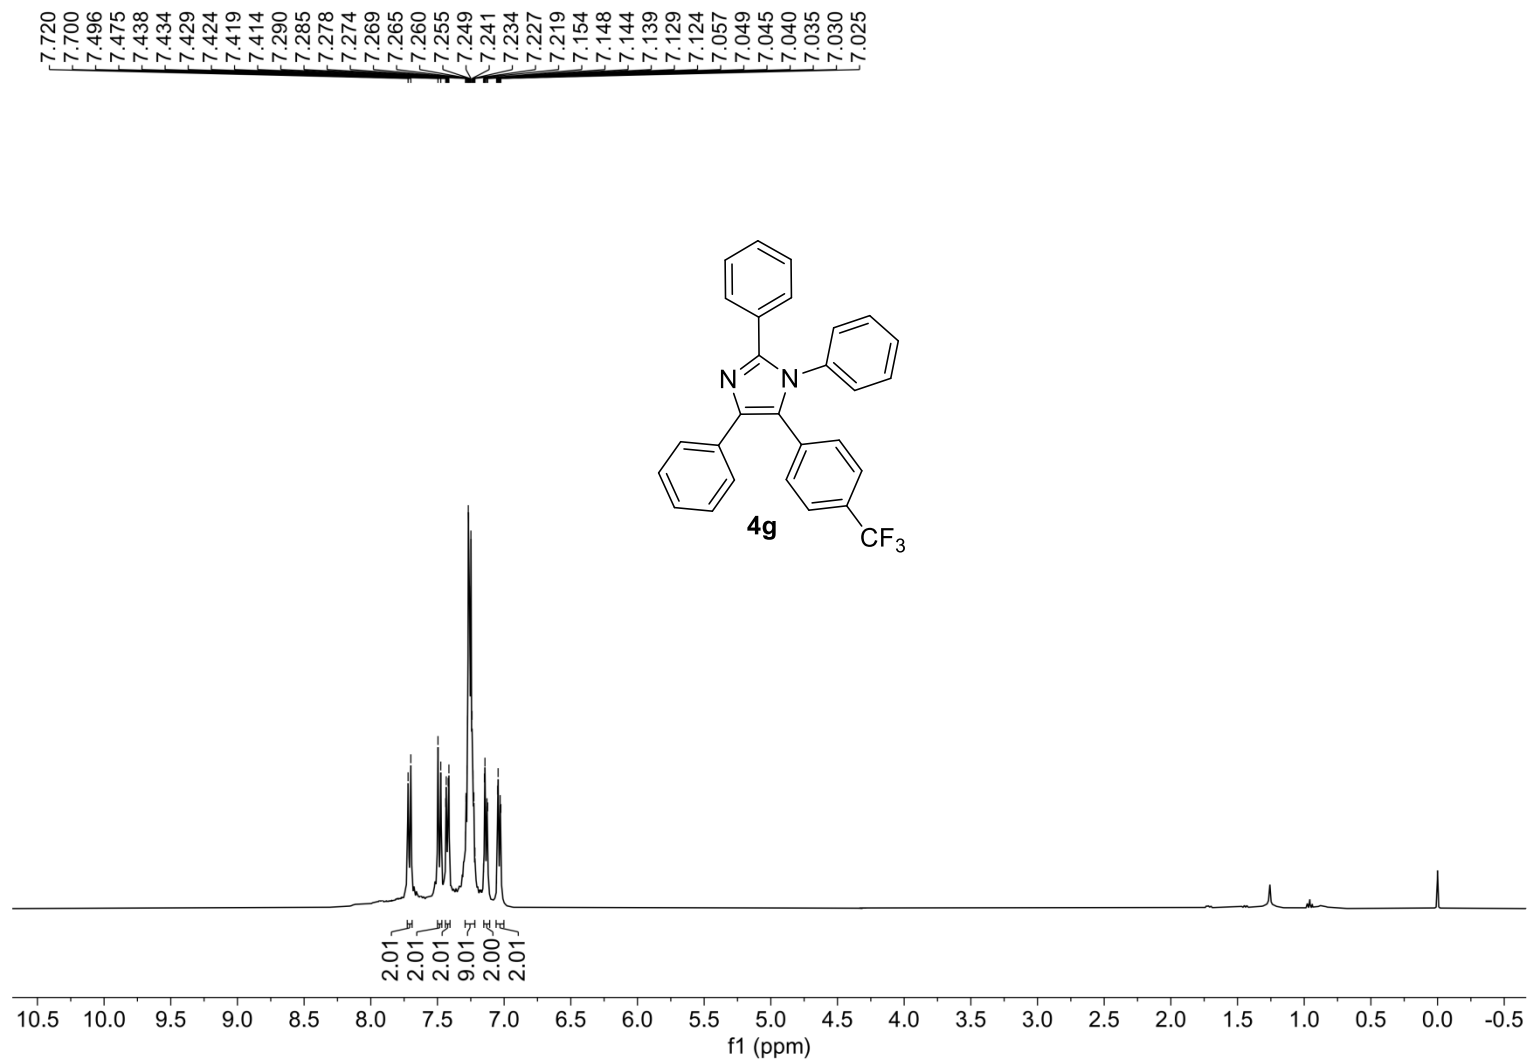

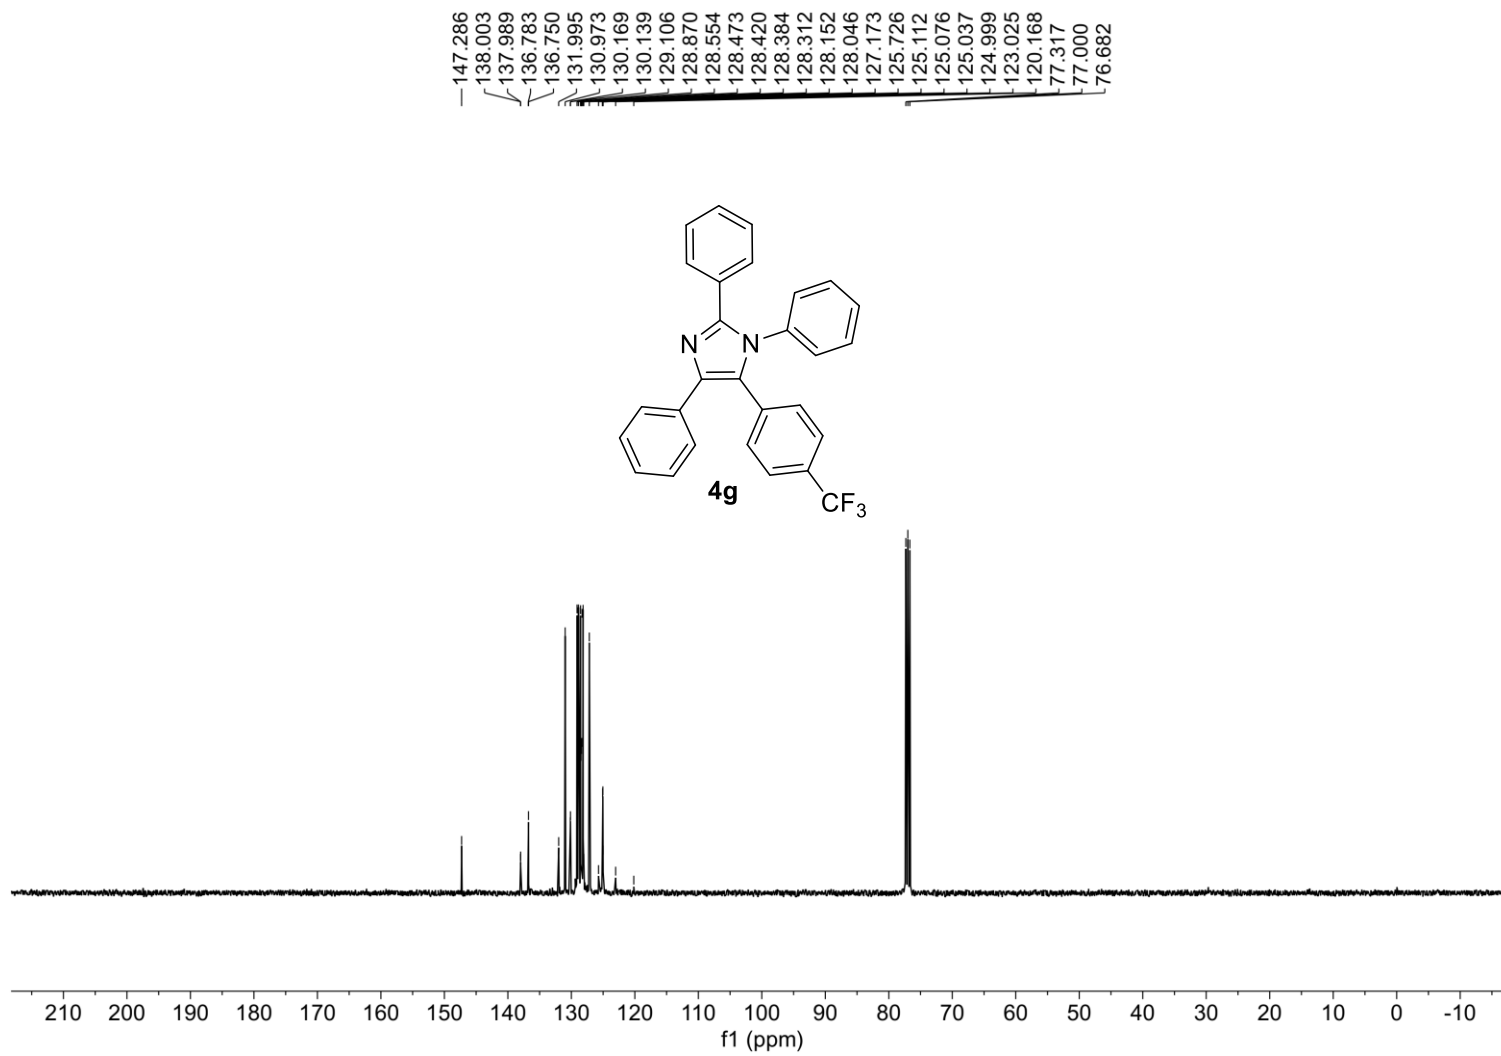



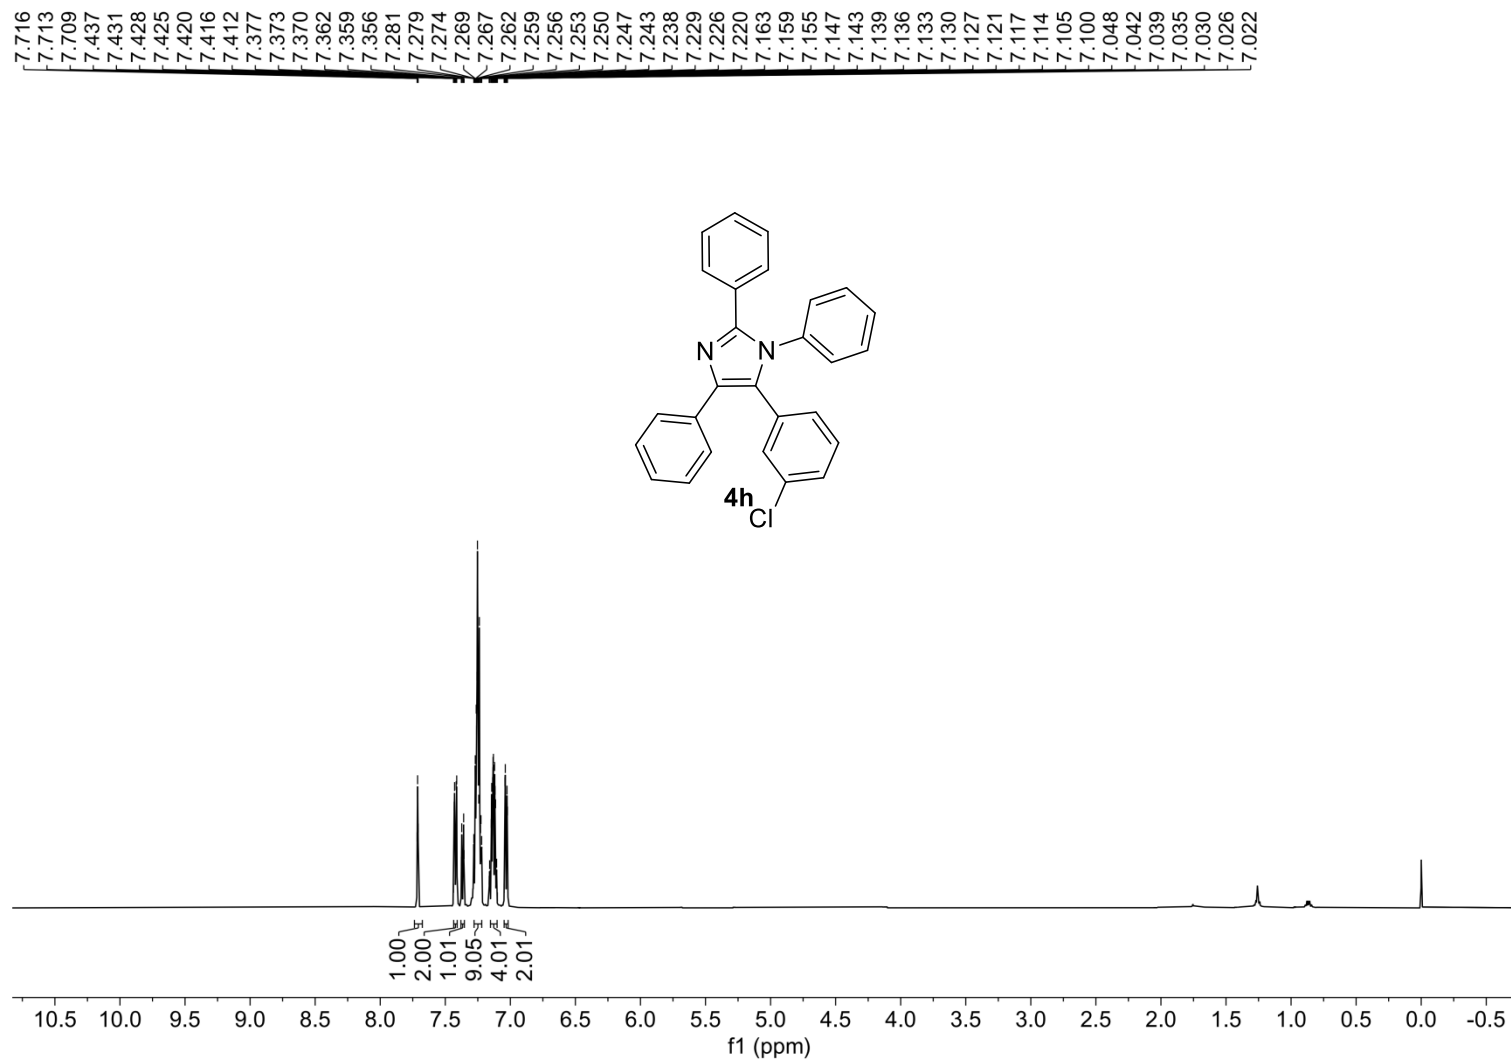

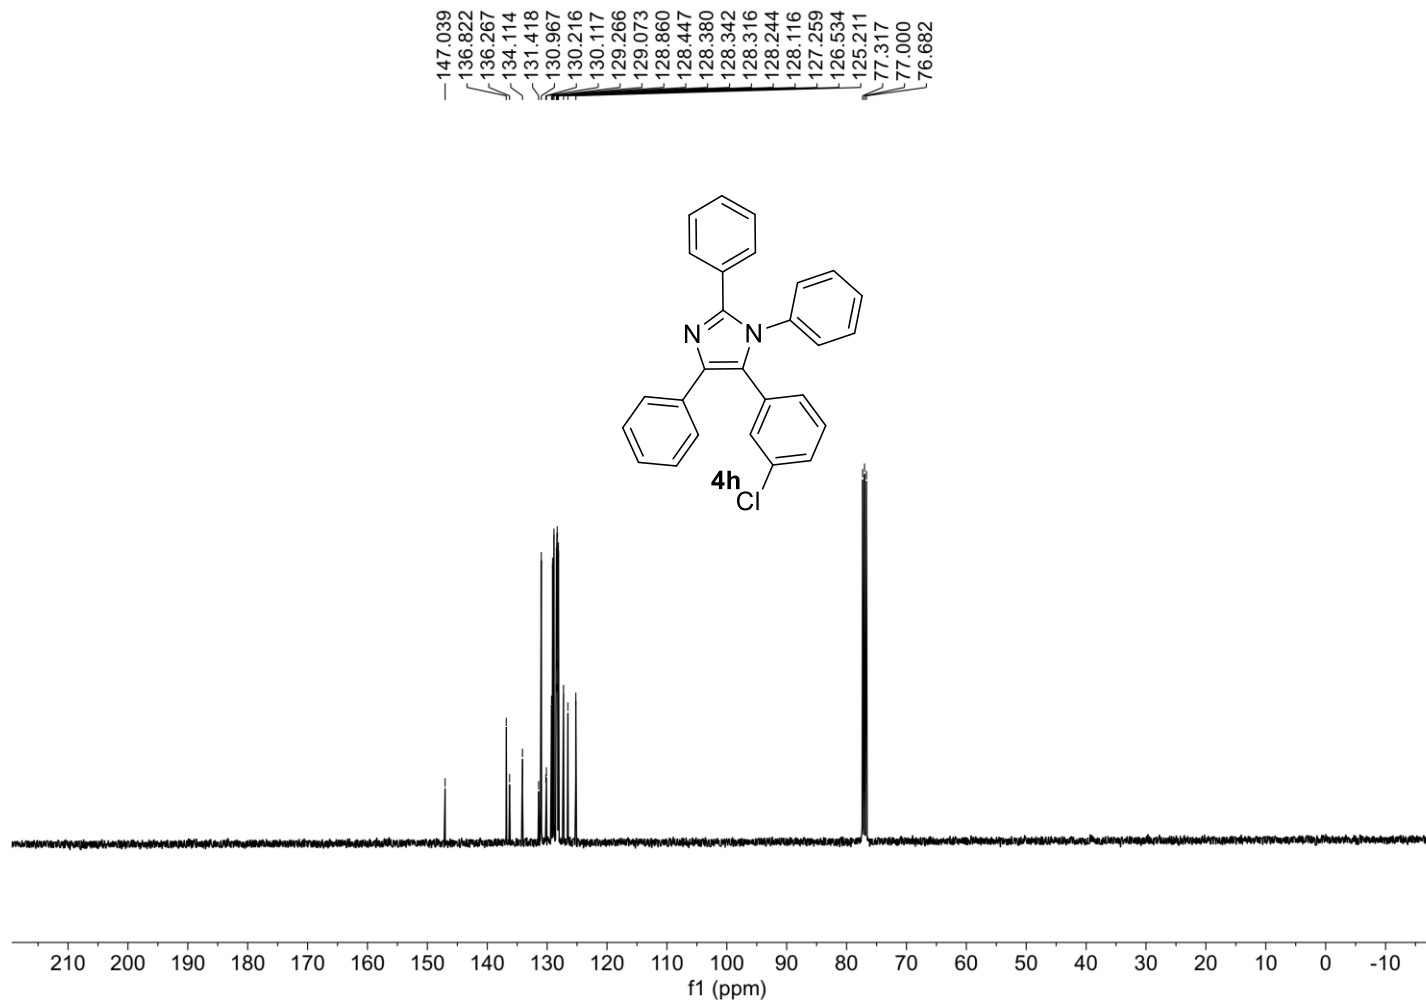

7.555  
7.548  
7.543  
7.538  
7.532  
7.420  
7.416  
7.412  
7.406  
7.401  
7.396  
7.345  
7.340  
7.335  
7.328  
7.322  
7.317  
7.312  
7.305  
7.294  
7.291  
7.286  
7.277  
7.249  
7.239  
7.232  
7.226  
7.216  
7.213  
7.208  
7.202  
7.198  
7.191  
7.184  
7.123  
7.116  
7.112  
7.106  
7.101  
7.096  
7.091  
7.082  
7.076  
7.064  
7.060  
7.055  
6.915  
6.909  
6.905  
6.901  
6.894  
6.889  
6.885

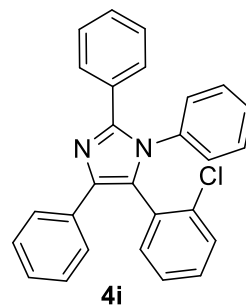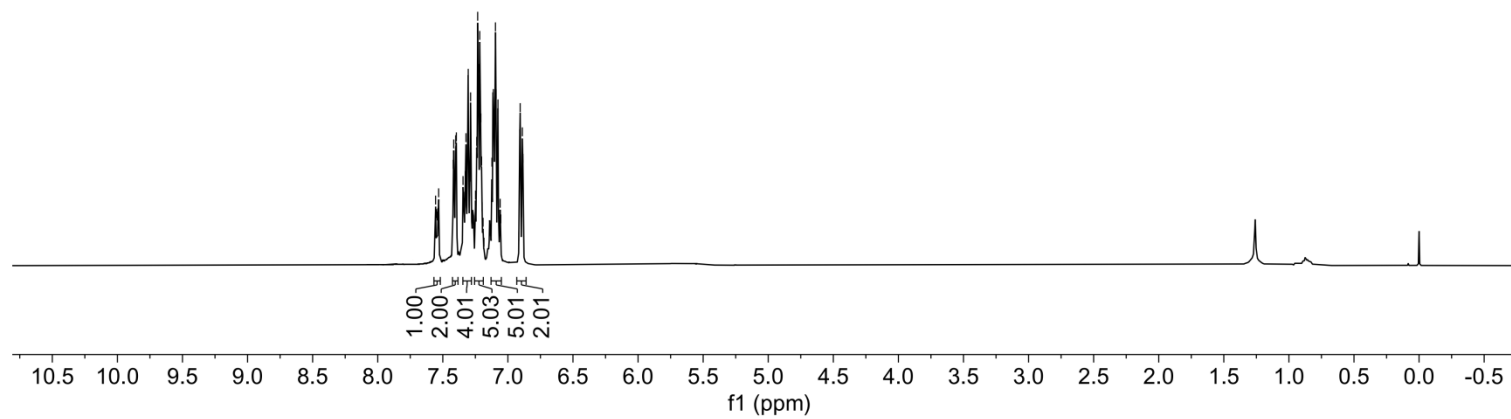

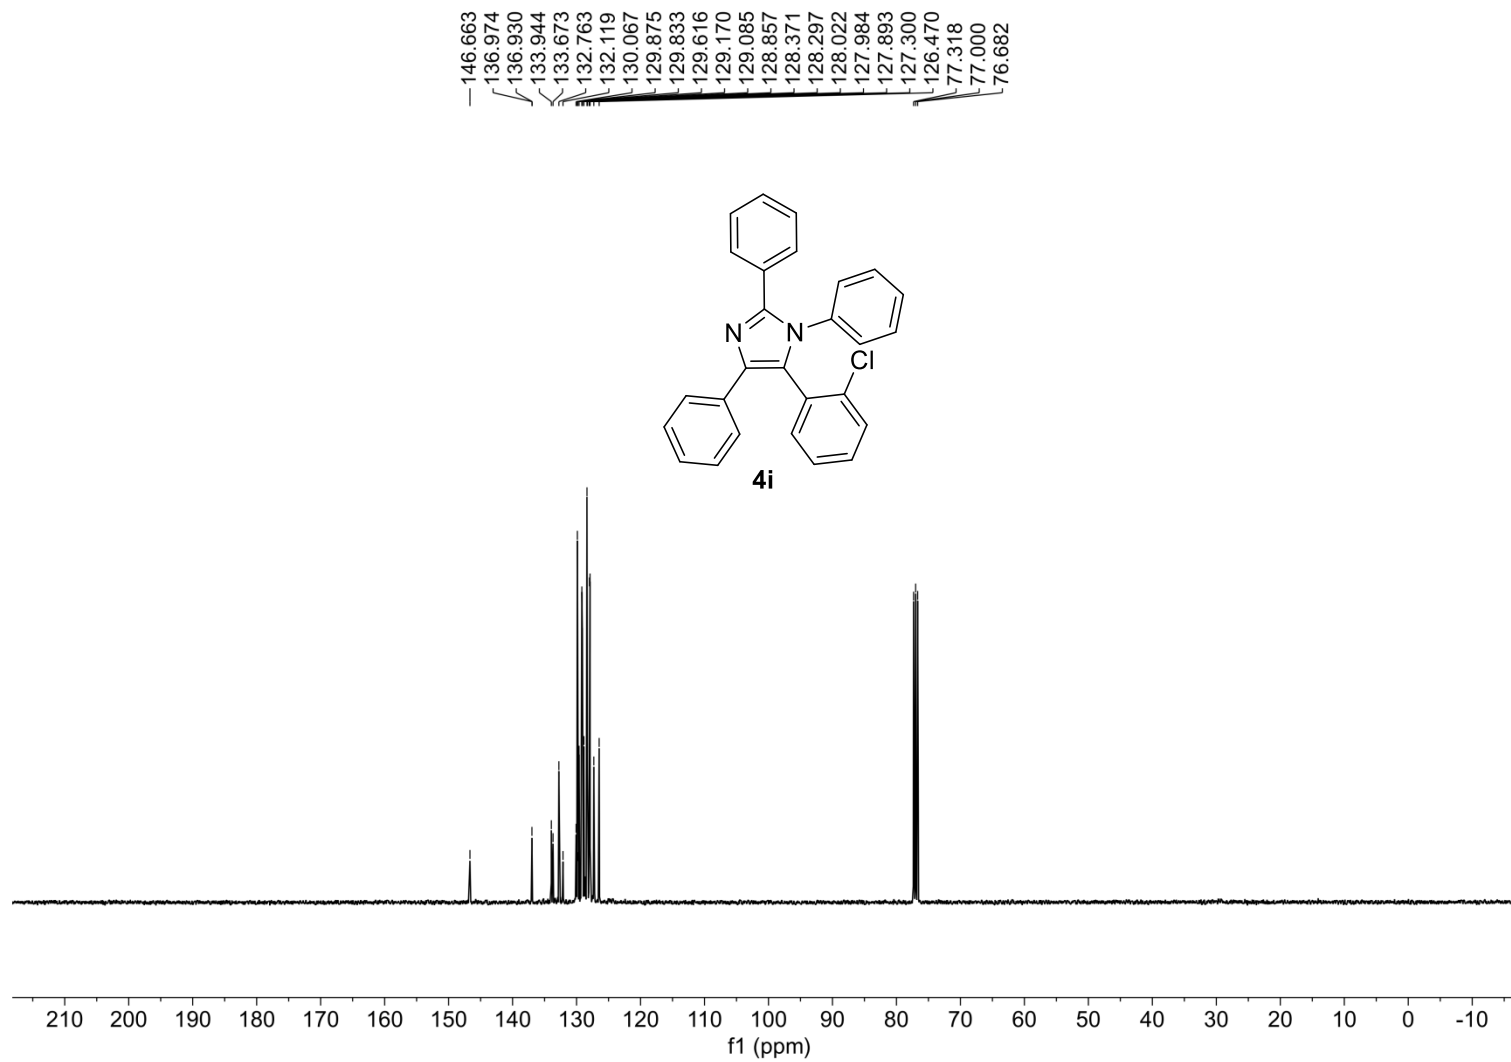

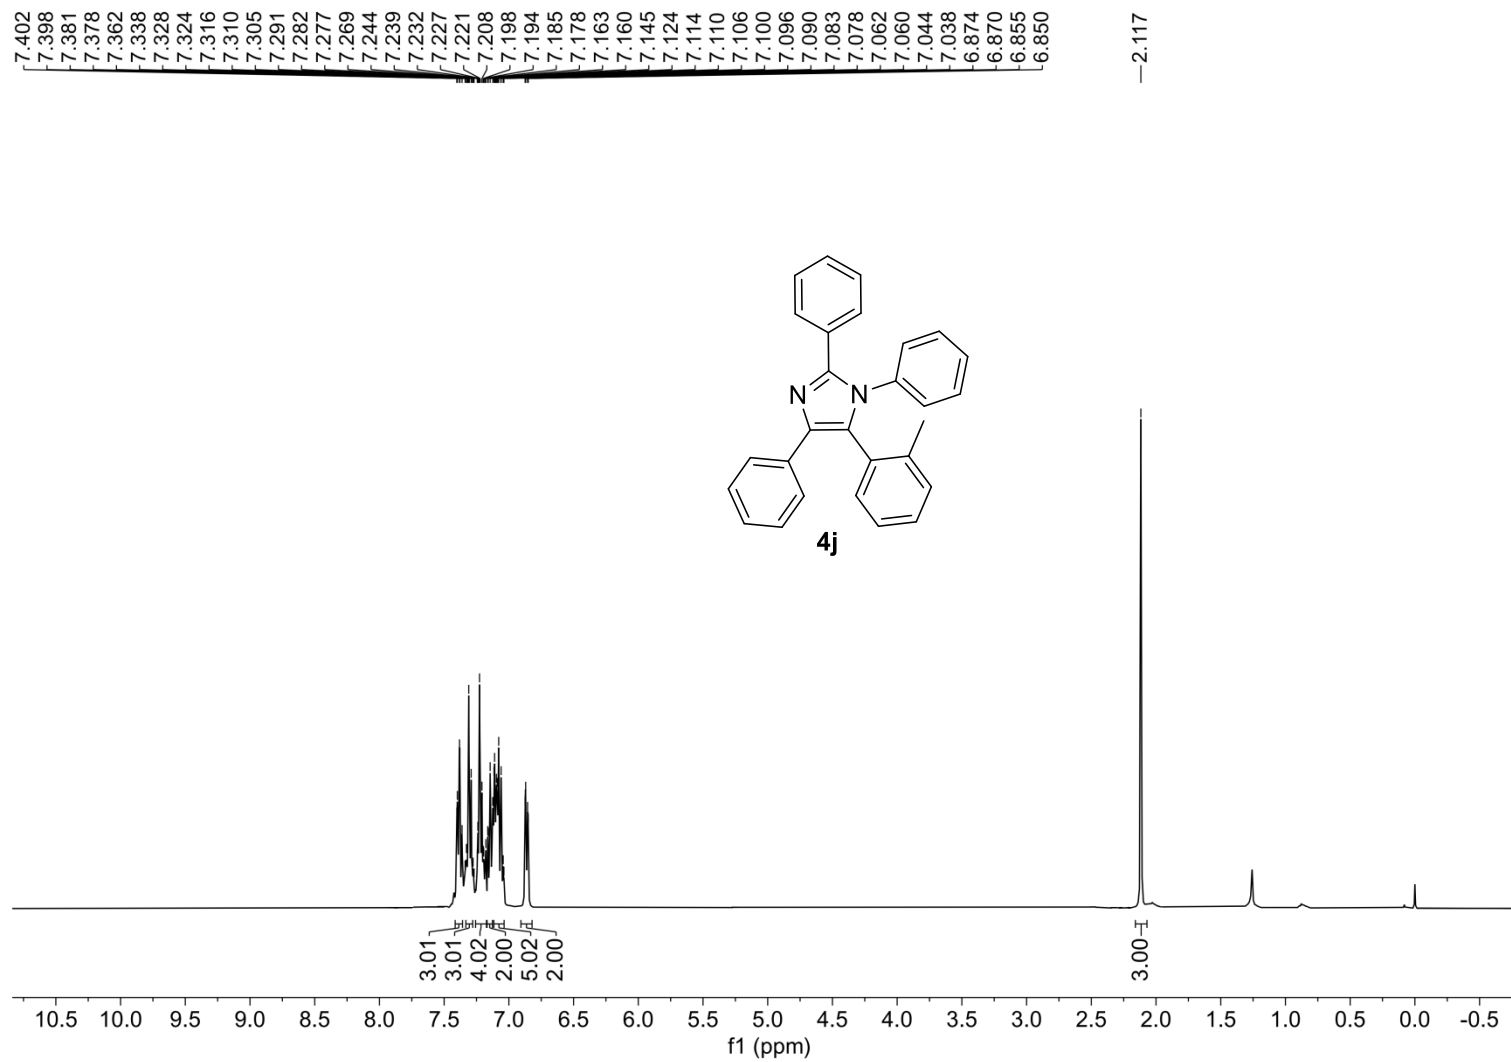

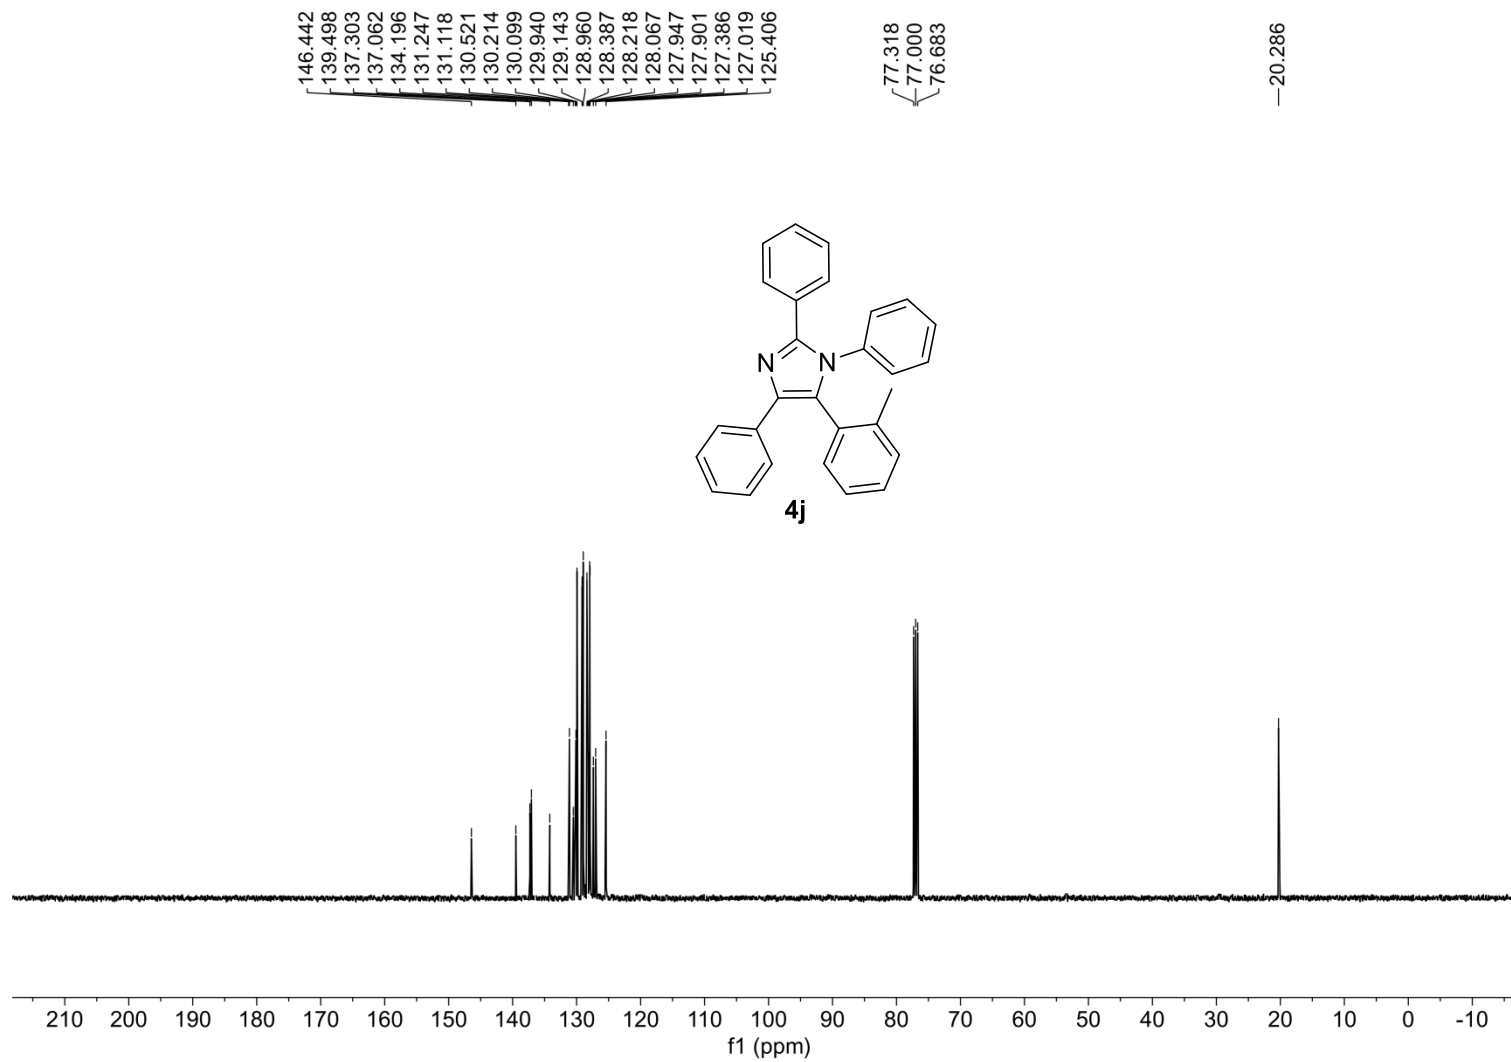

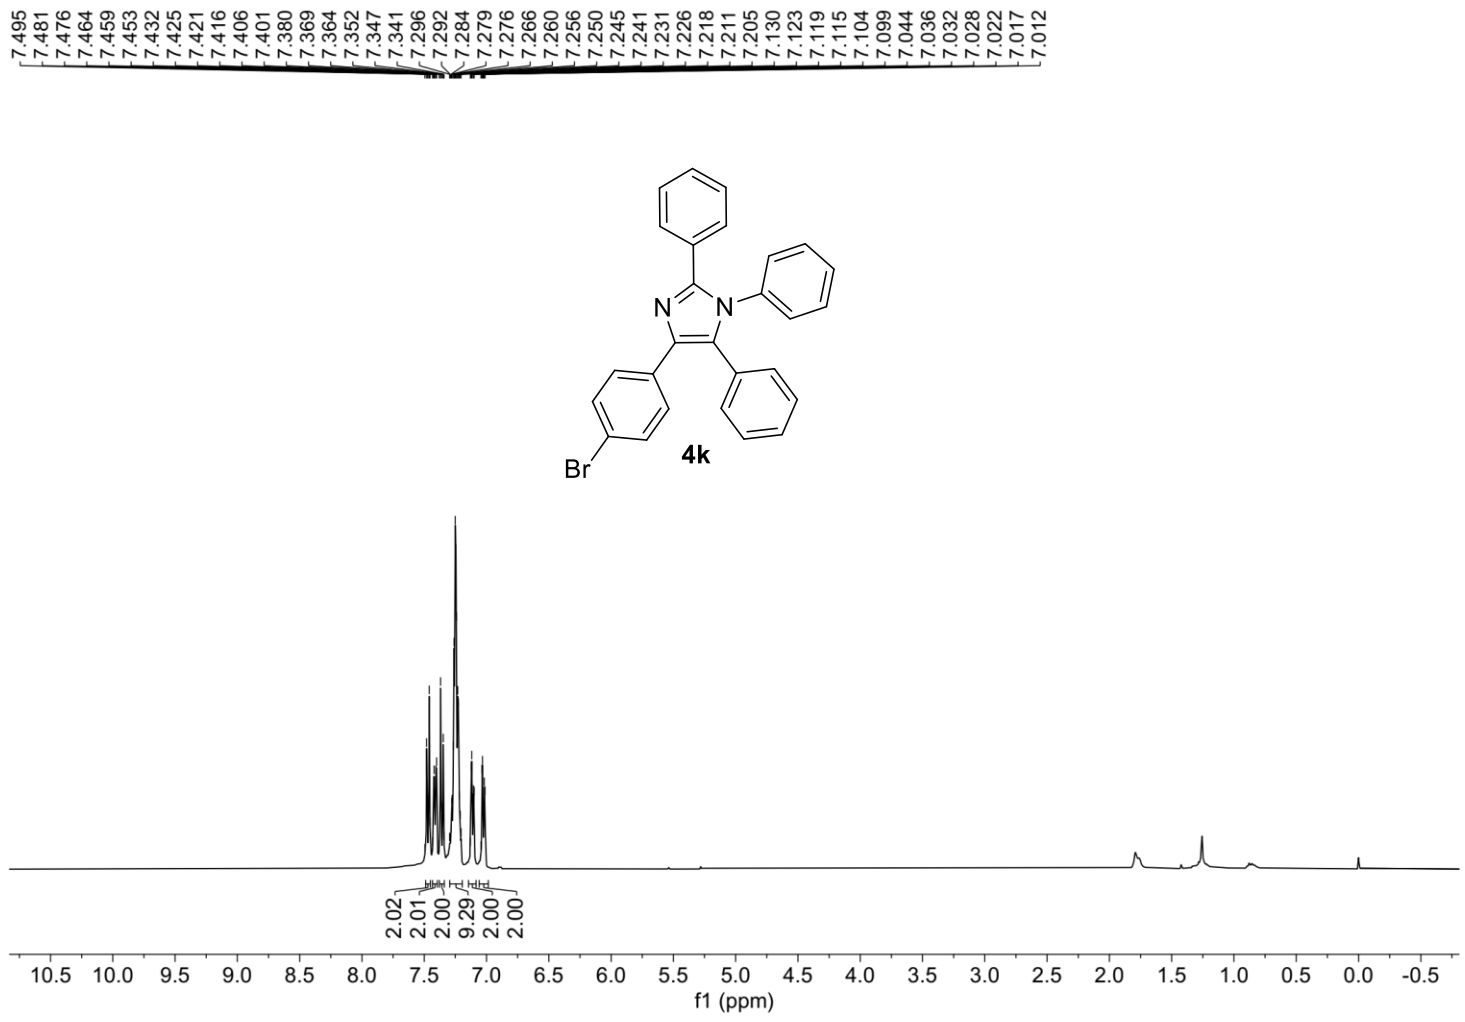

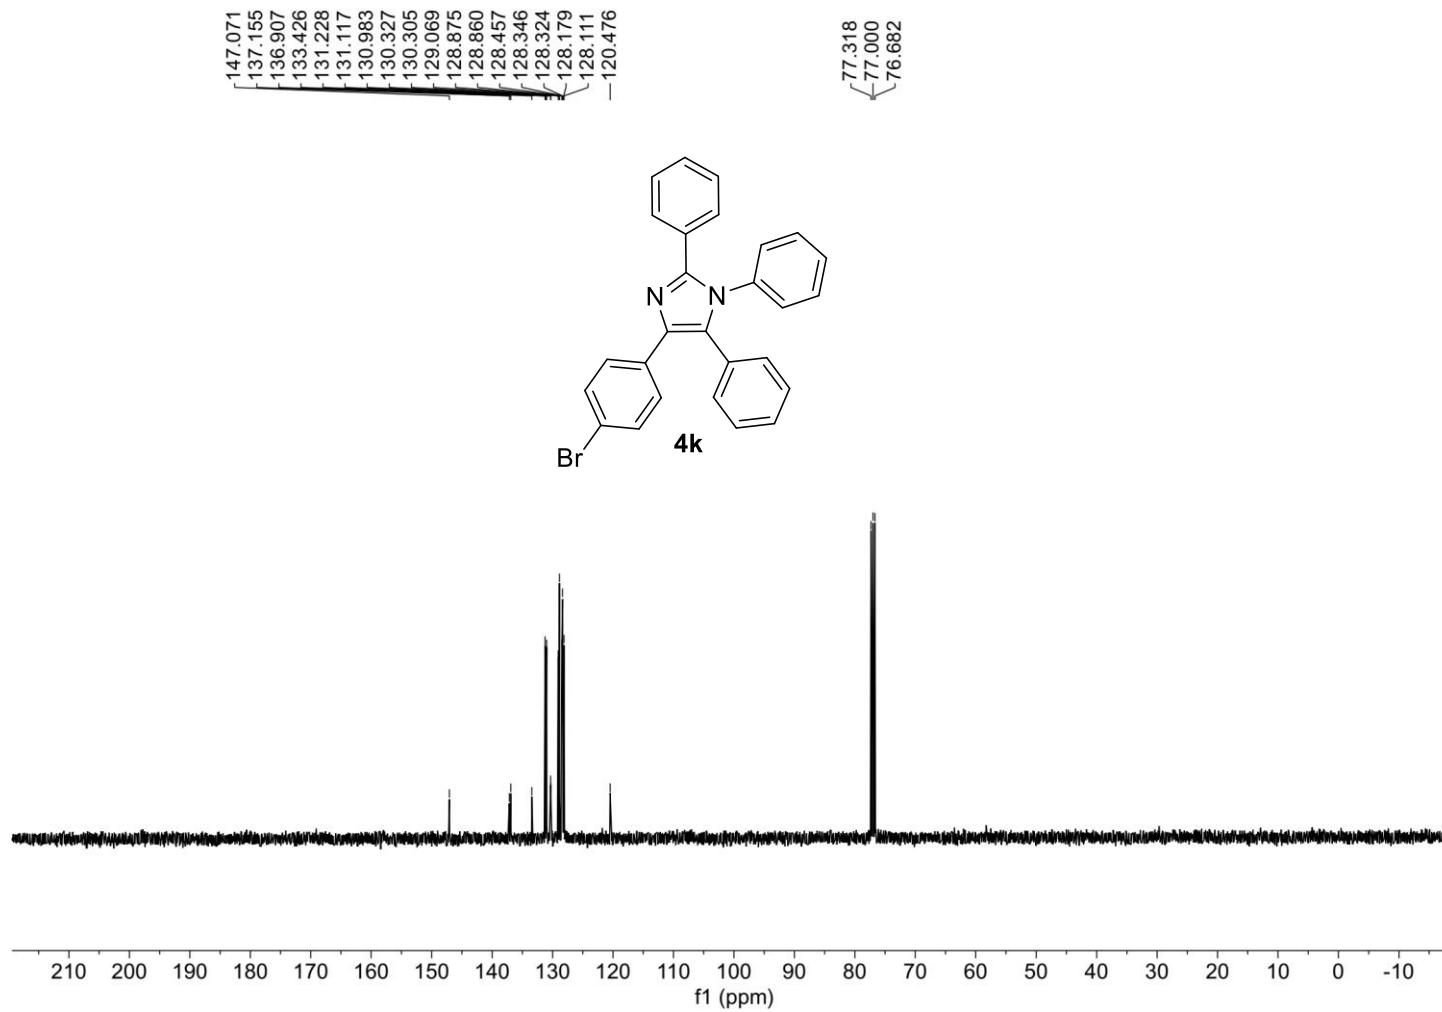



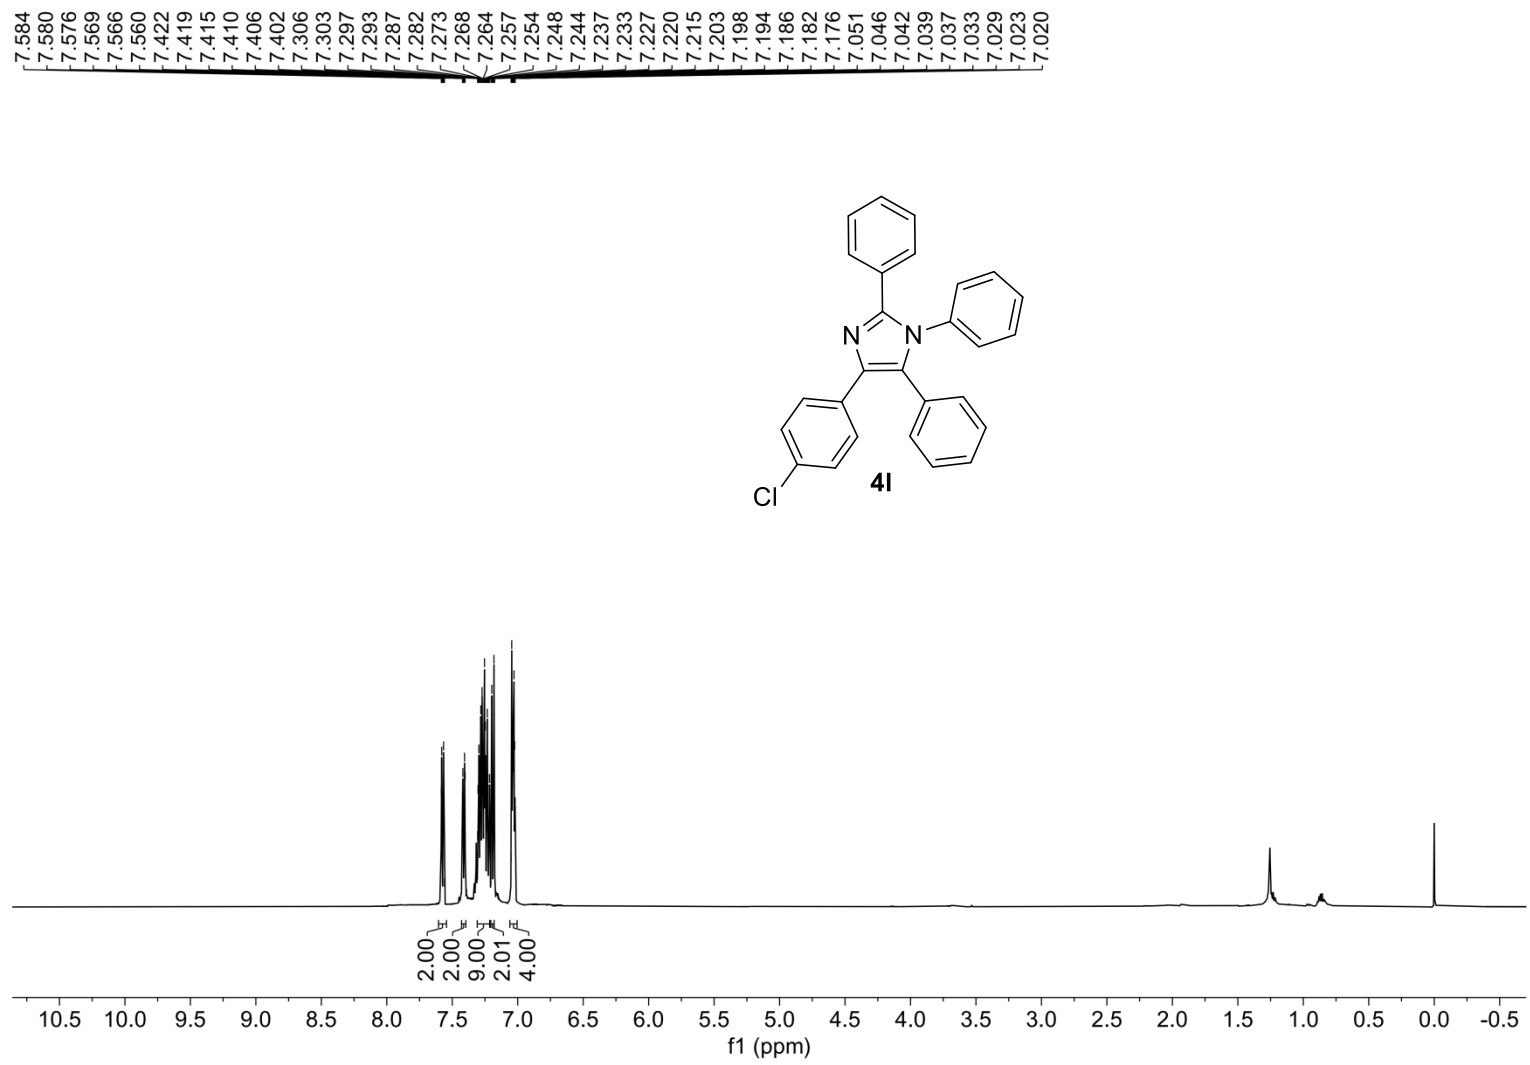

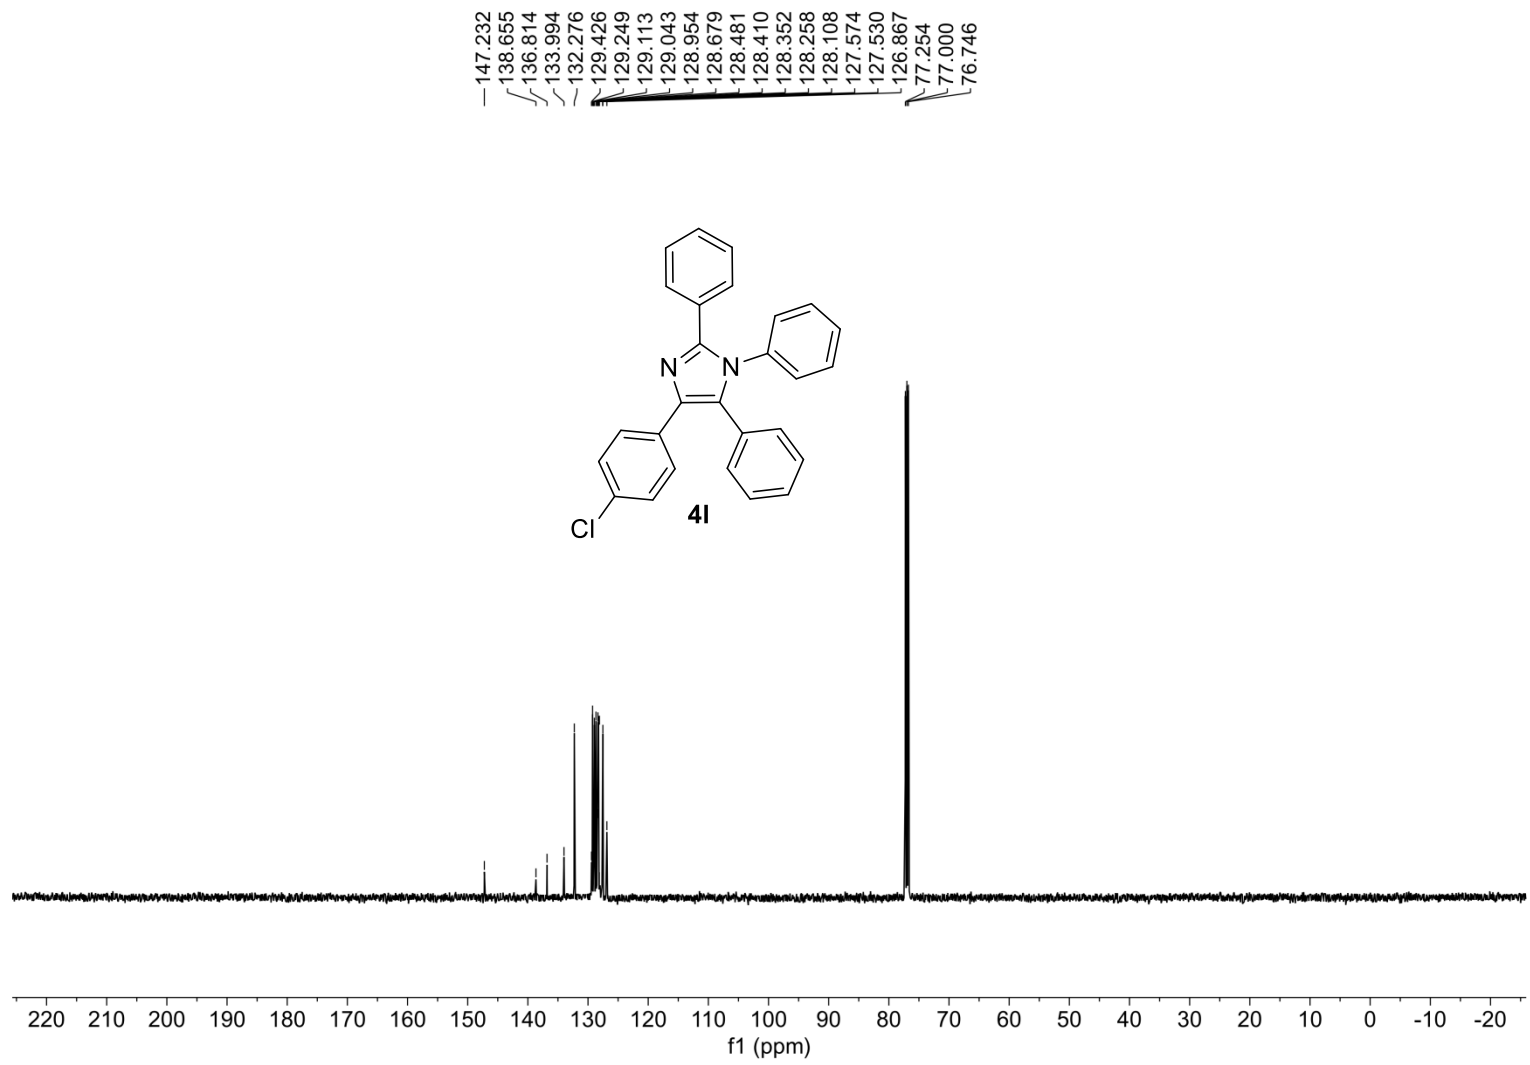

7.595  
7.590  
7.572  
7.430  
7.426  
7.411  
7.406  
7.328  
7.309  
7.294  
7.276  
7.271  
7.252  
7.246  
7.228  
7.204  
7.193  
7.159  
7.140  
7.120  
7.104  
7.099  
7.058  
7.045  
7.031  
7.026  
7.014  
6.995

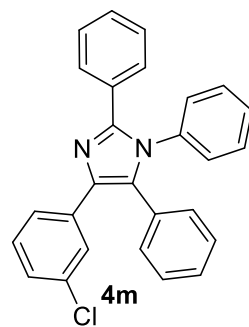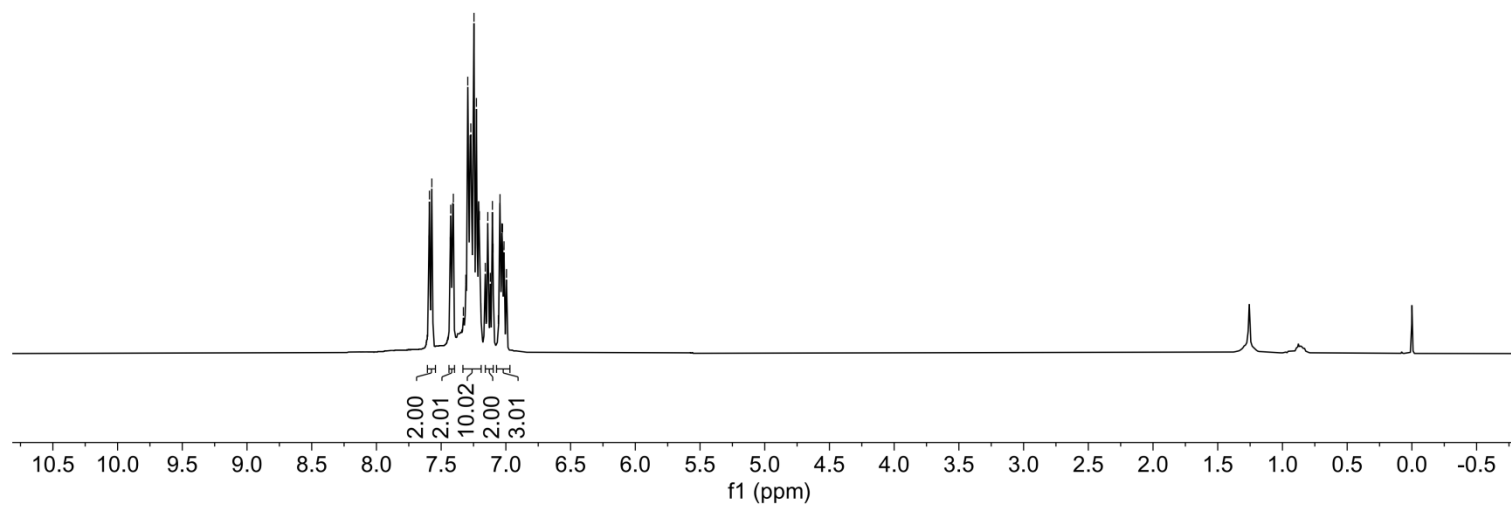

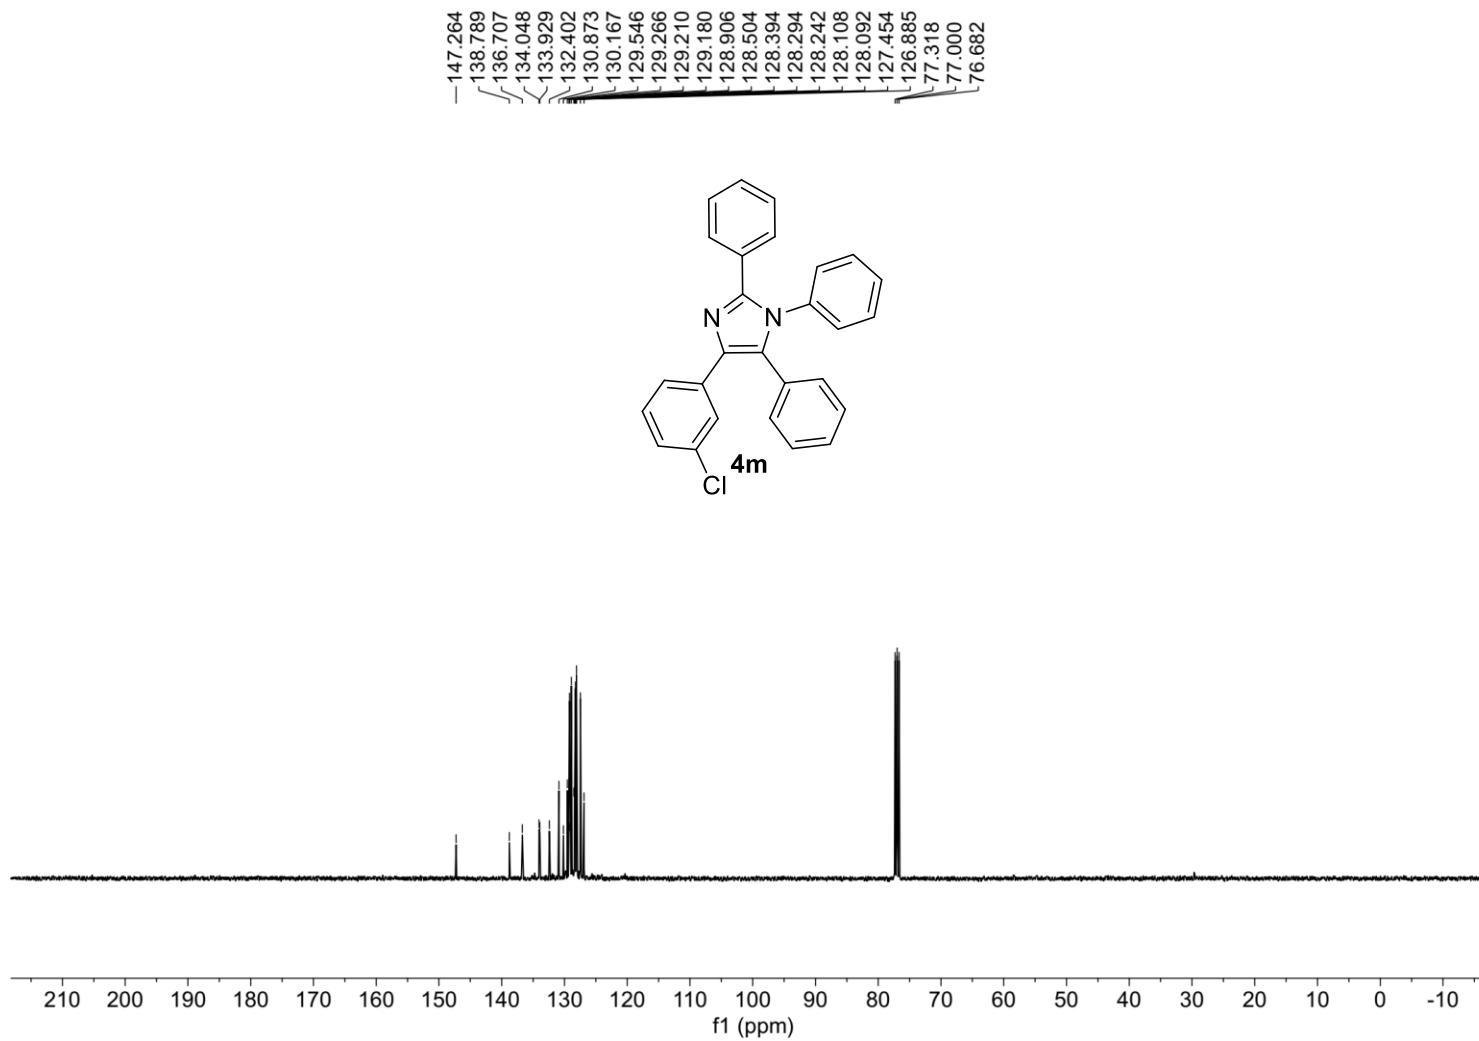

7.509  
7.490  
7.412  
7.392  
7.226  
7.222  
7.208  
7.192  
7.057  
7.038  
7.020  
6.992

2.287  
2.269

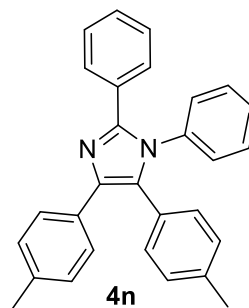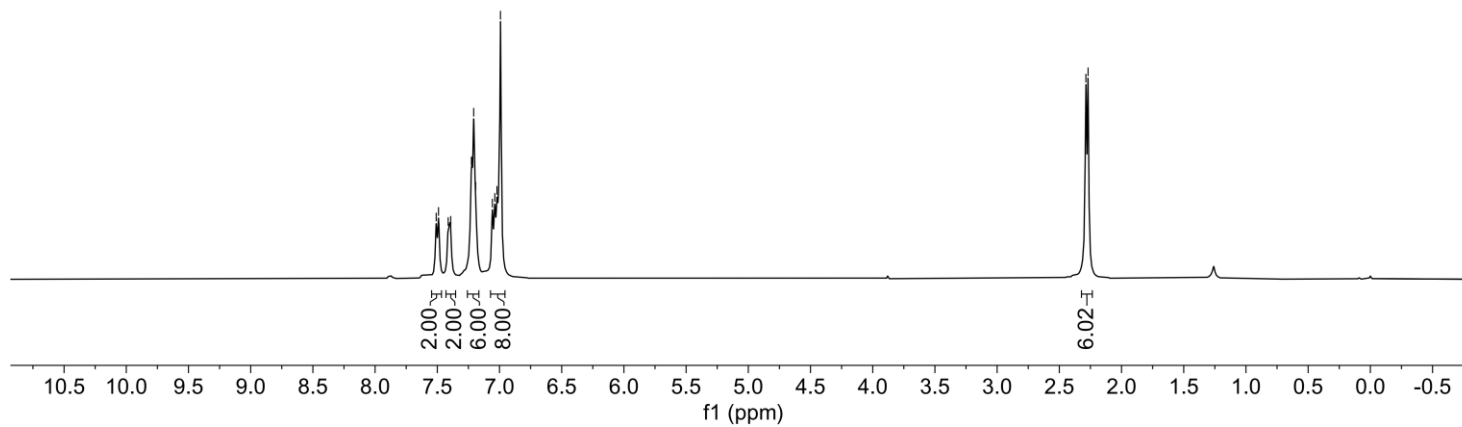

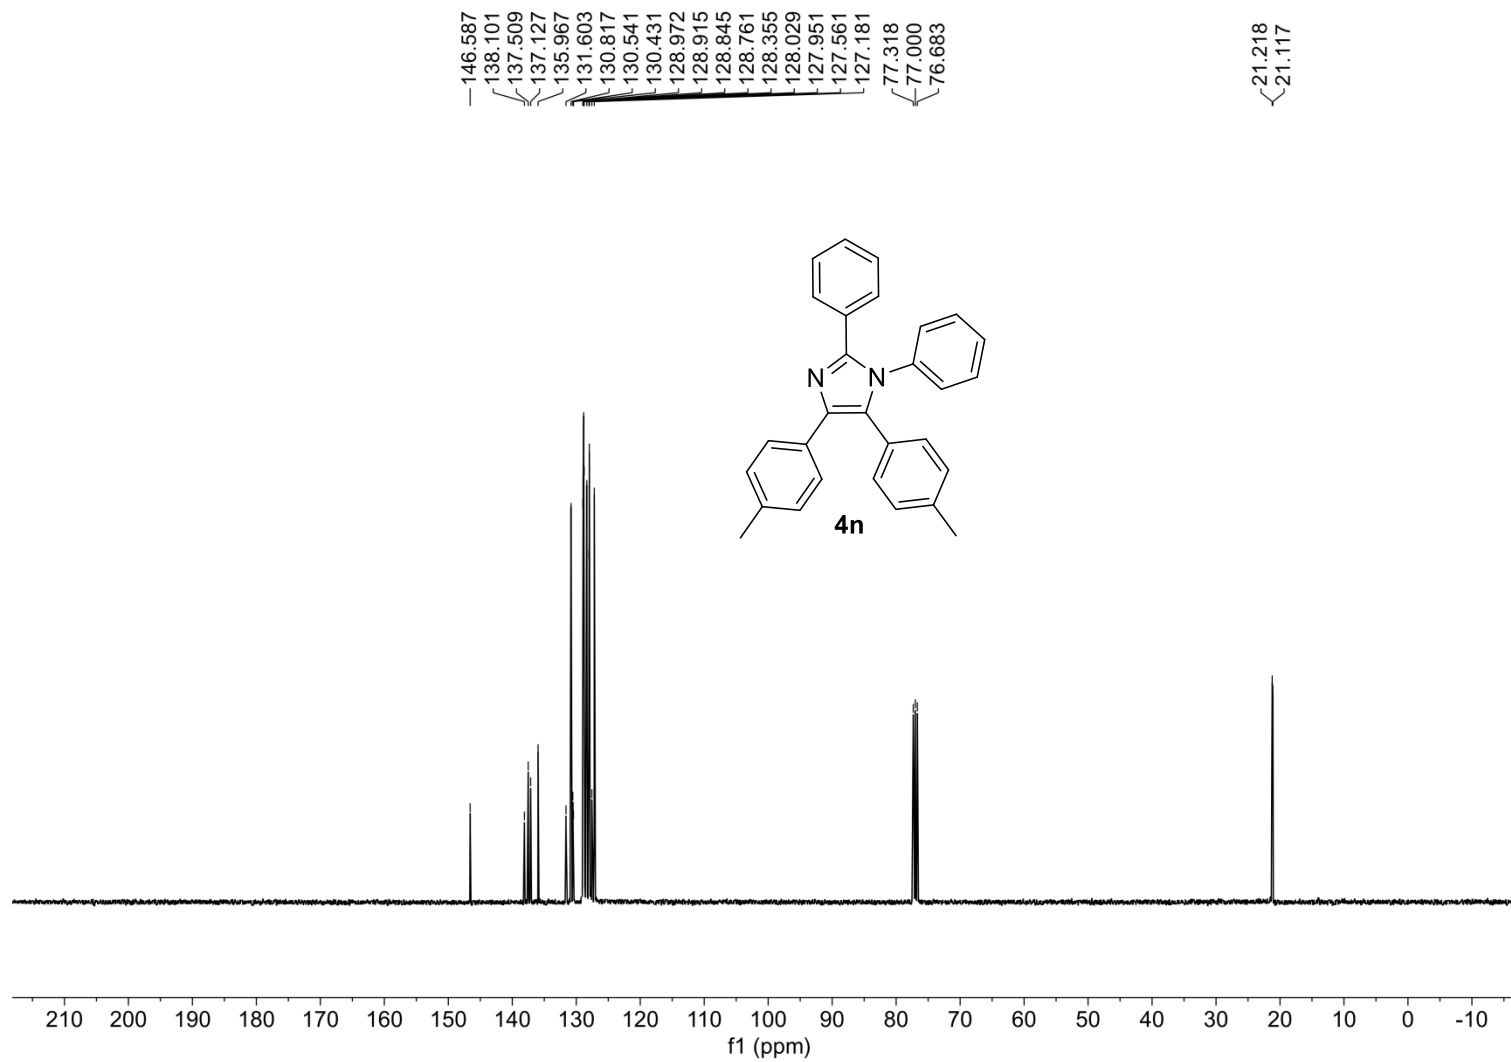

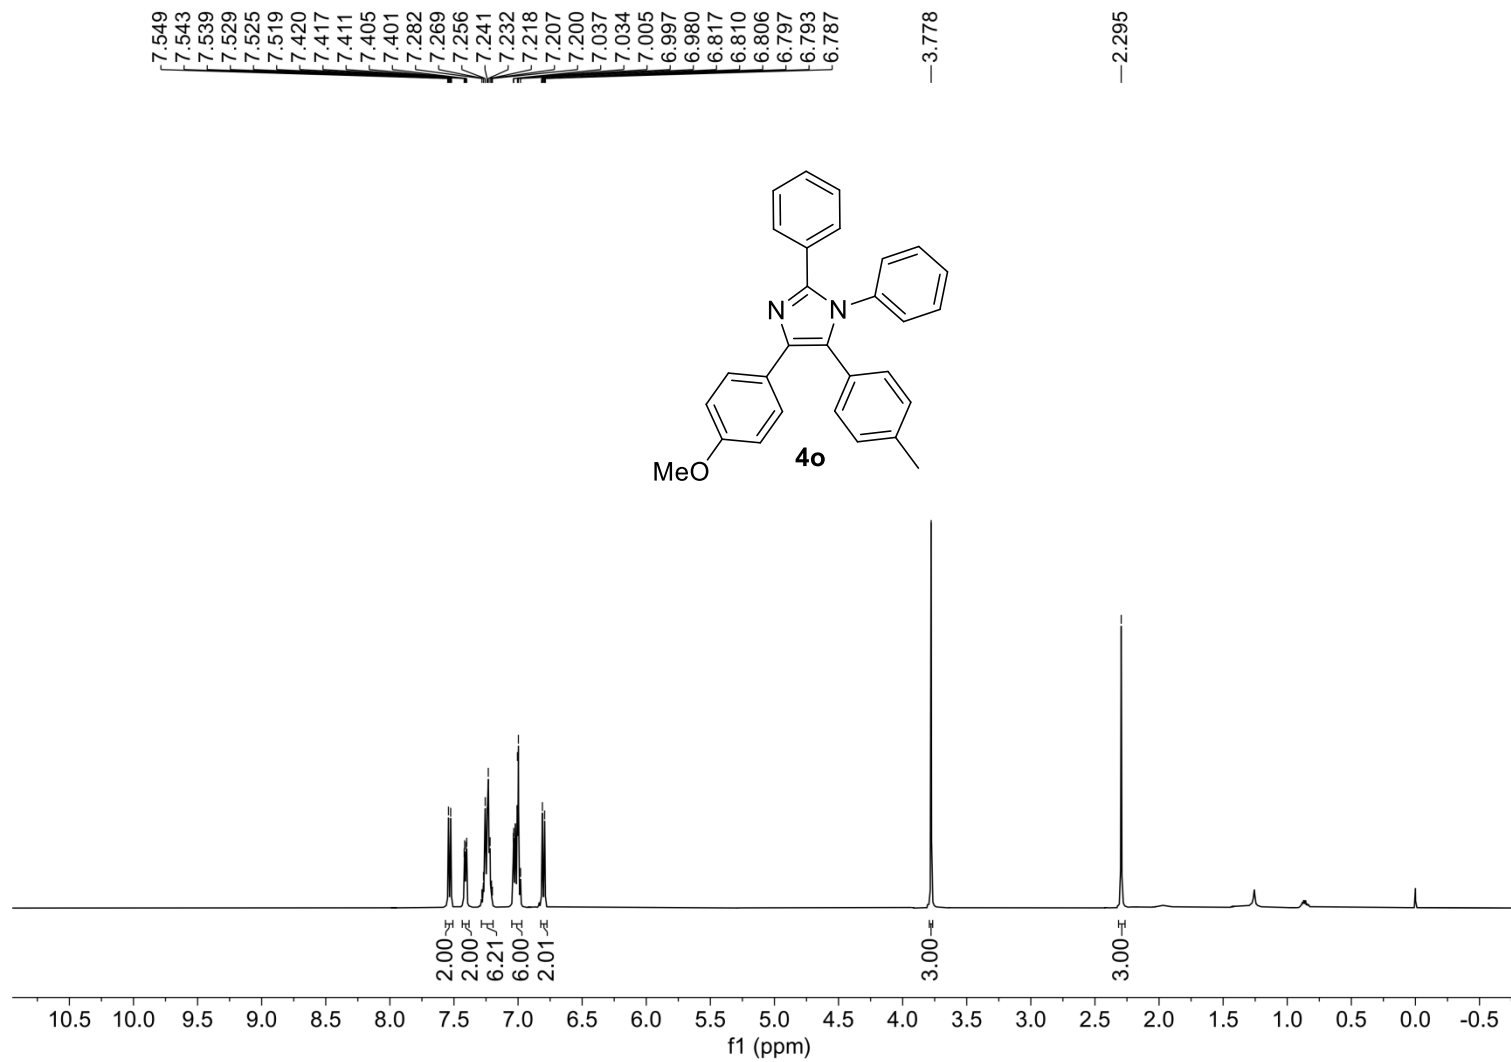

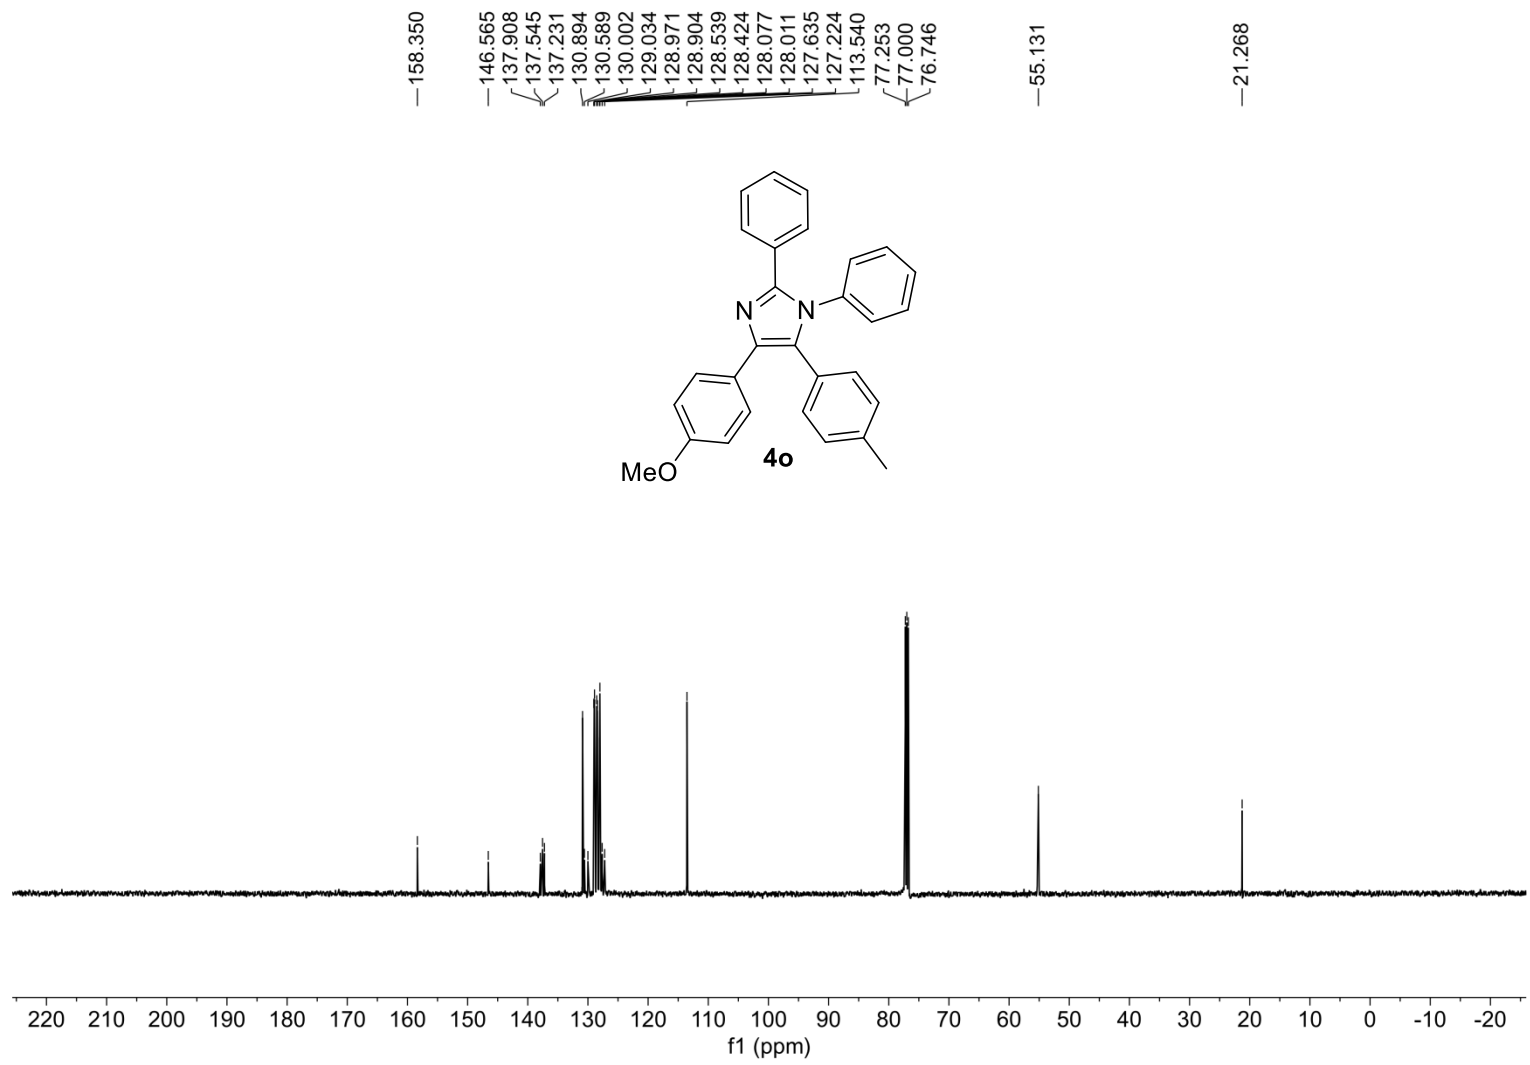



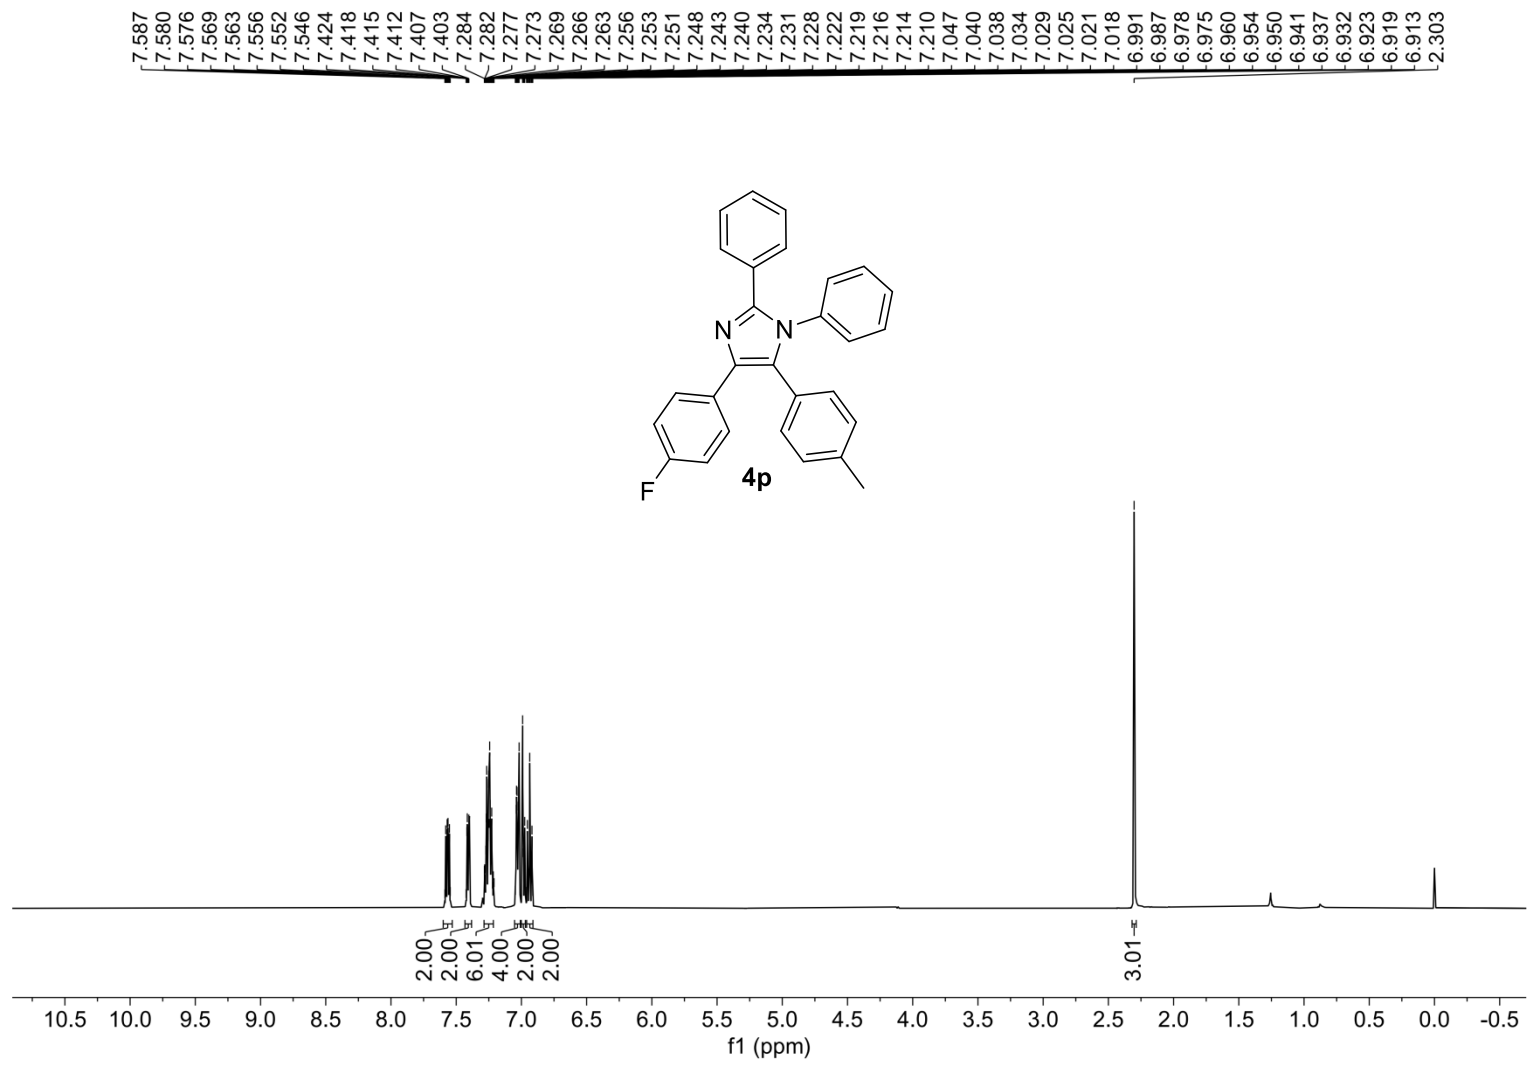

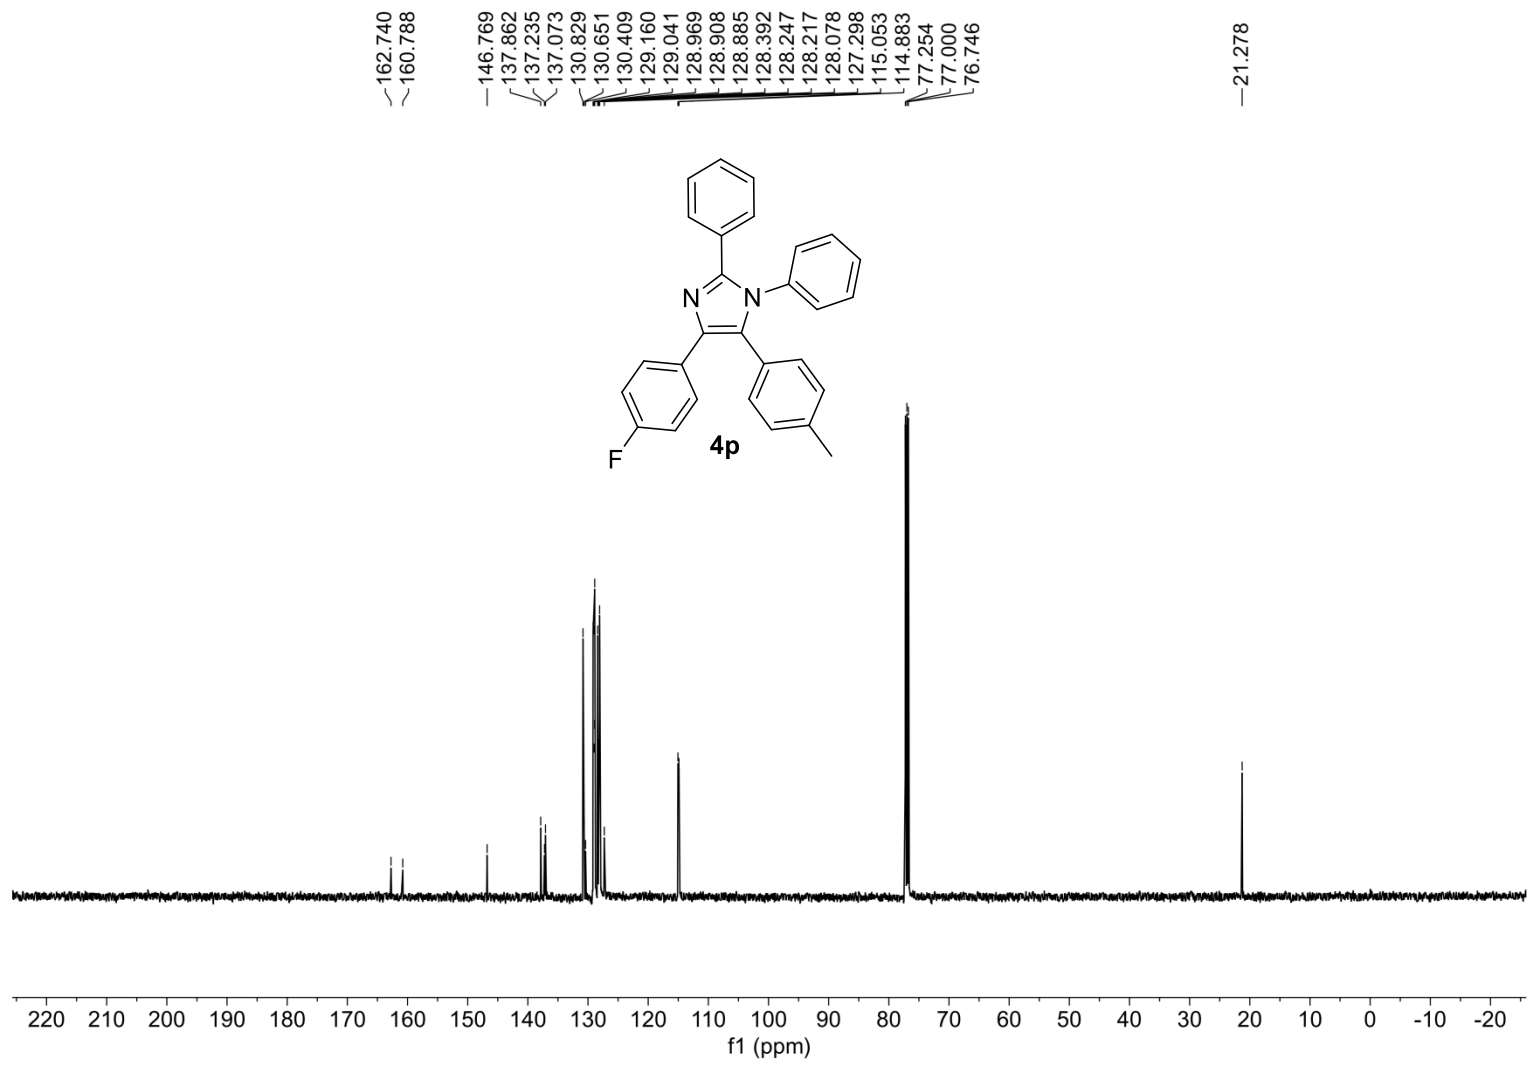

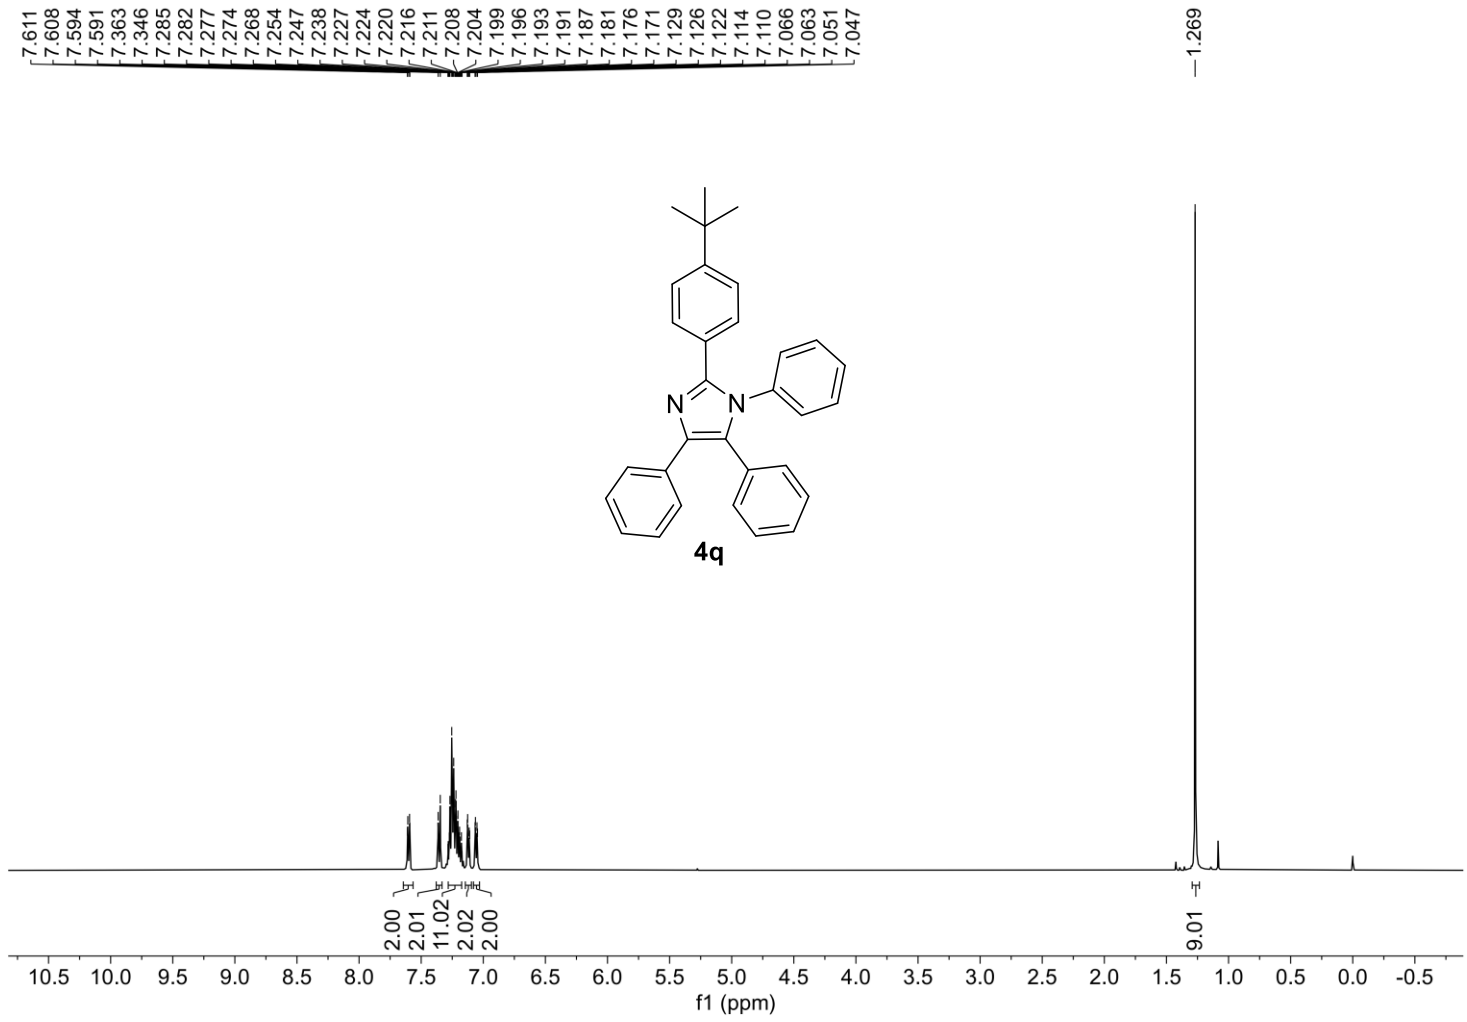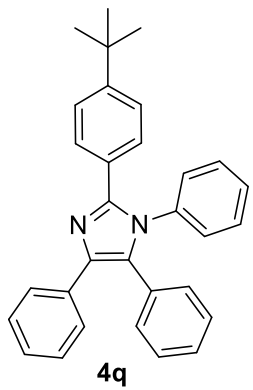

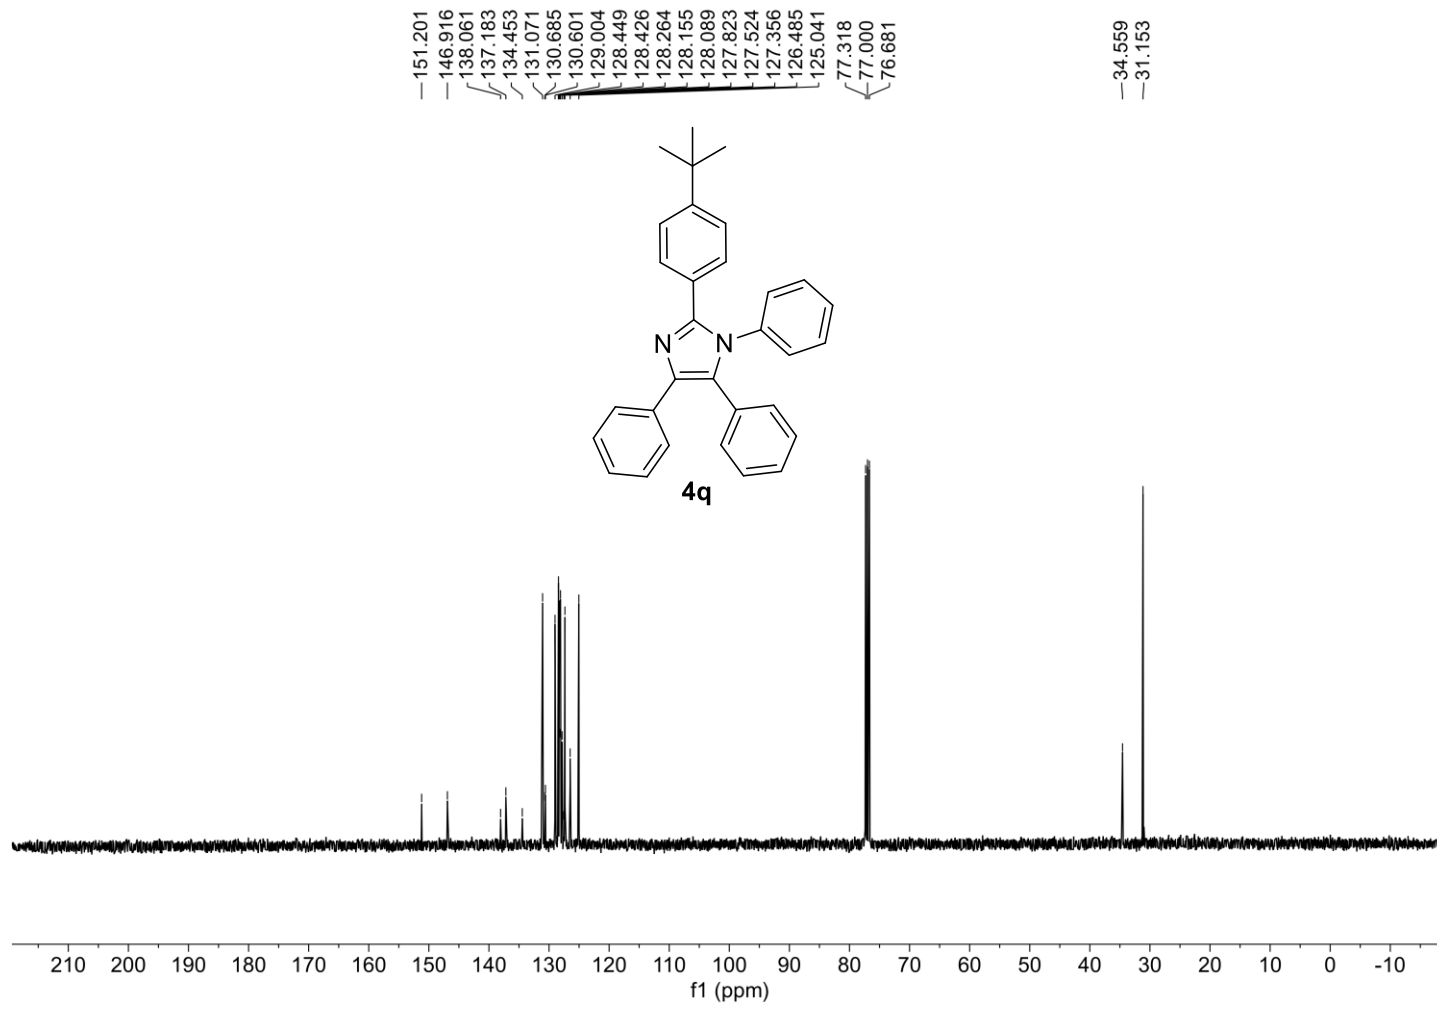

7.597  
7.579  
7.470  
7.448  
7.328  
7.323  
7.309  
7.292  
7.288  
7.273  
7.262  
7.251  
7.246  
7.235  
7.231  
7.216  
7.208  
7.199  
7.192  
7.184  
7.173  
7.135  
7.131  
7.116  
7.111  
7.092  
7.070  
7.055  
7.052  
7.037  
7.032

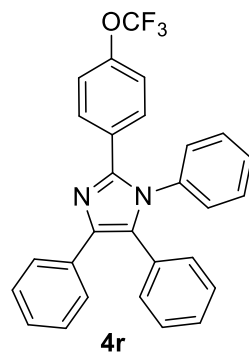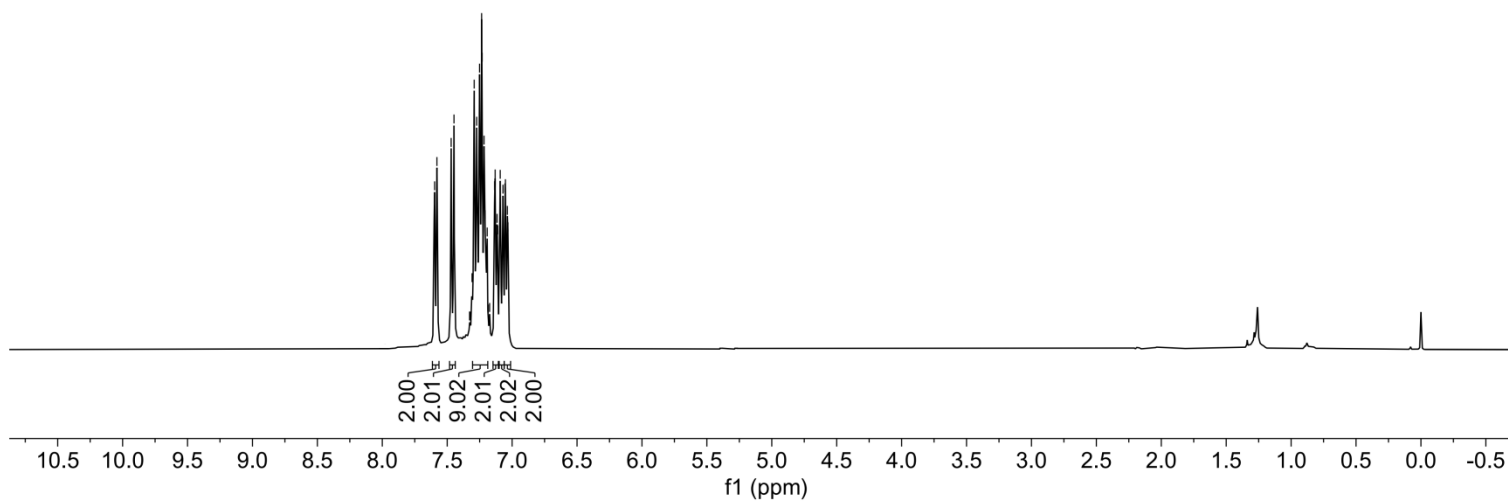

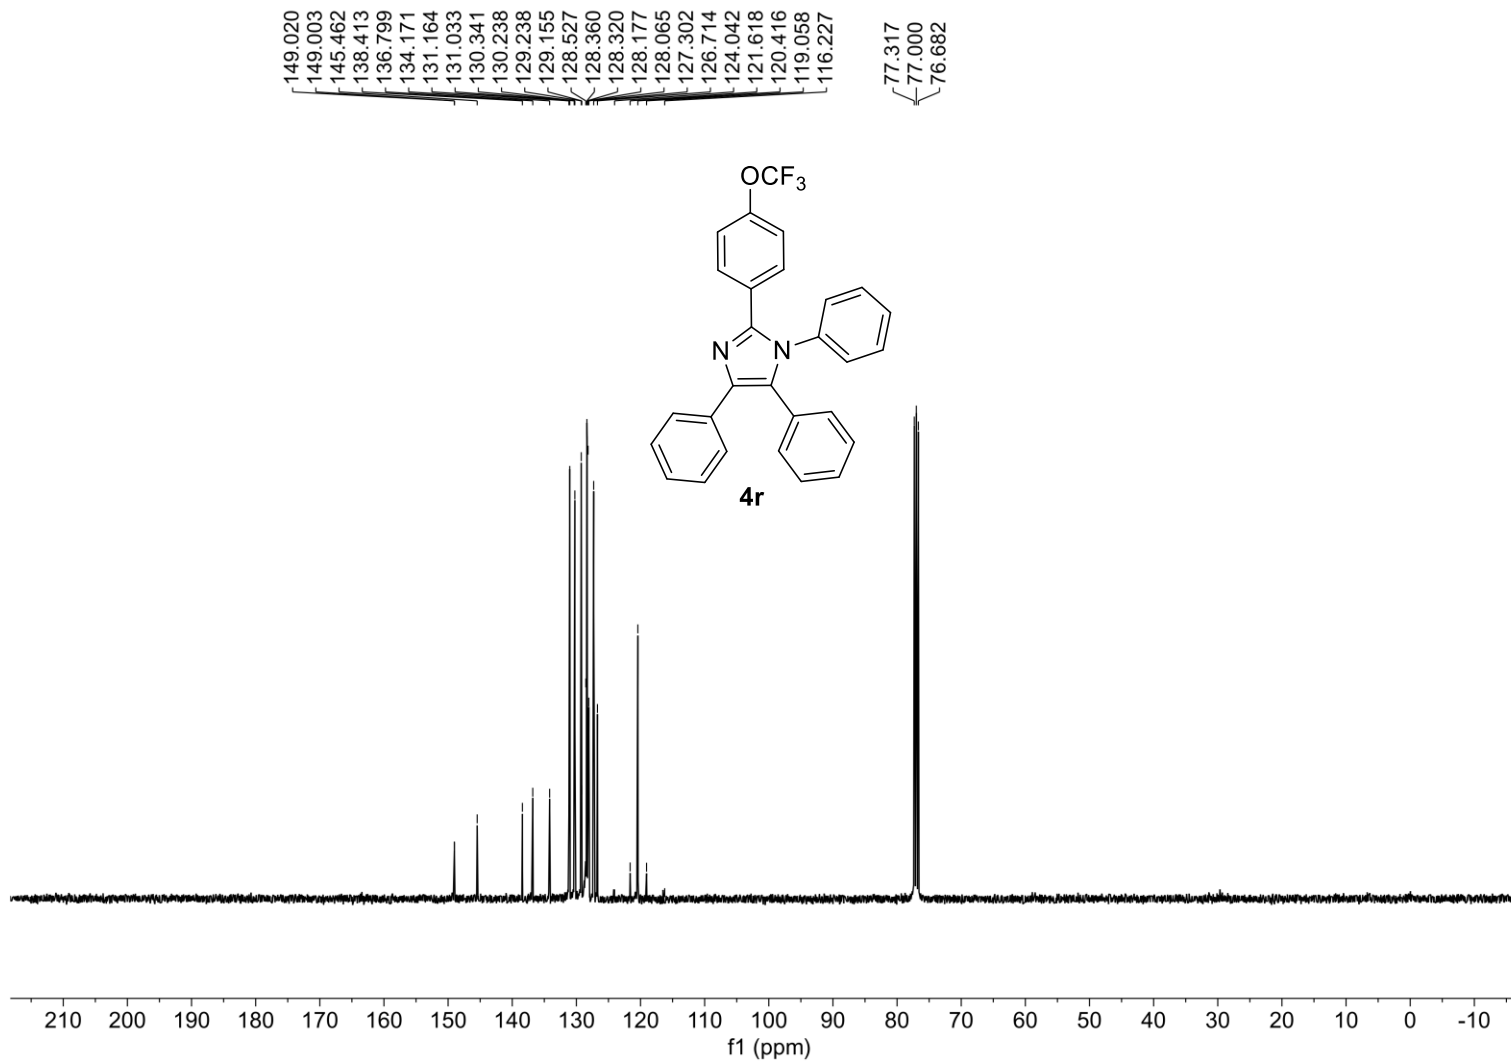

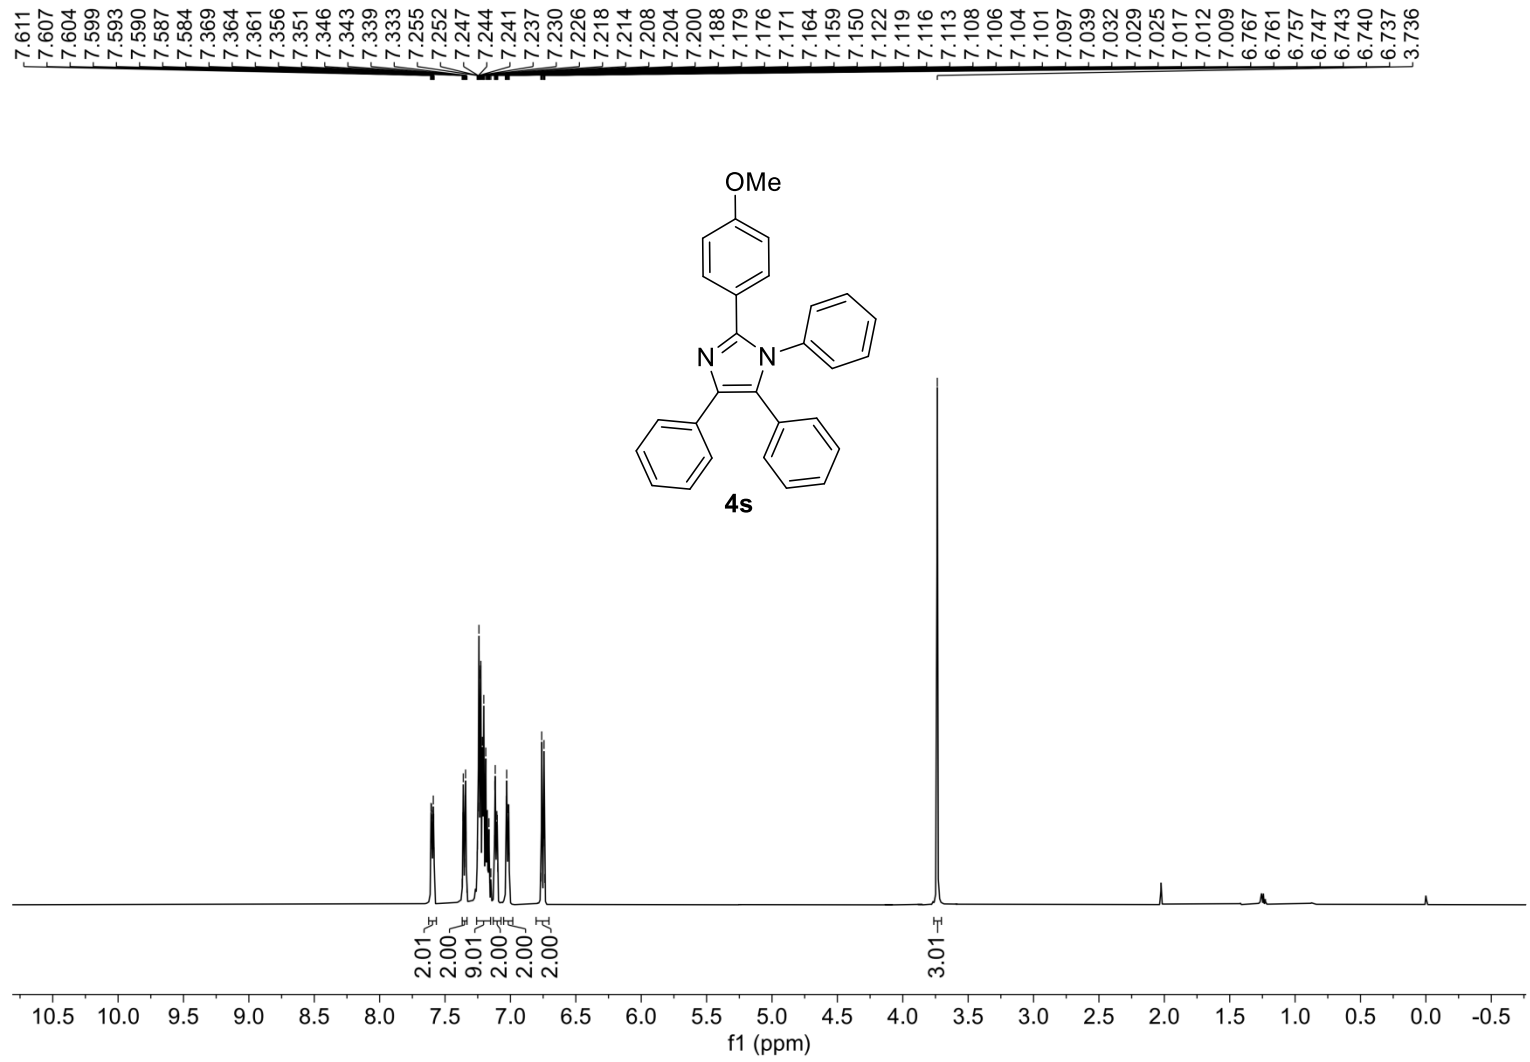

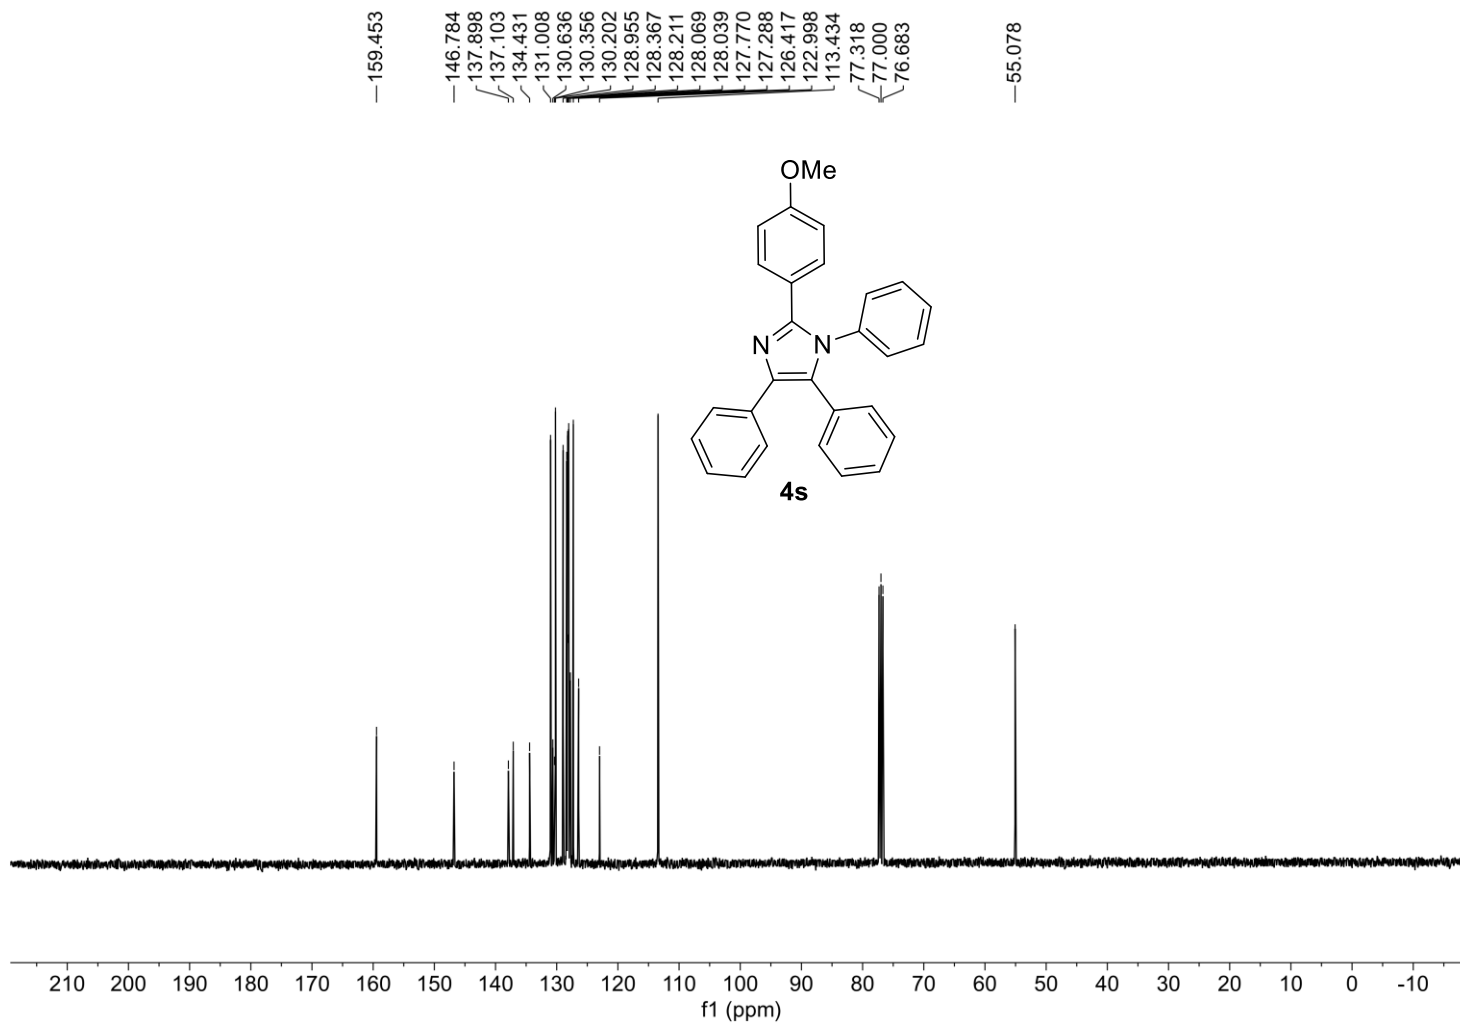



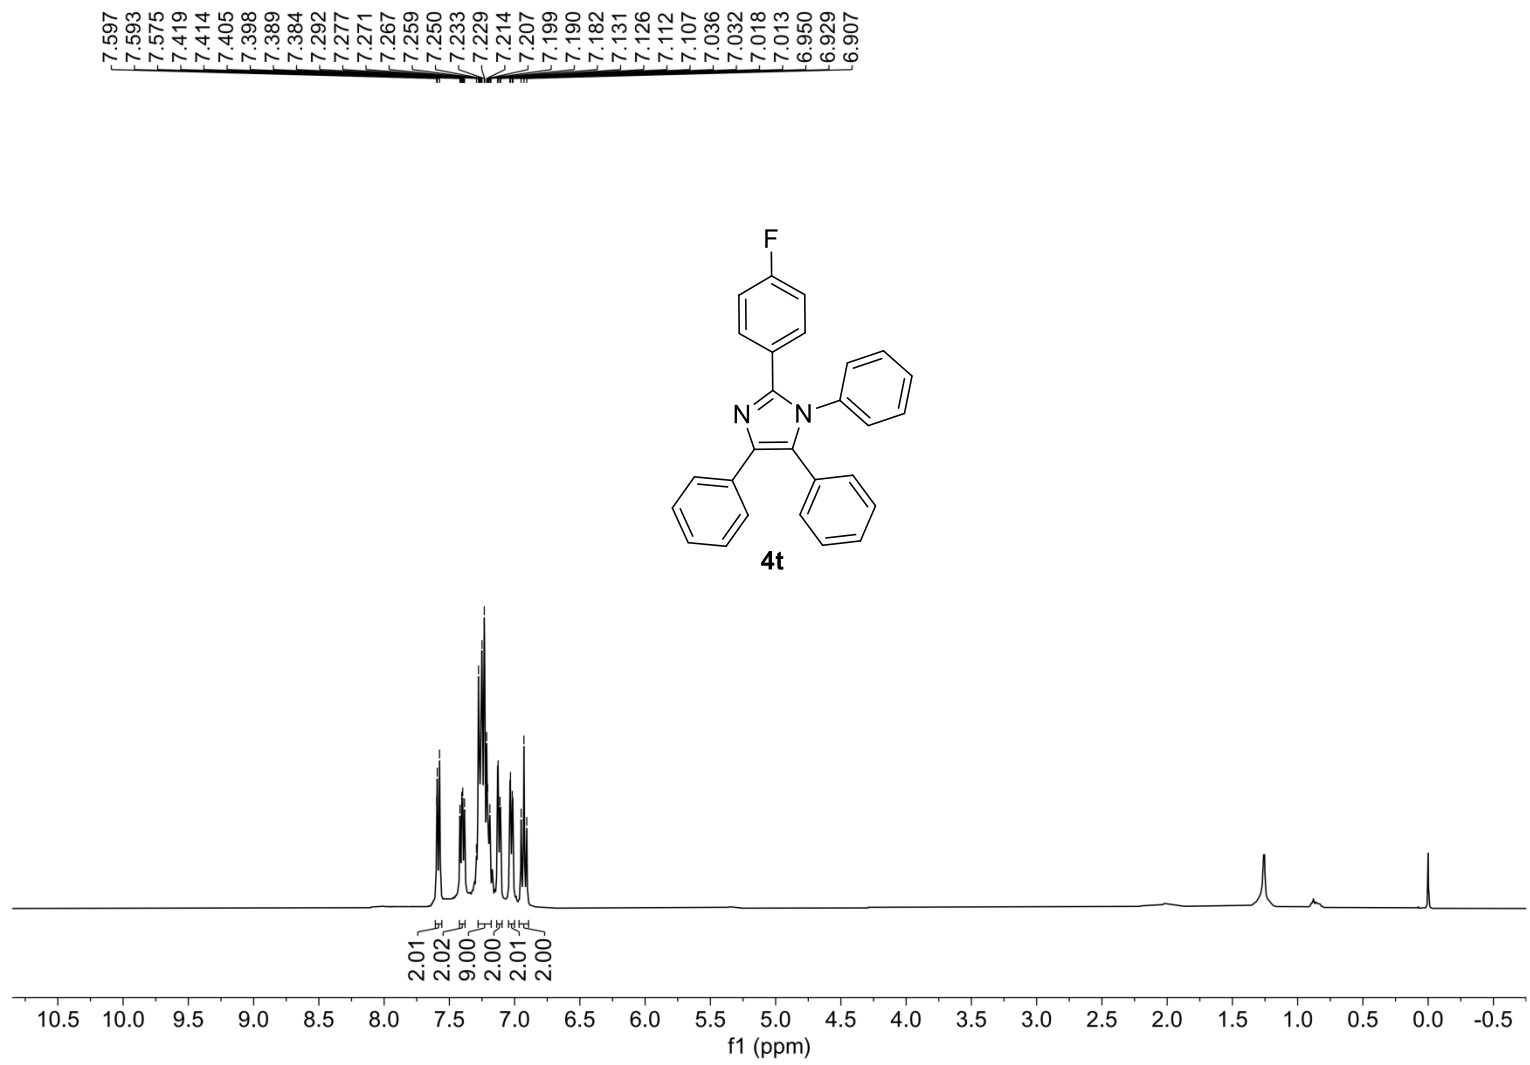

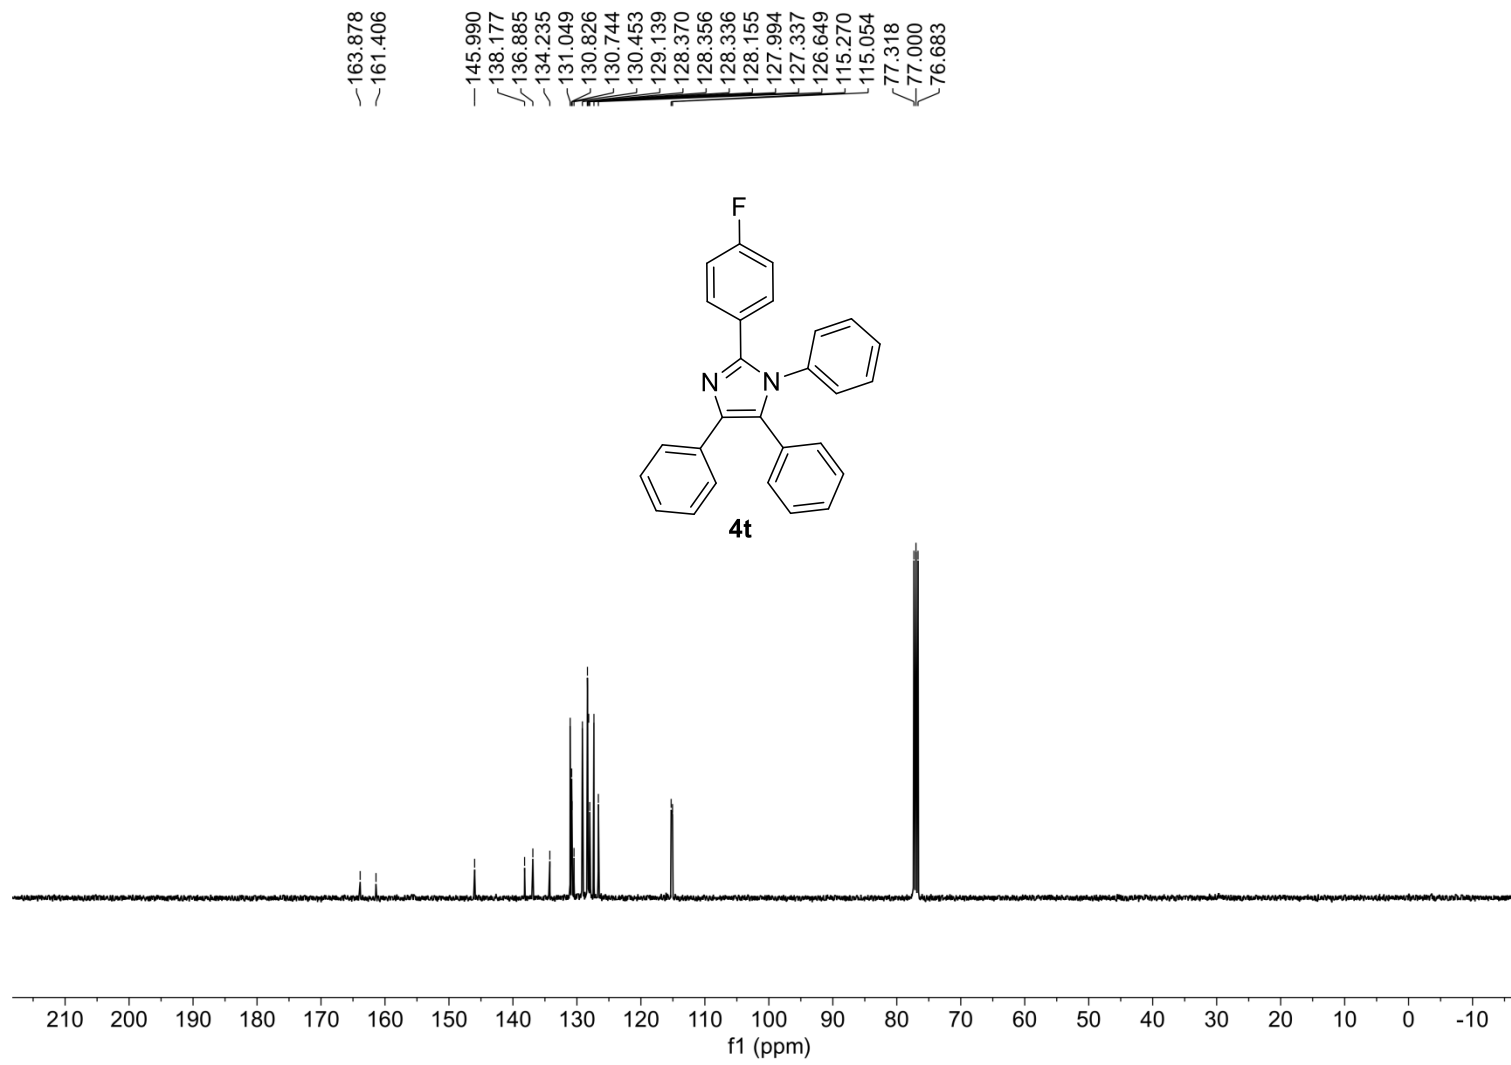

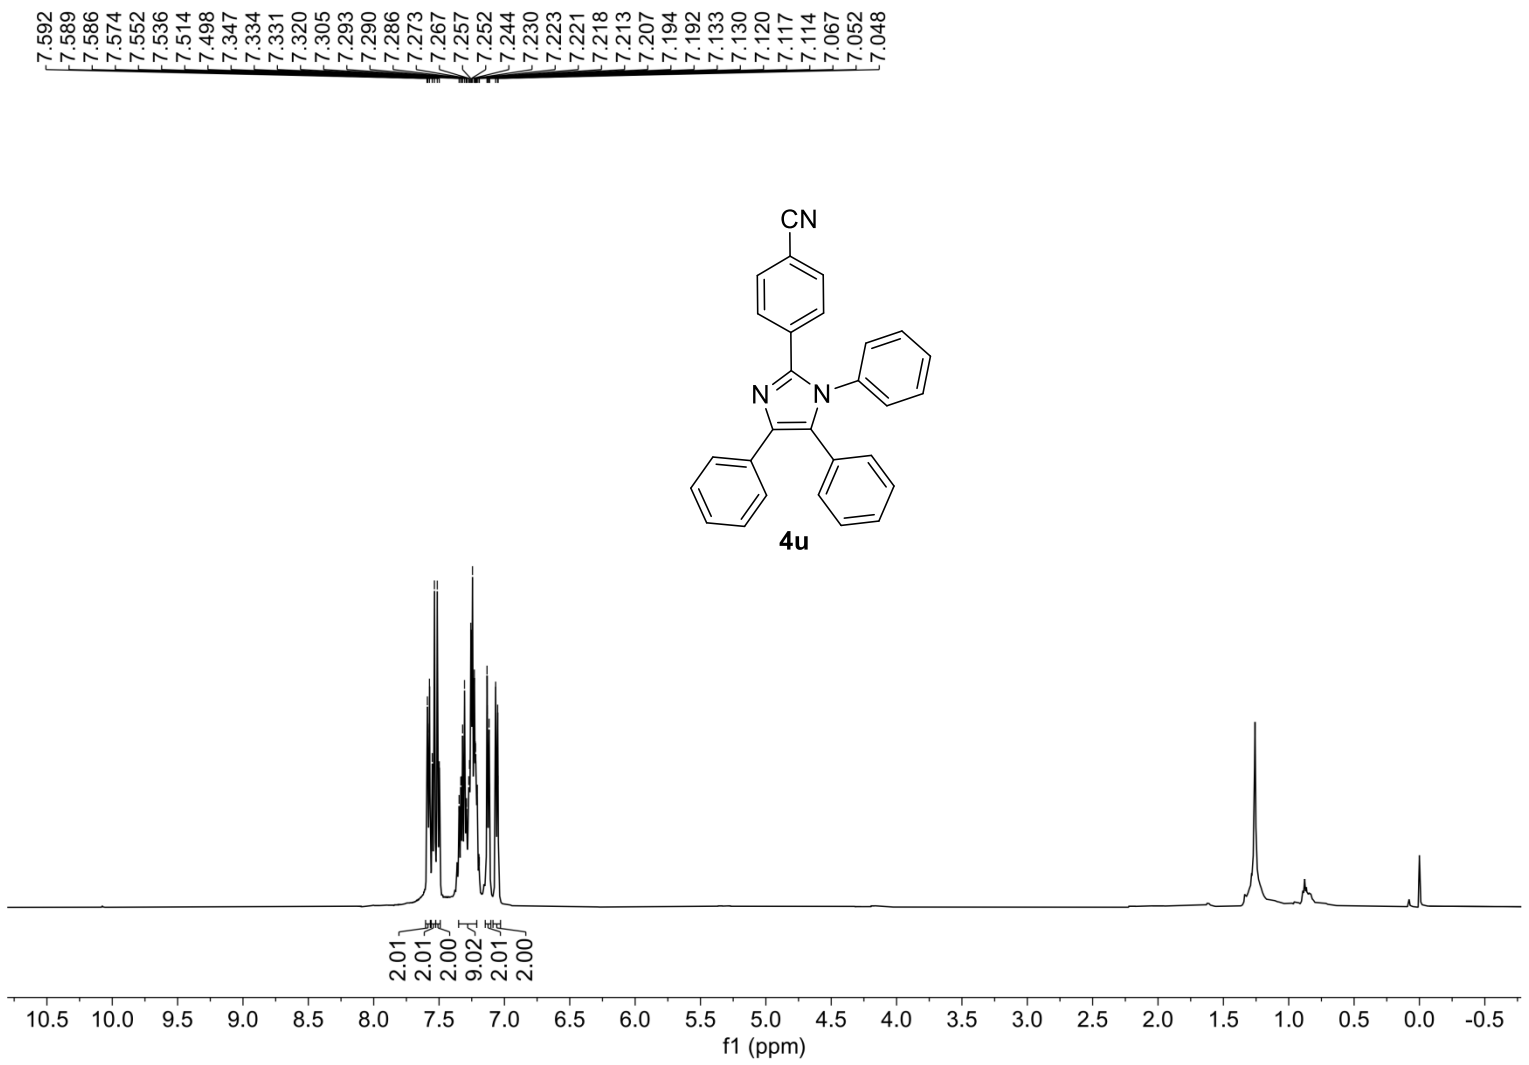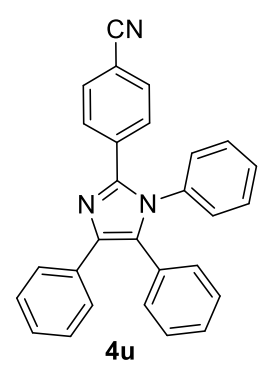

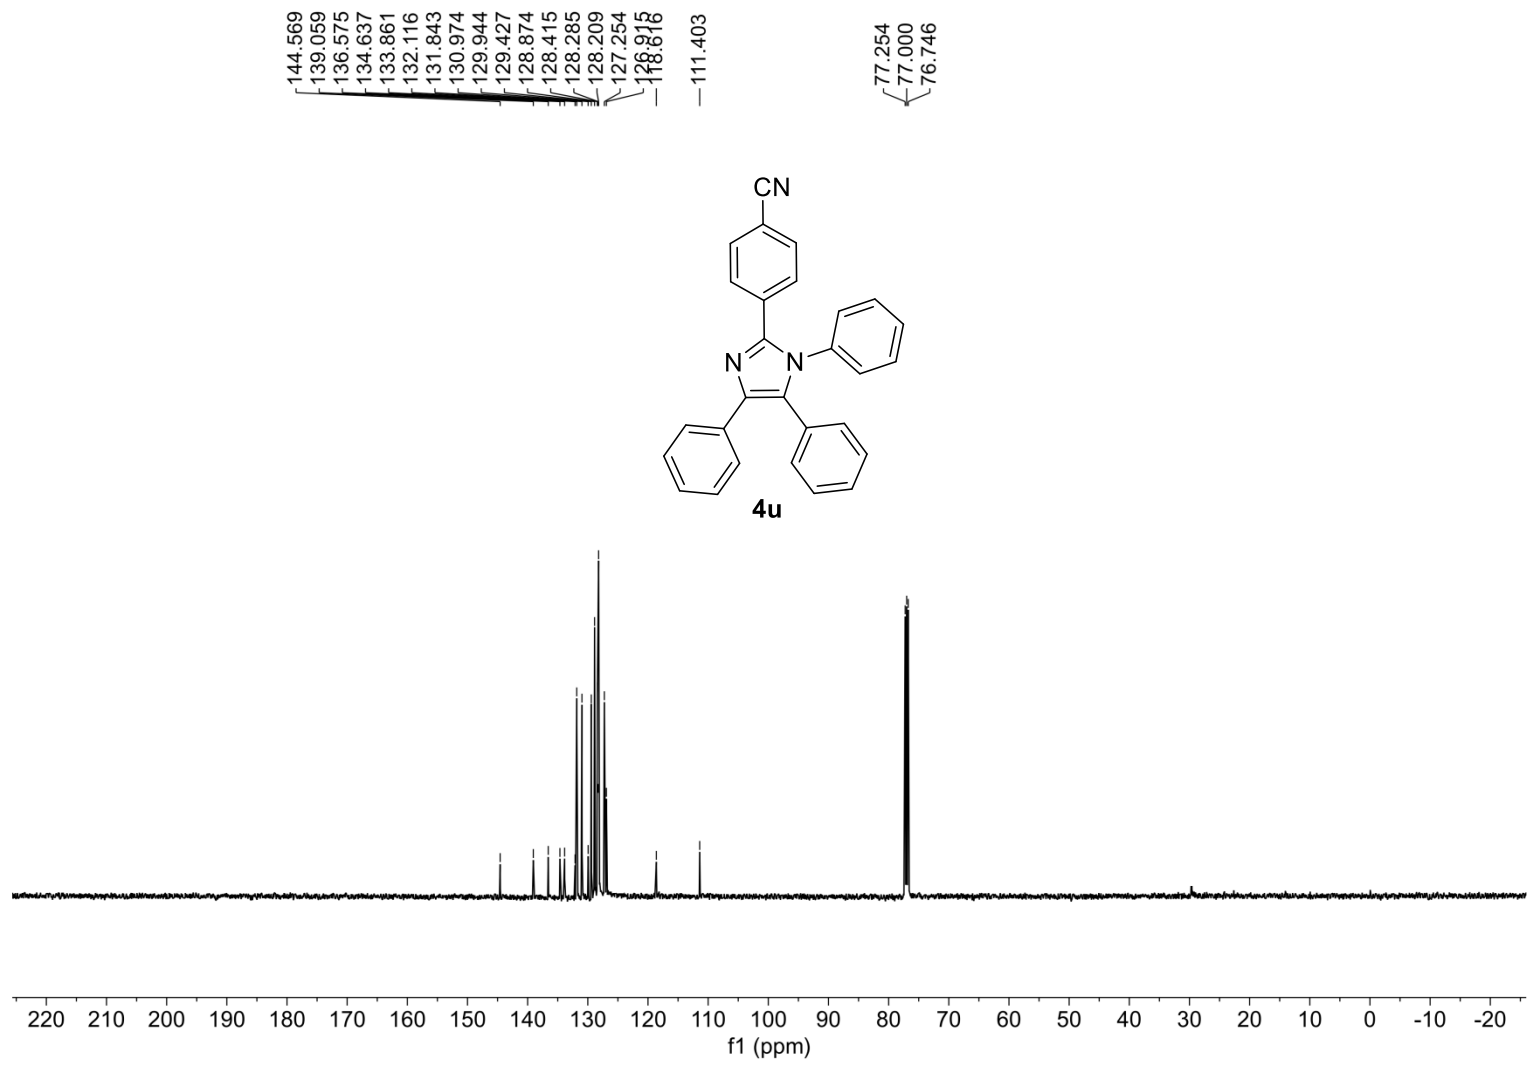

7.597  
7.578  
7.546  
7.310  
7.293  
7.274  
7.251  
7.235  
7.216  
7.194  
7.174  
7.135  
7.130  
7.116  
7.111  
7.097  
7.052  
7.035  
7.030

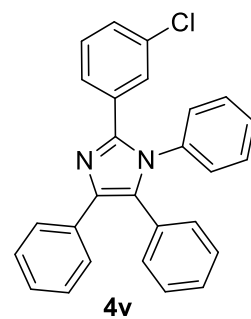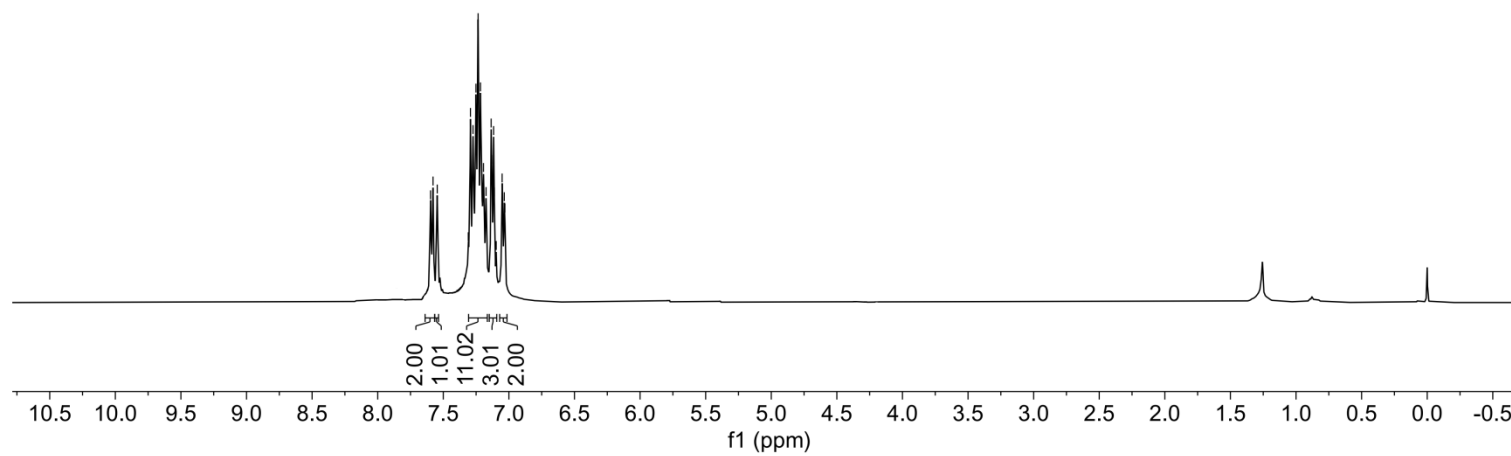

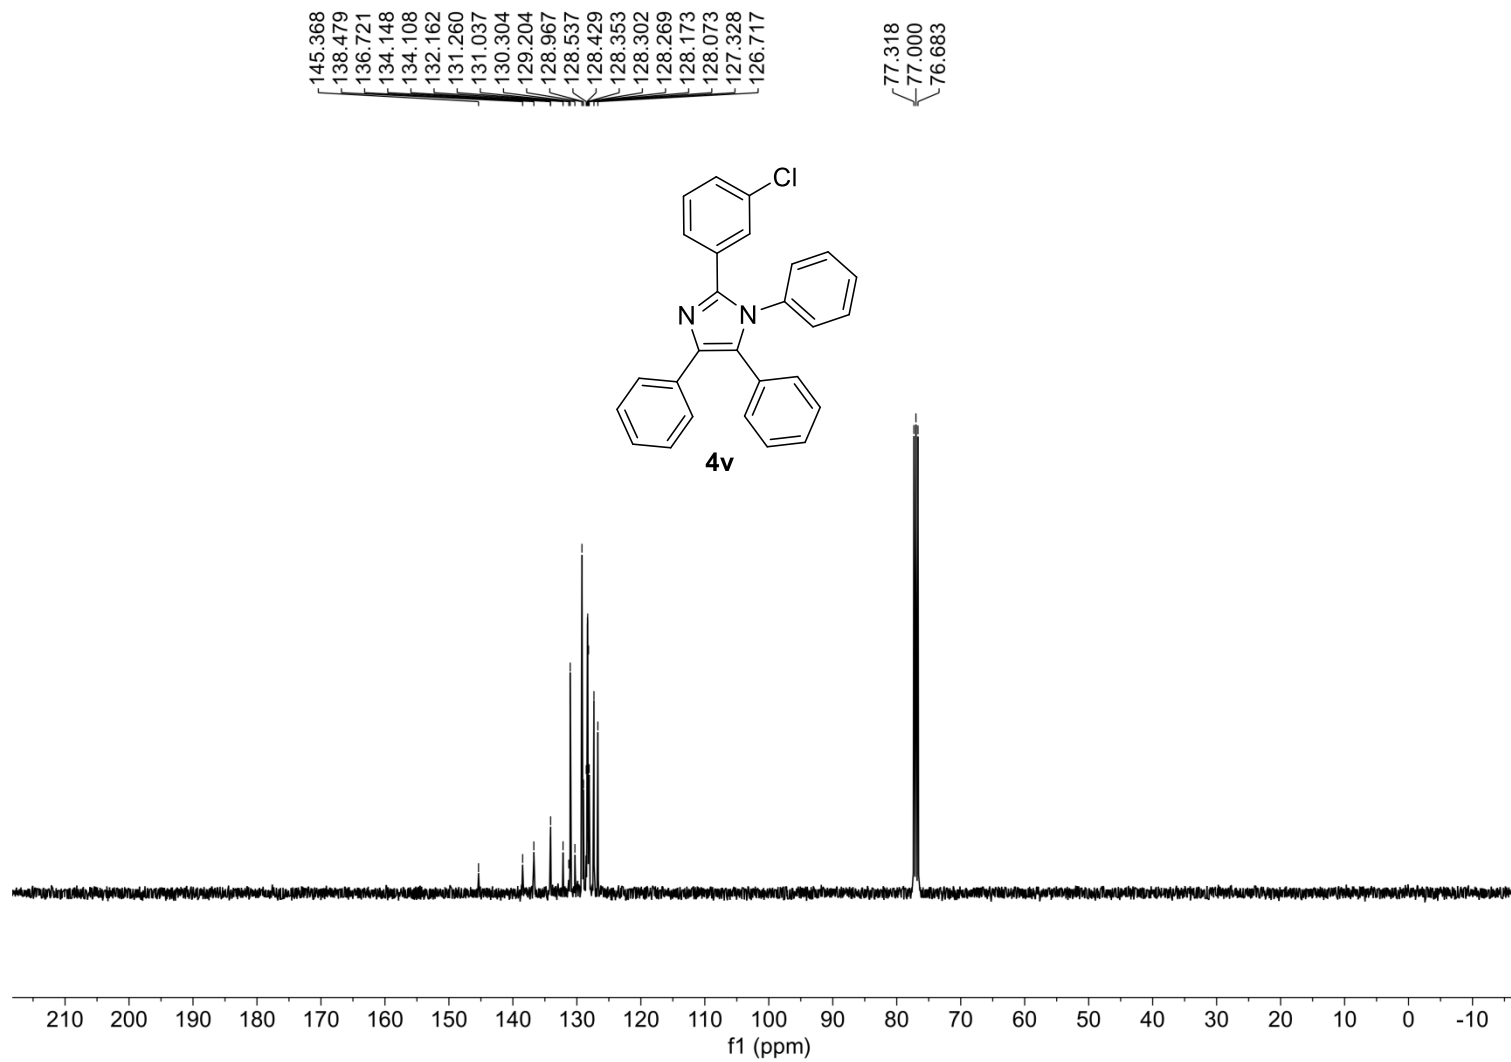

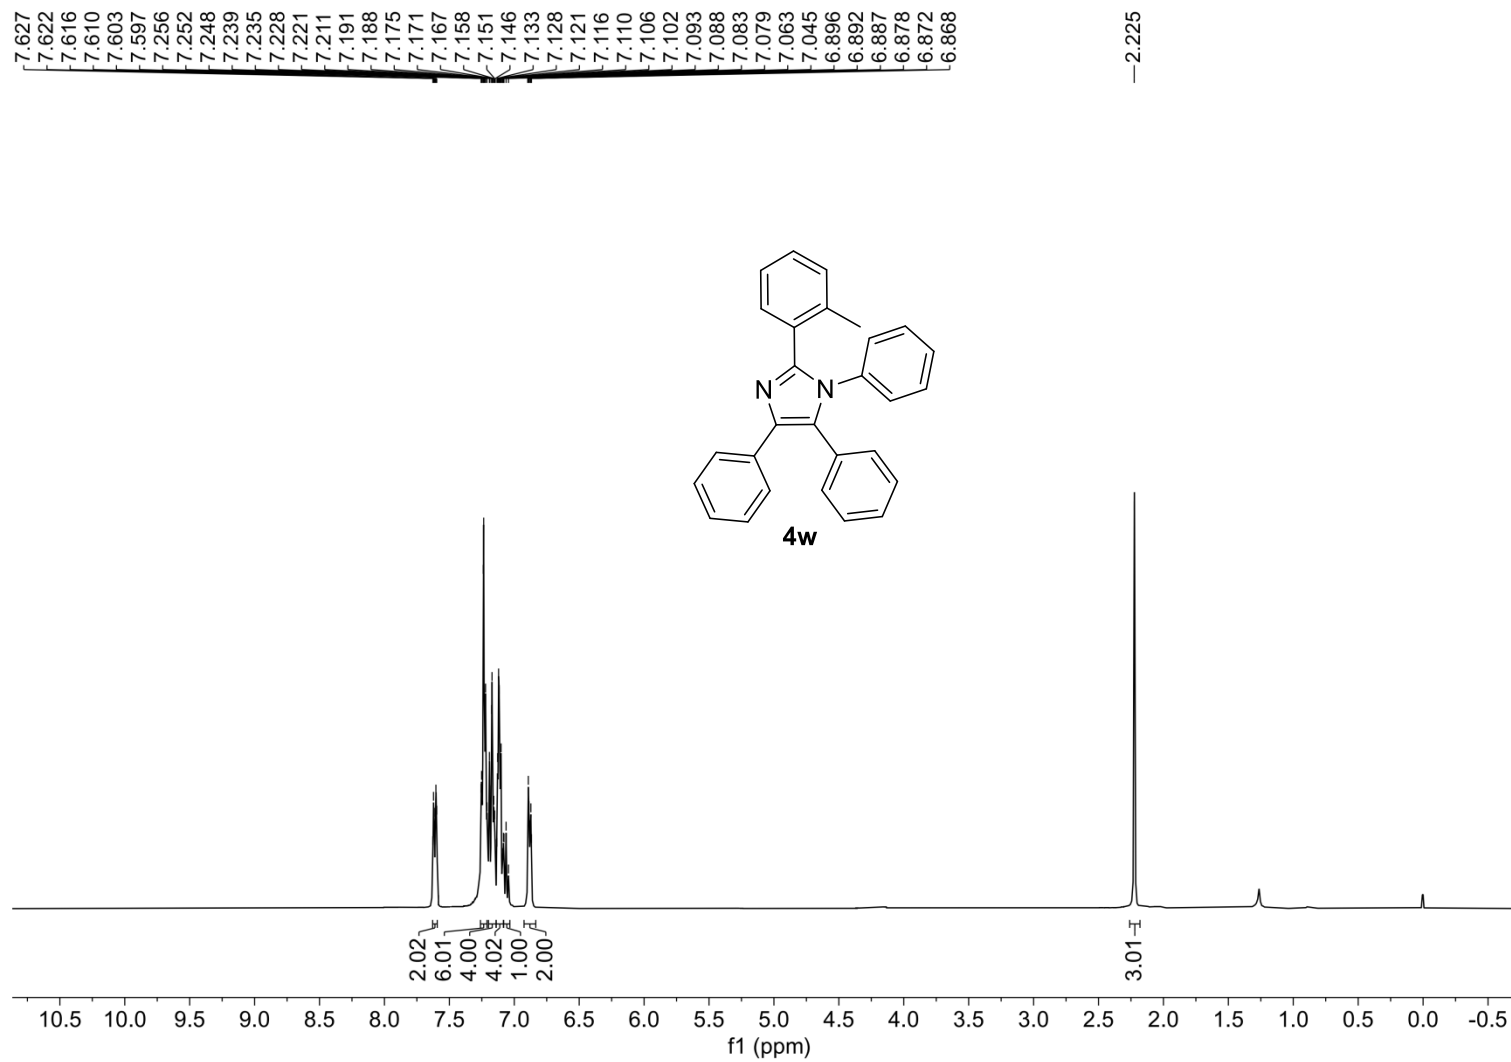

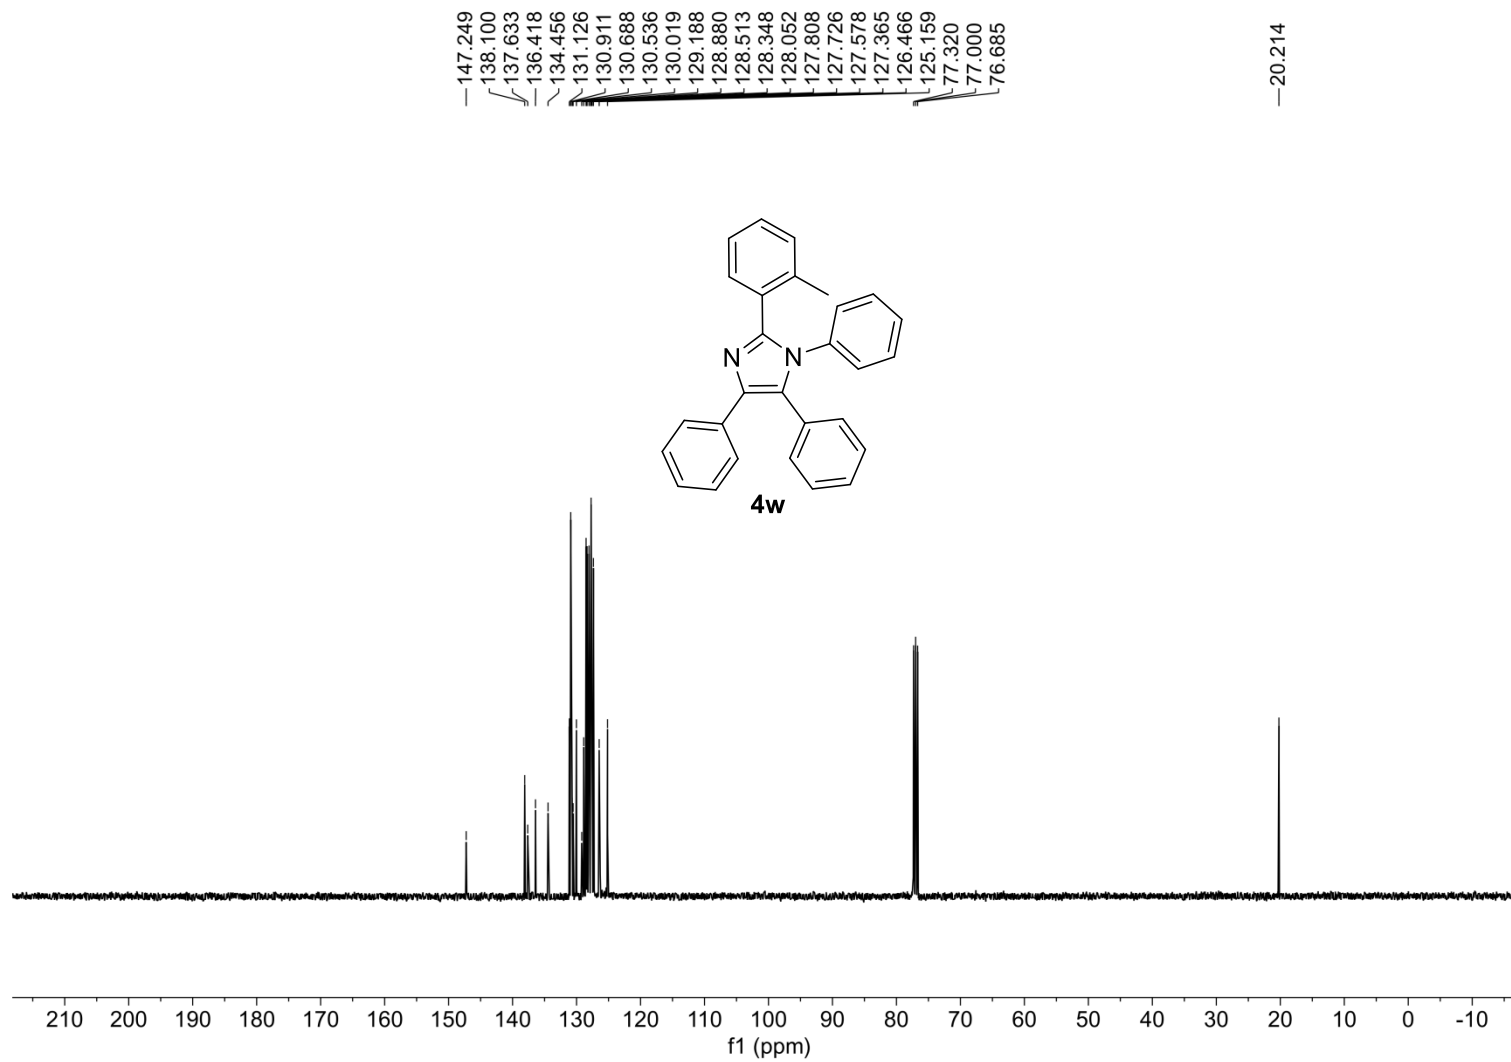



7.658  
7.654  
7.590  
7.586  
7.573  
7.317  
7.311  
7.307  
7.303  
7.298  
7.294  
7.287  
7.282  
7.273  
7.269  
7.265  
7.260  
7.258  
7.253  
7.244  
7.241  
7.236  
7.228  
7.222  
7.219  
7.207  
7.201  
7.198  
7.194  
7.190  
7.187  
7.182  
7.126  
7.122  
7.109  
7.105  
7.052  
7.049  
7.036  
7.032

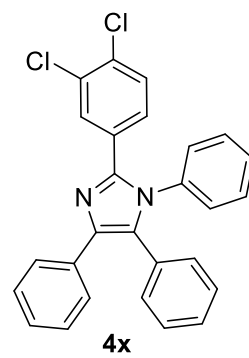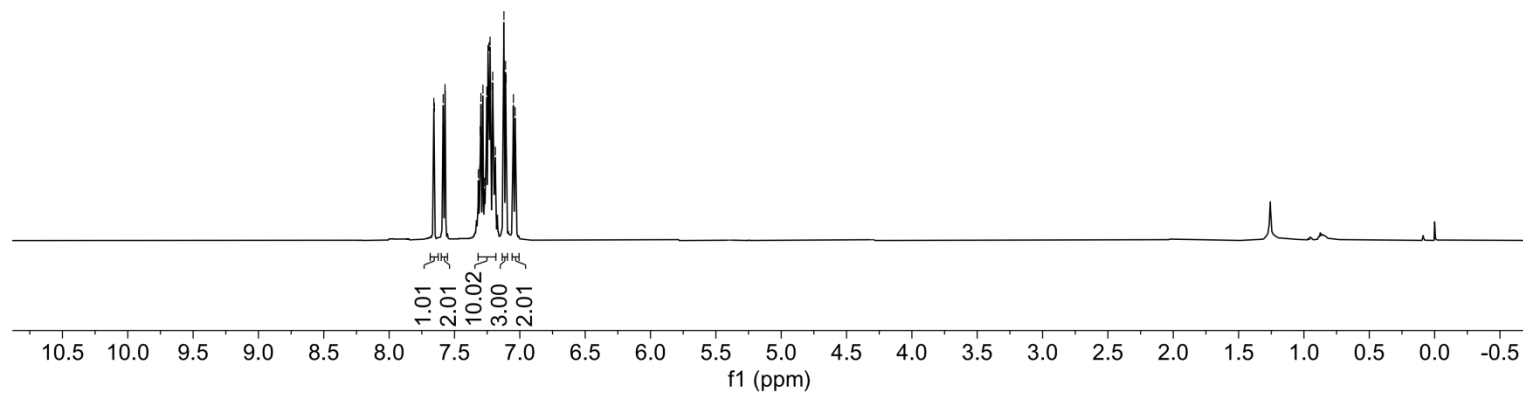

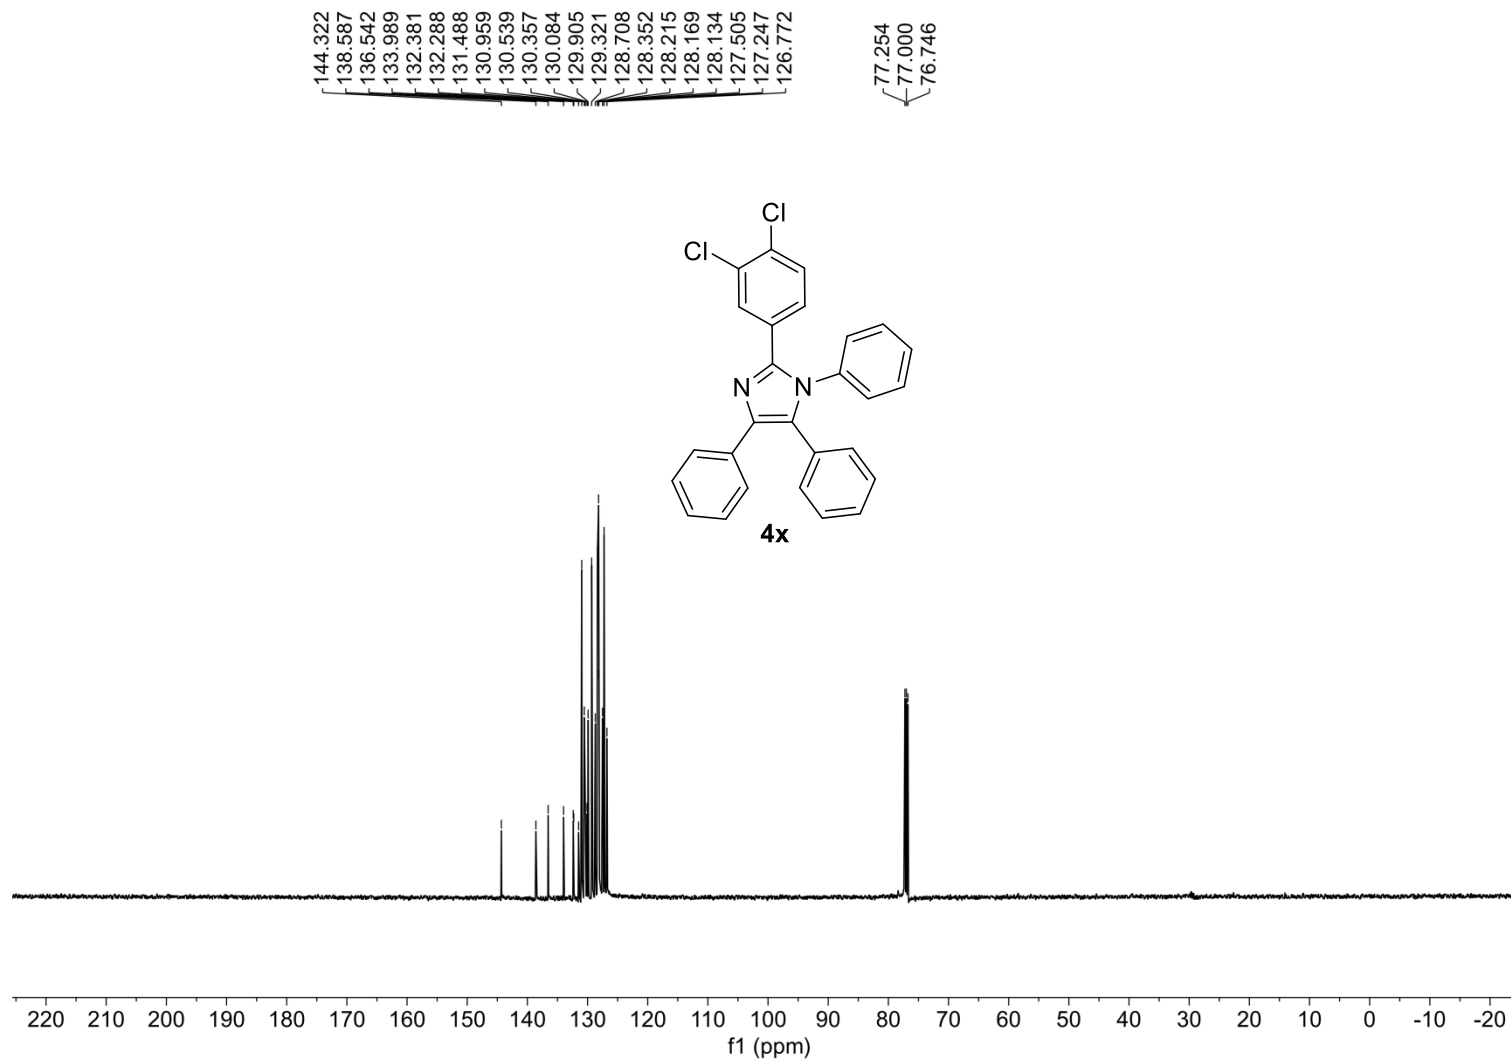

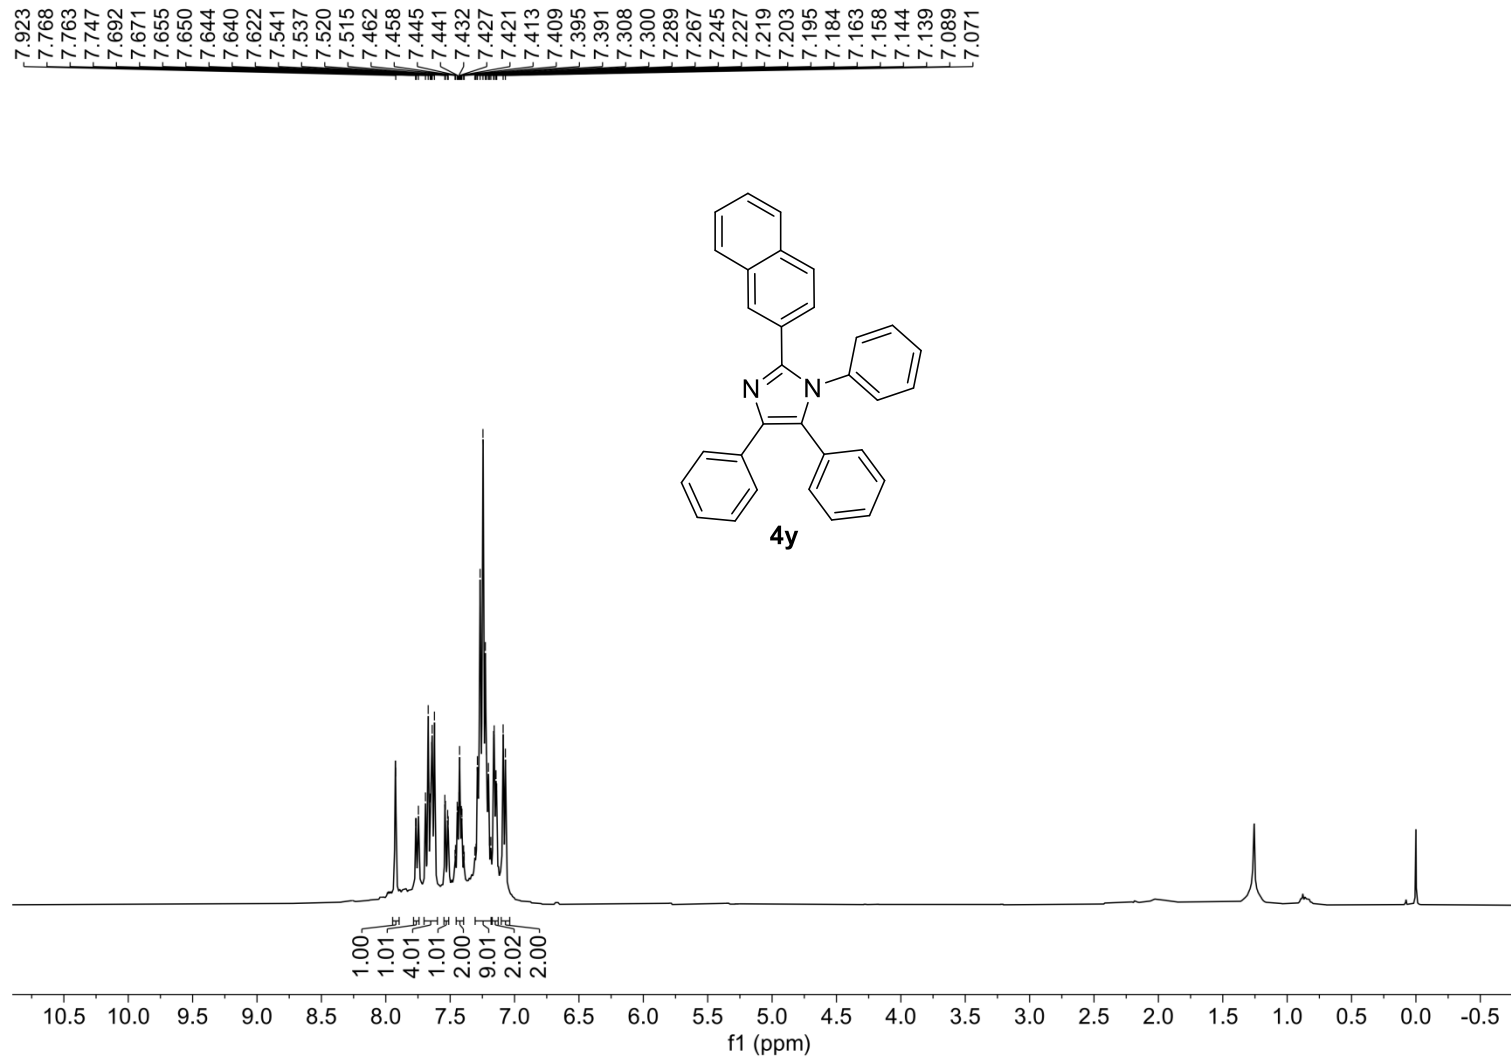

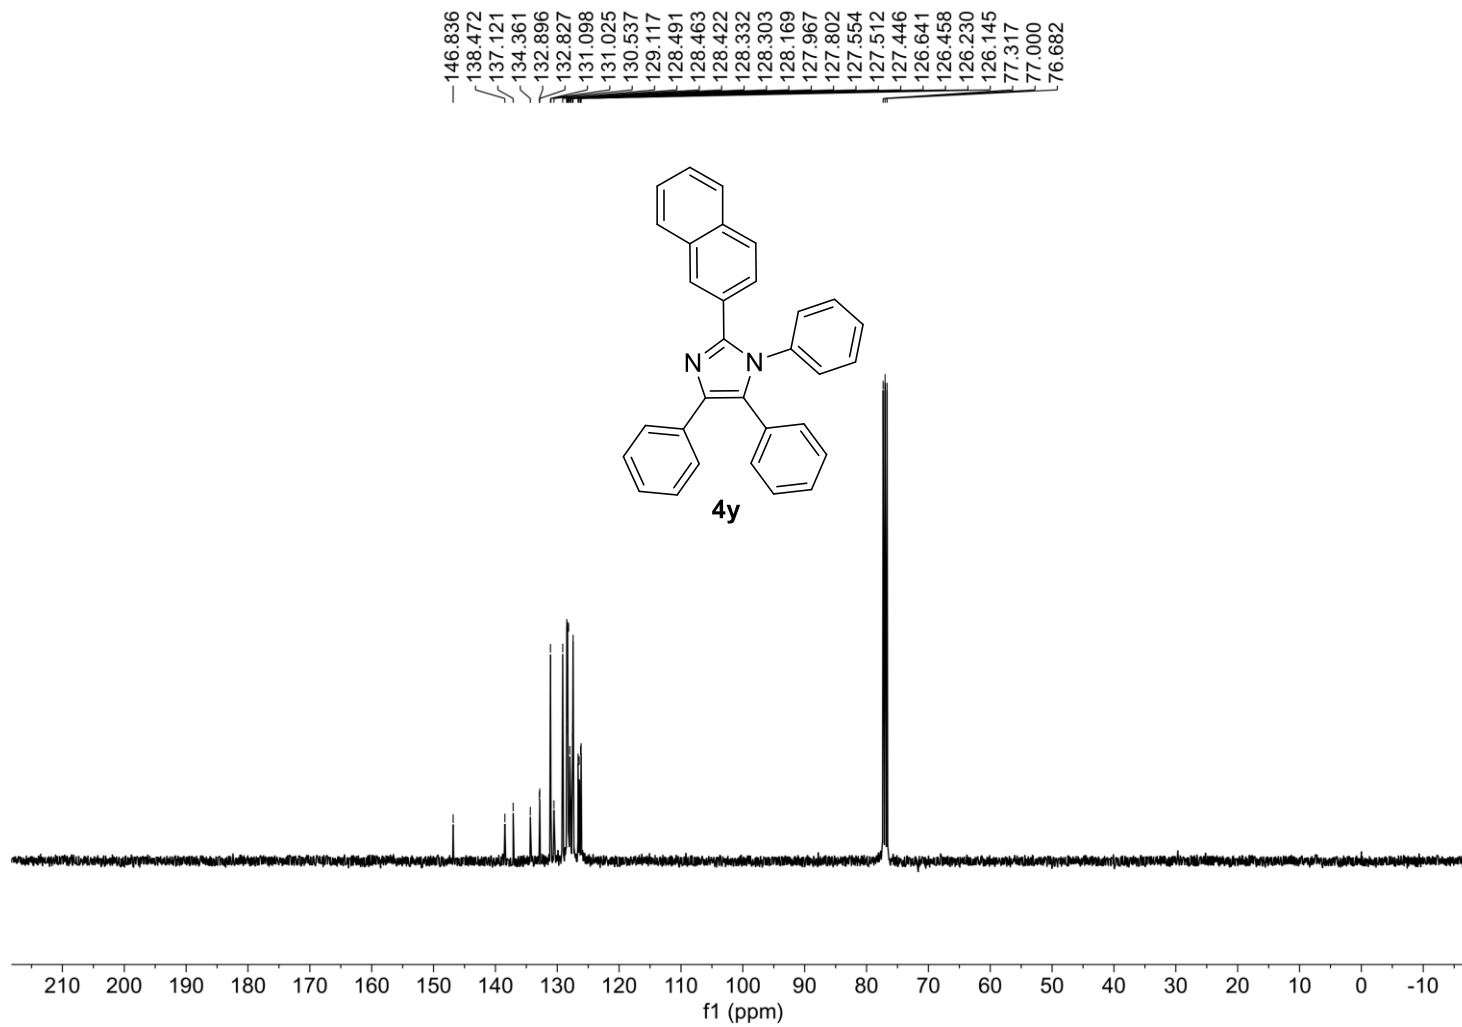

7.605  
7.602  
7.598  
7.591  
7.588  
7.581  
7.376  
7.371  
7.366  
7.363  
7.359  
7.355  
7.349  
7.344  
7.338  
7.335  
7.330  
7.254  
7.251  
7.247  
7.240  
7.237  
7.234  
7.224  
7.221  
7.216  
7.209  
7.205  
7.201  
7.195  
7.191  
7.179  
7.176  
7.172  
7.148  
7.145  
7.141  
7.137  
7.133  
7.129  
6.842  
6.835  
6.832  
6.824  
6.677  
6.674  
6.669  
6.667

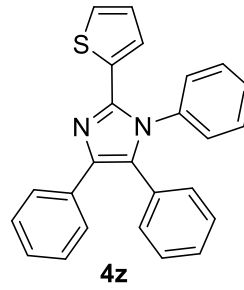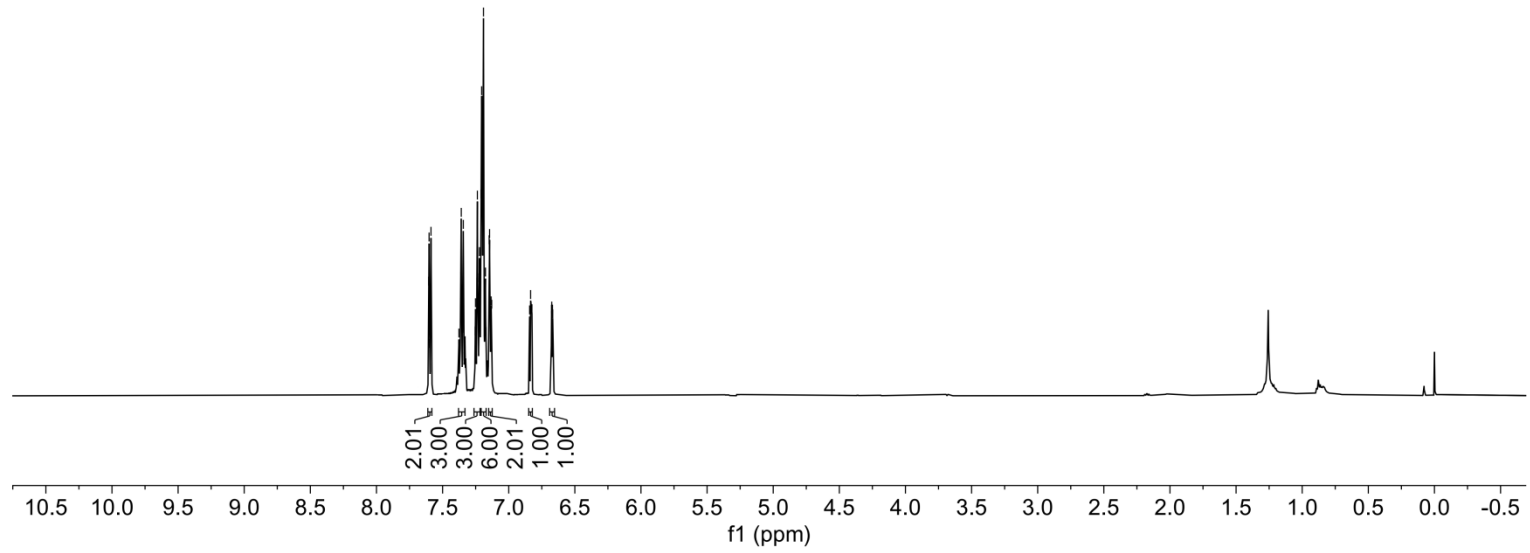

142.145  
138.229  
136.567  
134.115  
133.089  
130.947  
130.222  
129.281  
129.081  
128.931  
128.287  
128.092  
127.976  
127.285  
127.072  
126.619  
126.297  
126.125

77.254  
77.000  
76.745

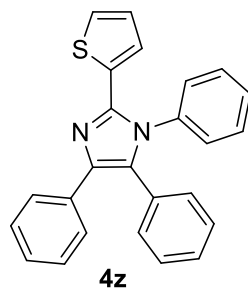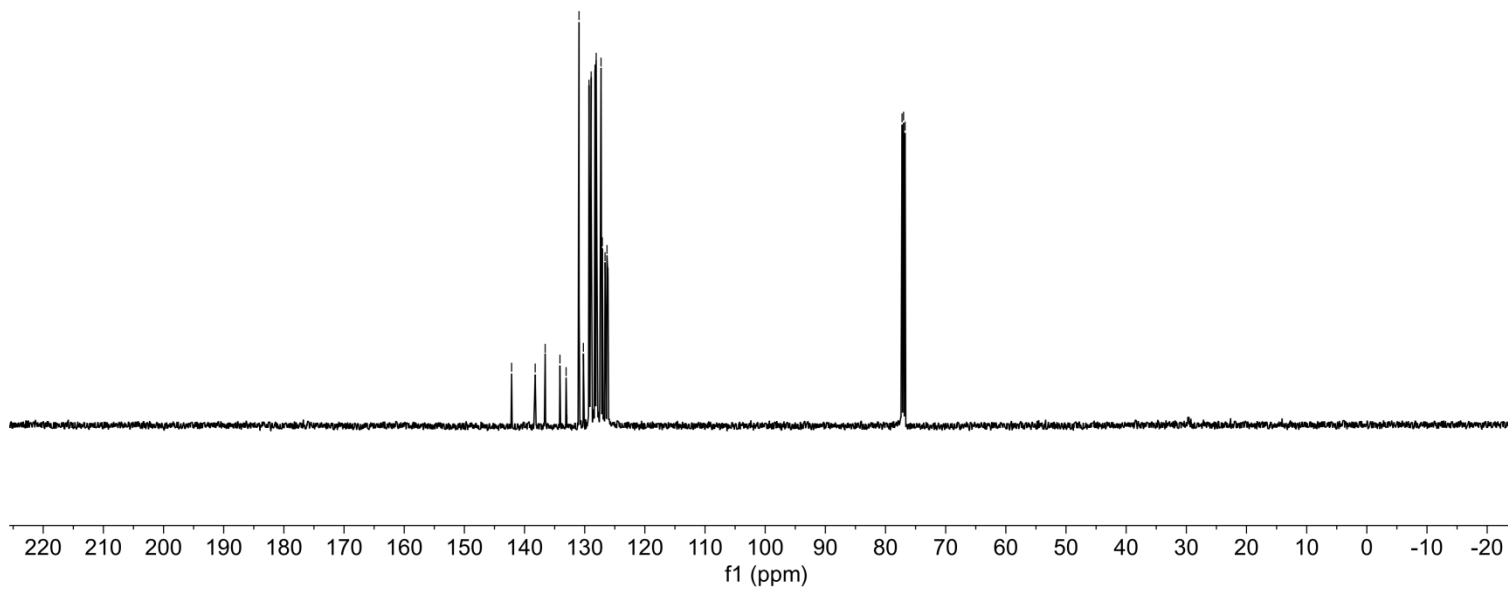

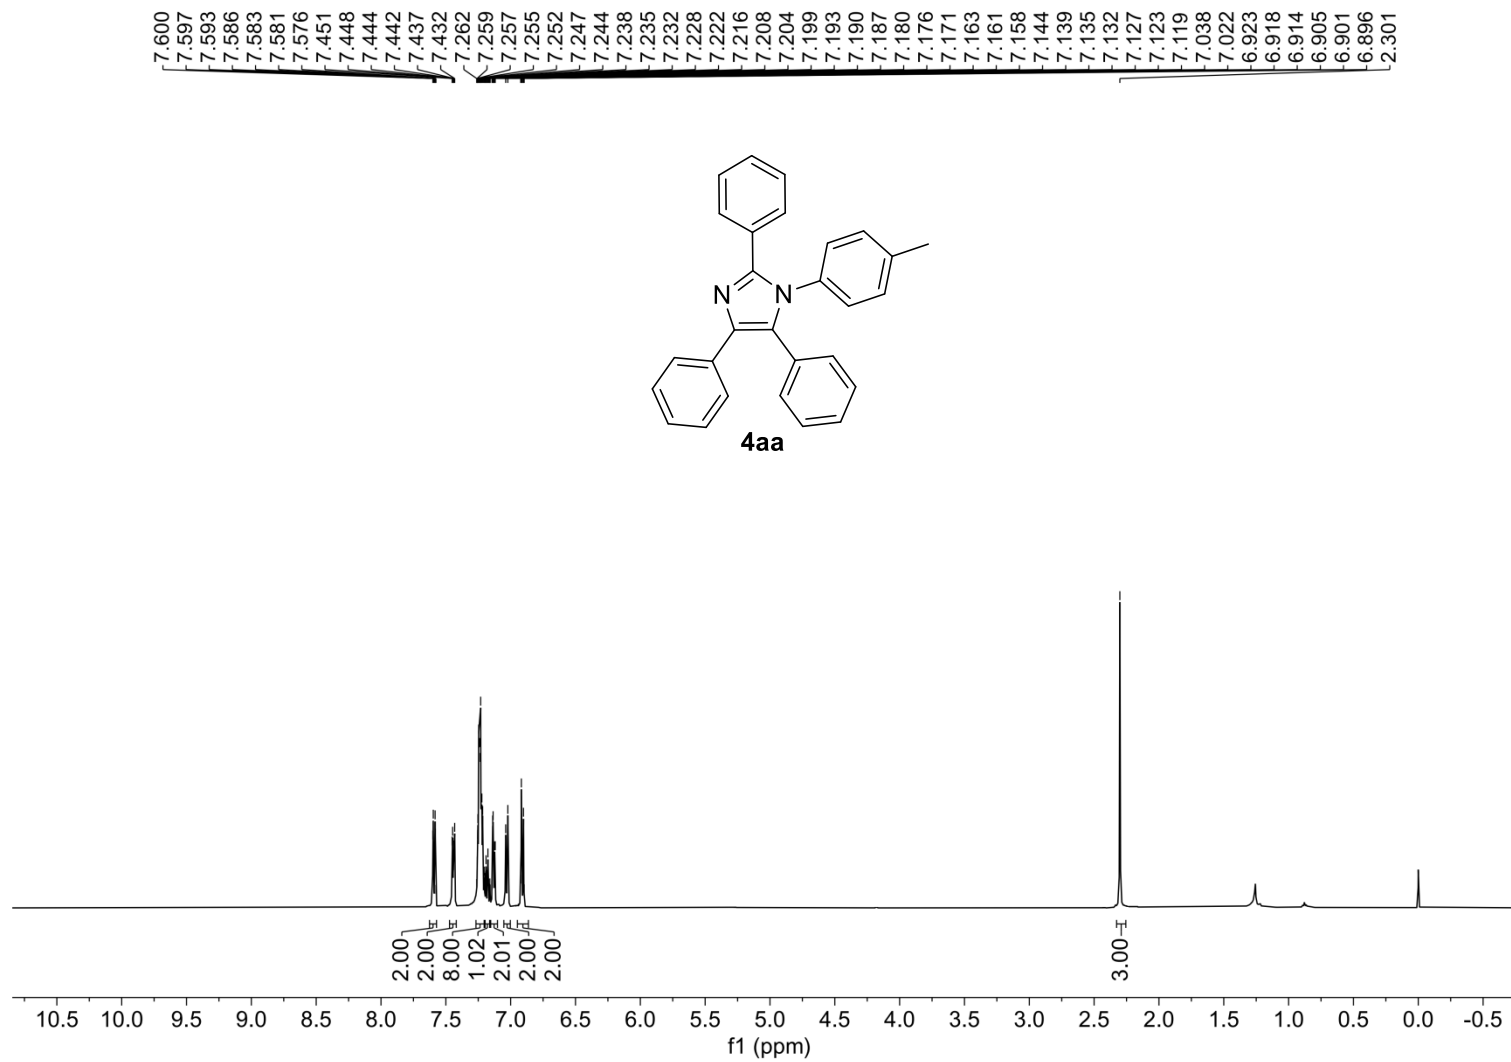

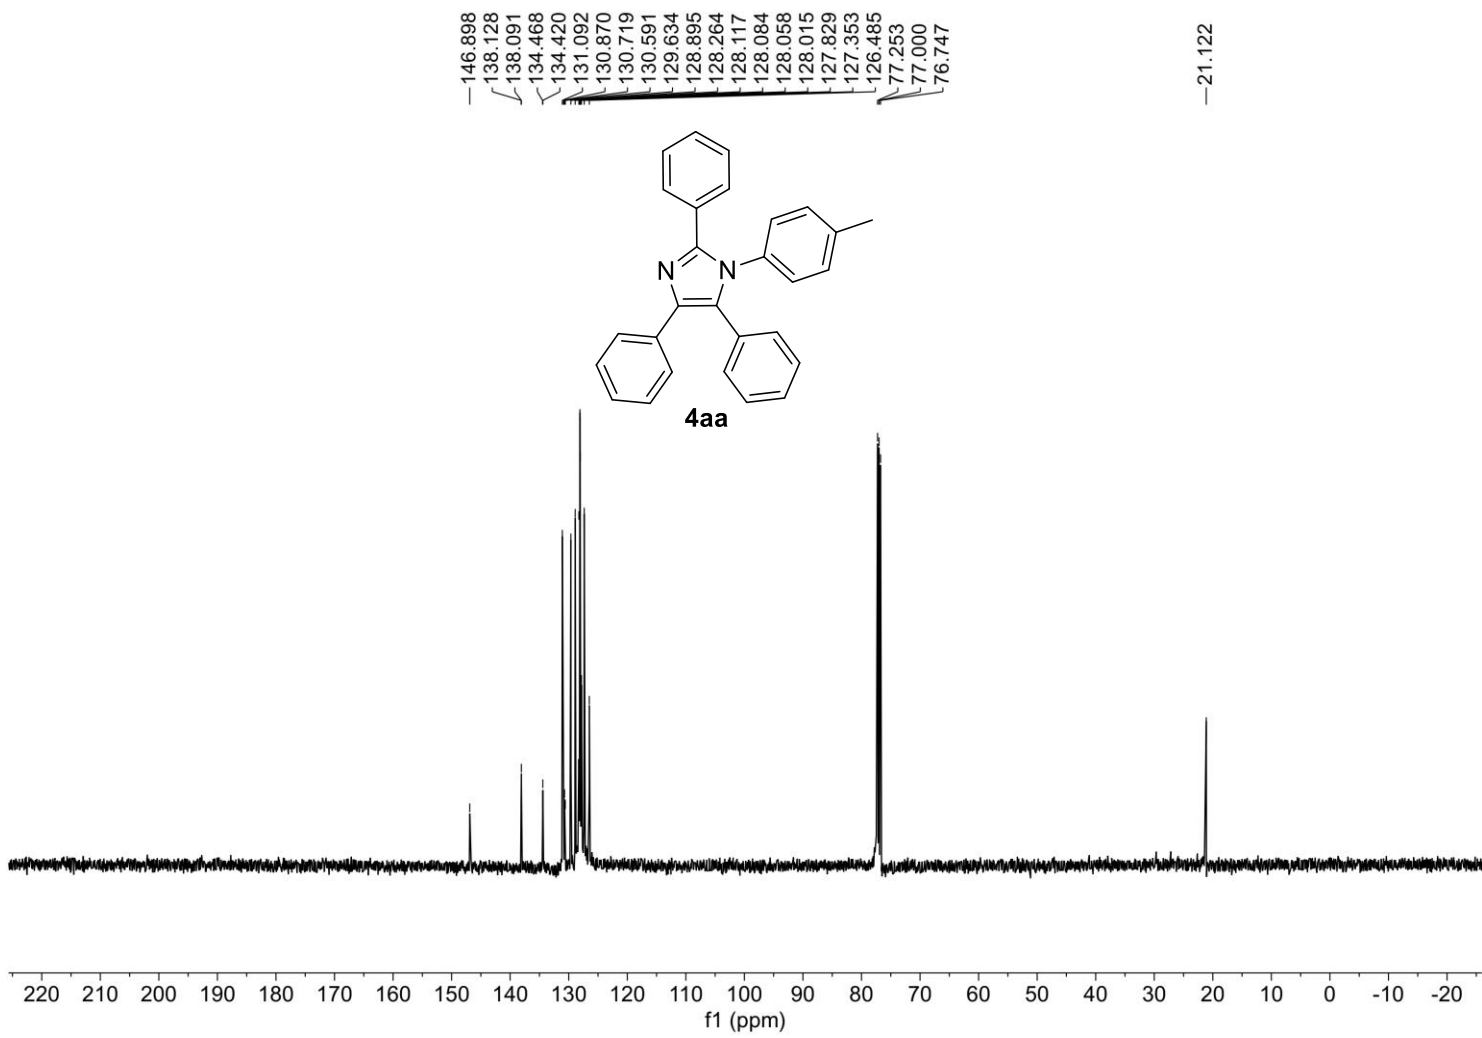



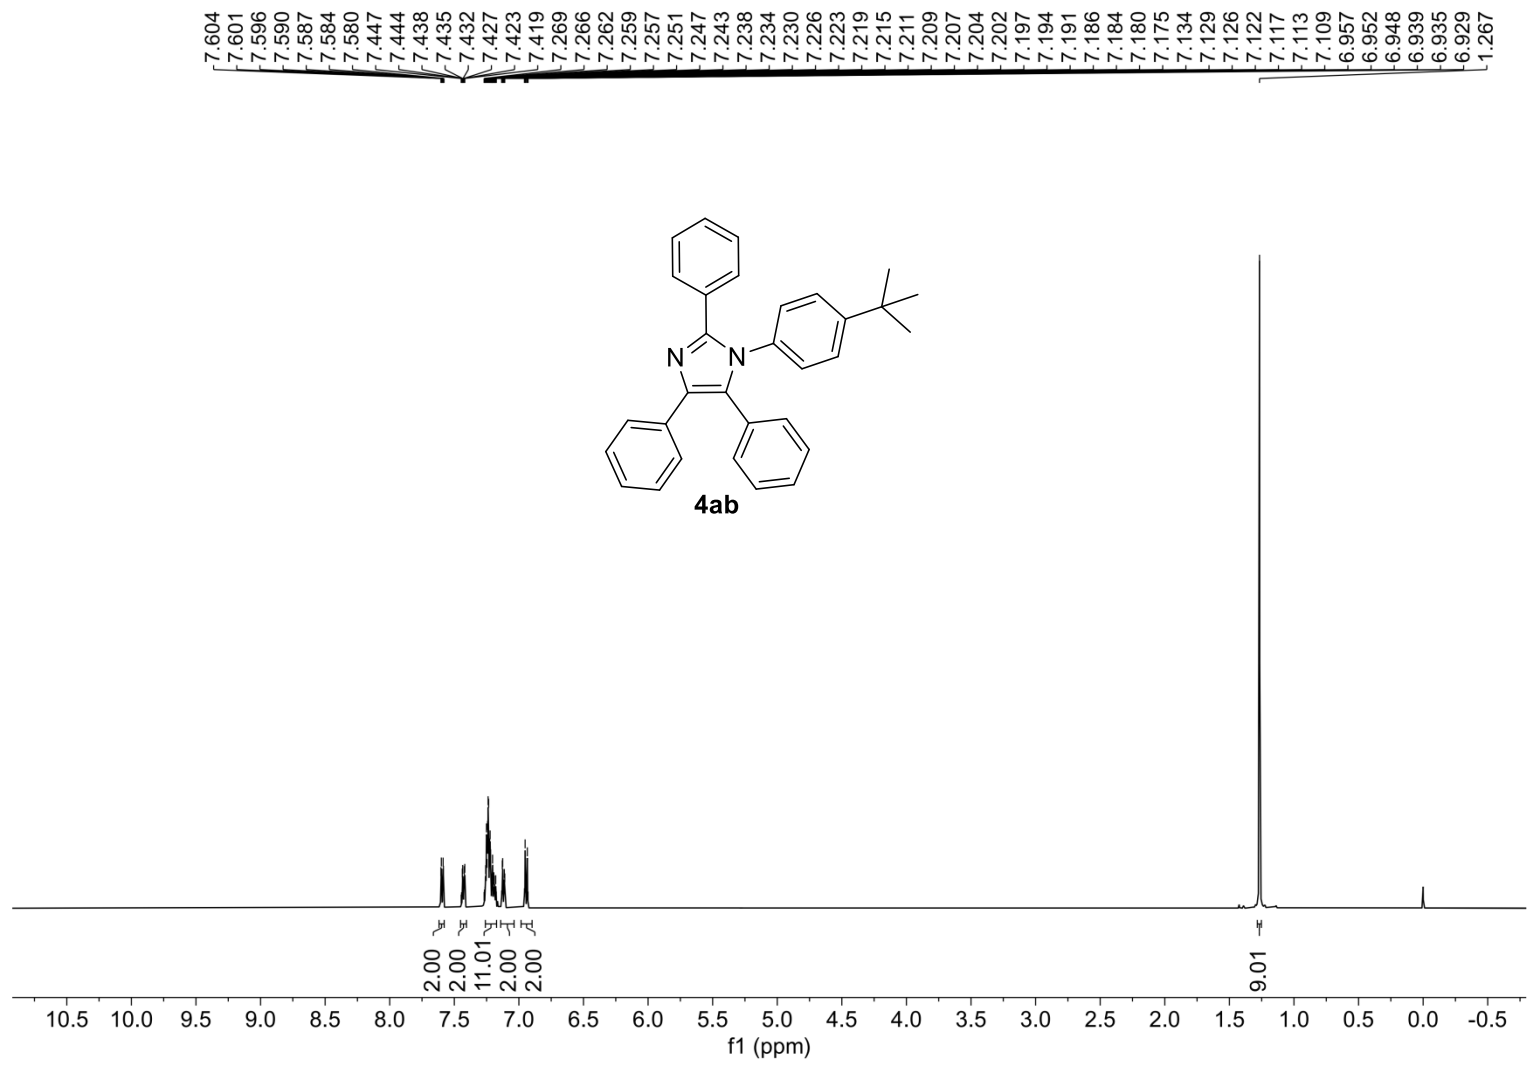

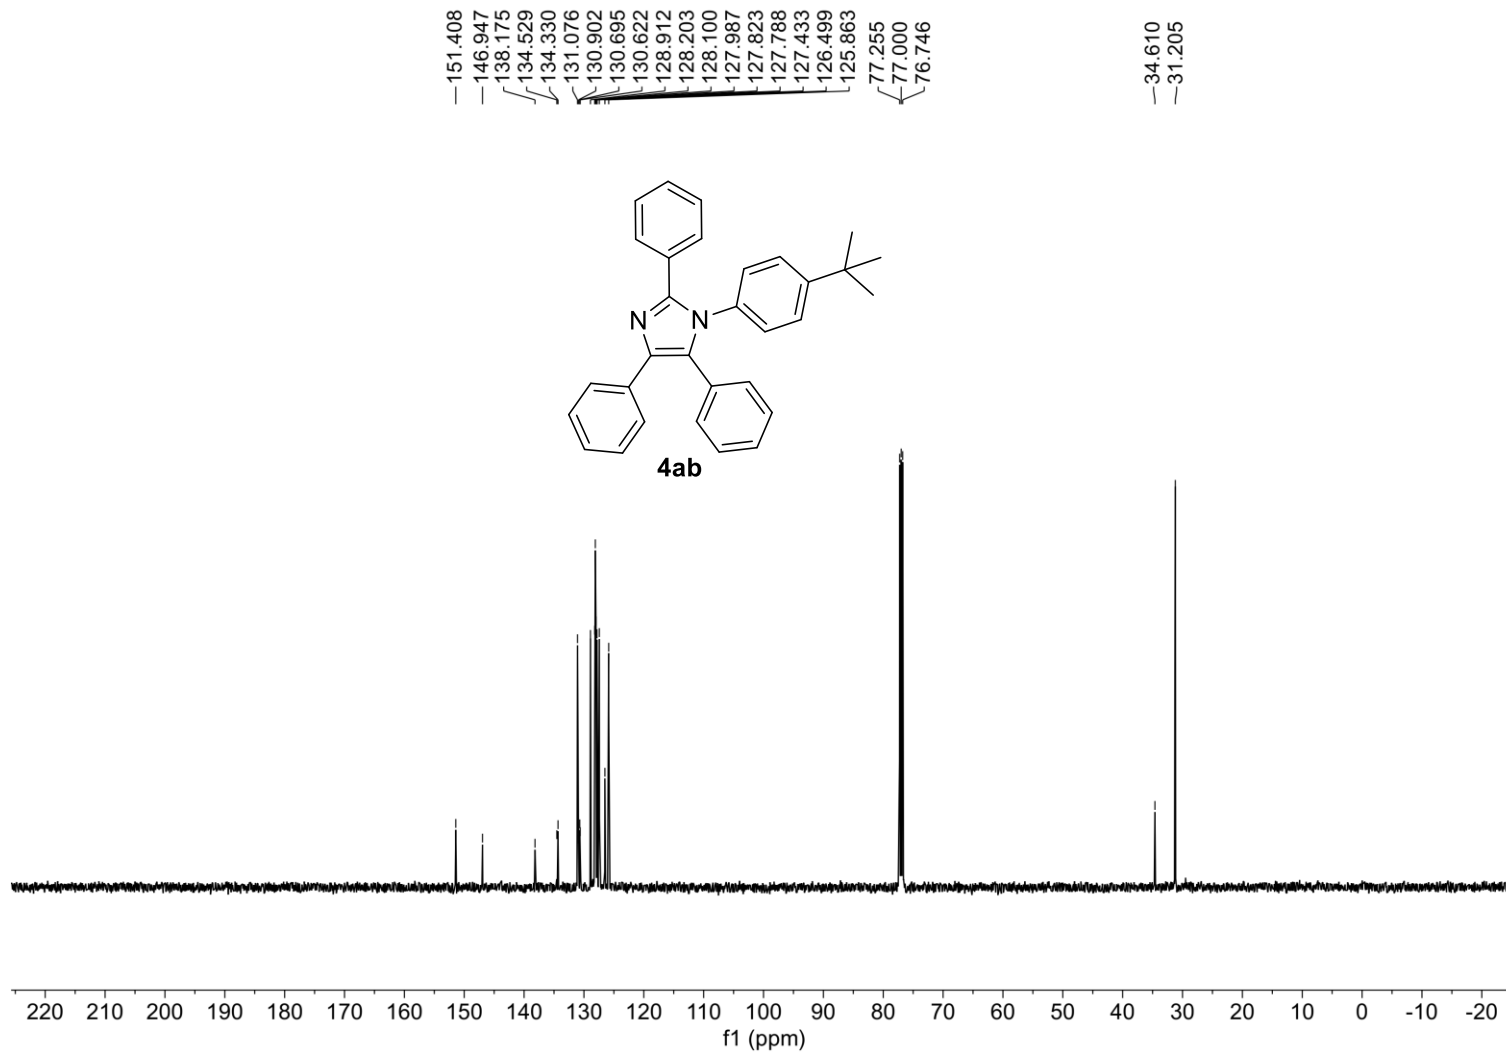

7.601  
7.597  
7.579  
7.415  
7.410  
7.396  
7.390  
7.305  
7.298  
7.291  
7.281  
7.276  
7.269  
7.262  
7.258  
7.248  
7.243  
7.229  
7.221  
7.214  
7.209  
7.205  
7.198  
7.192  
7.184  
7.174  
7.175  
7.125  
7.120  
7.105  
7.101  
7.082  
7.062  
7.056  
7.049  
7.039  
7.033

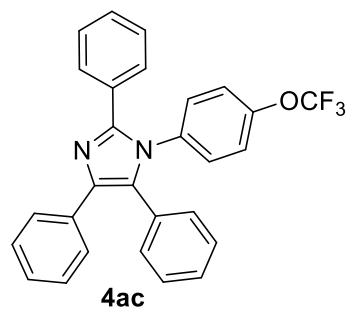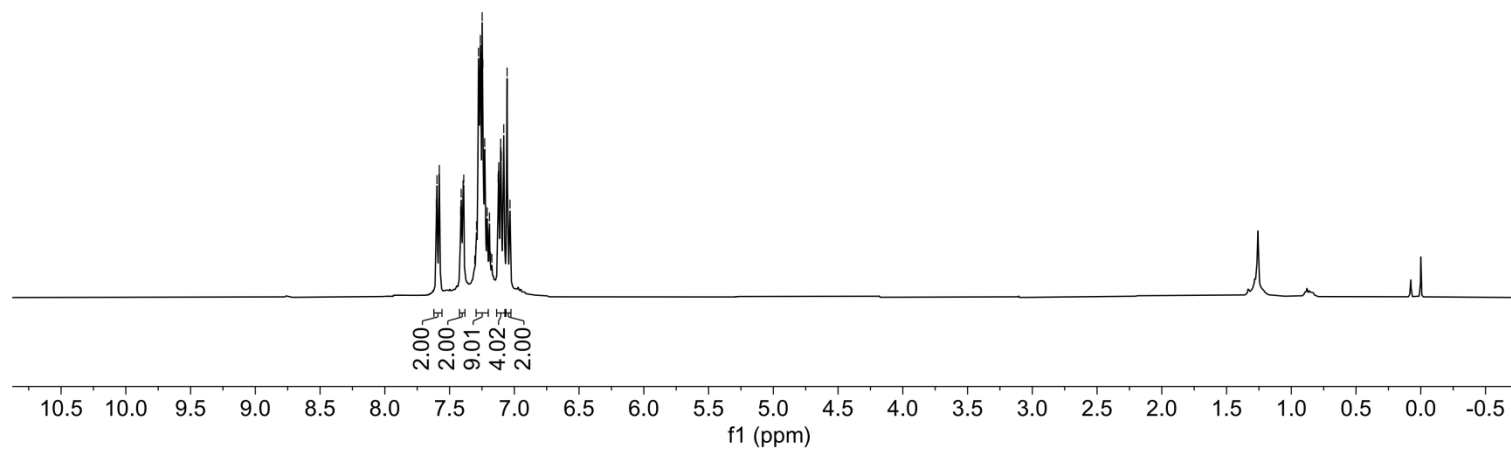

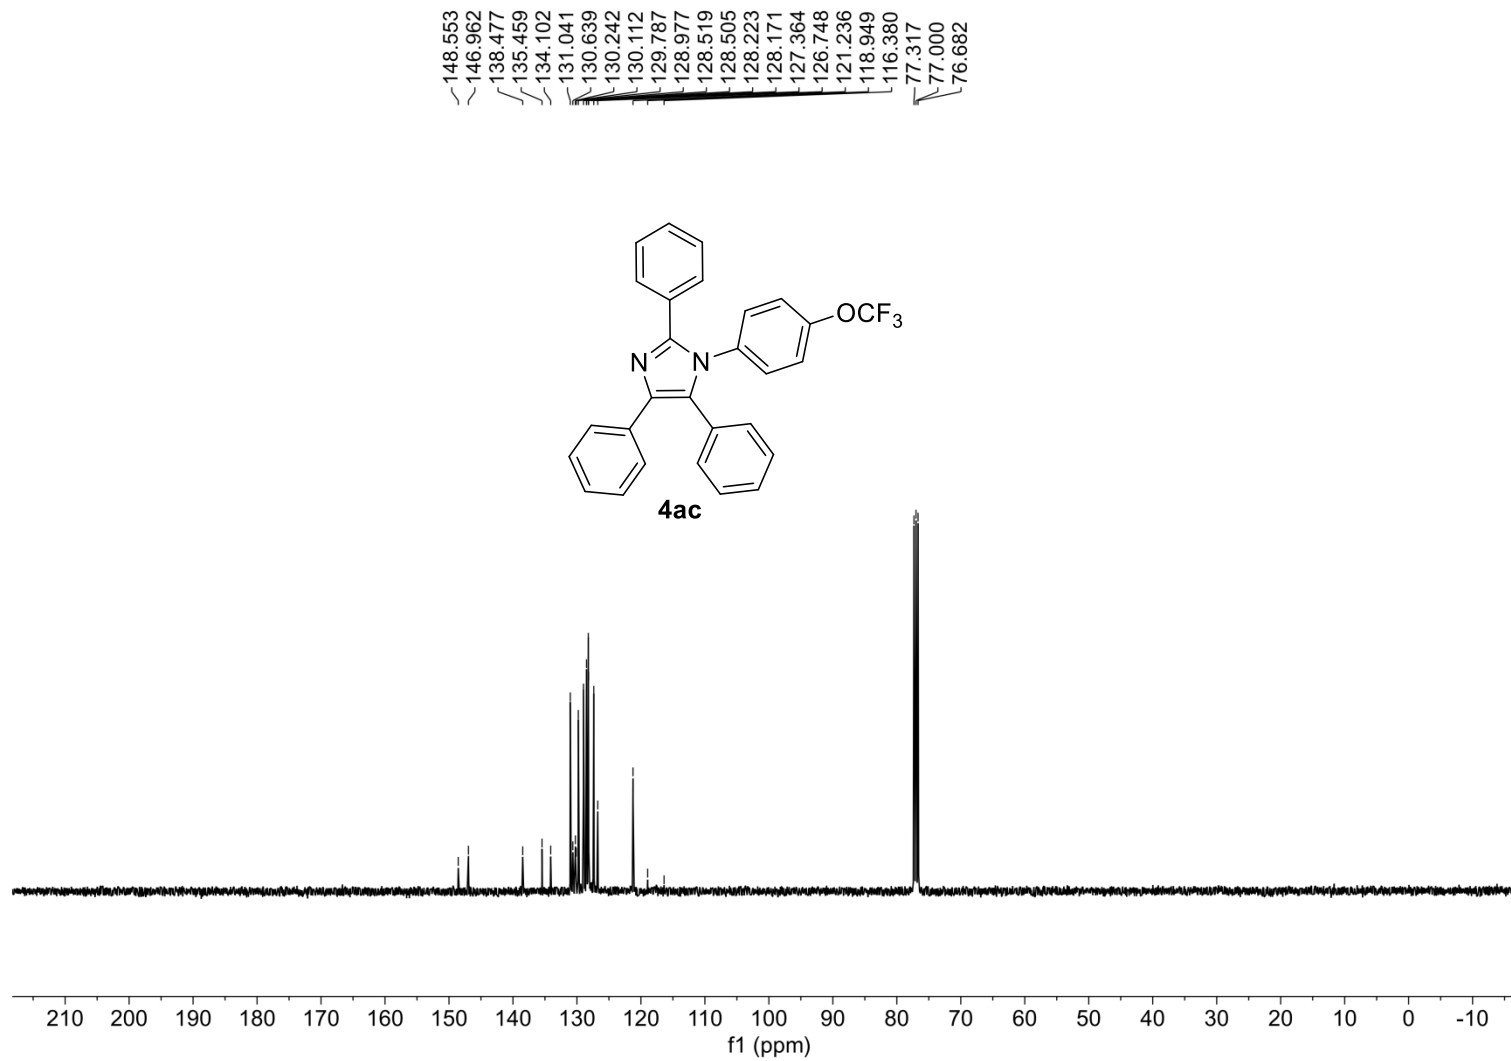

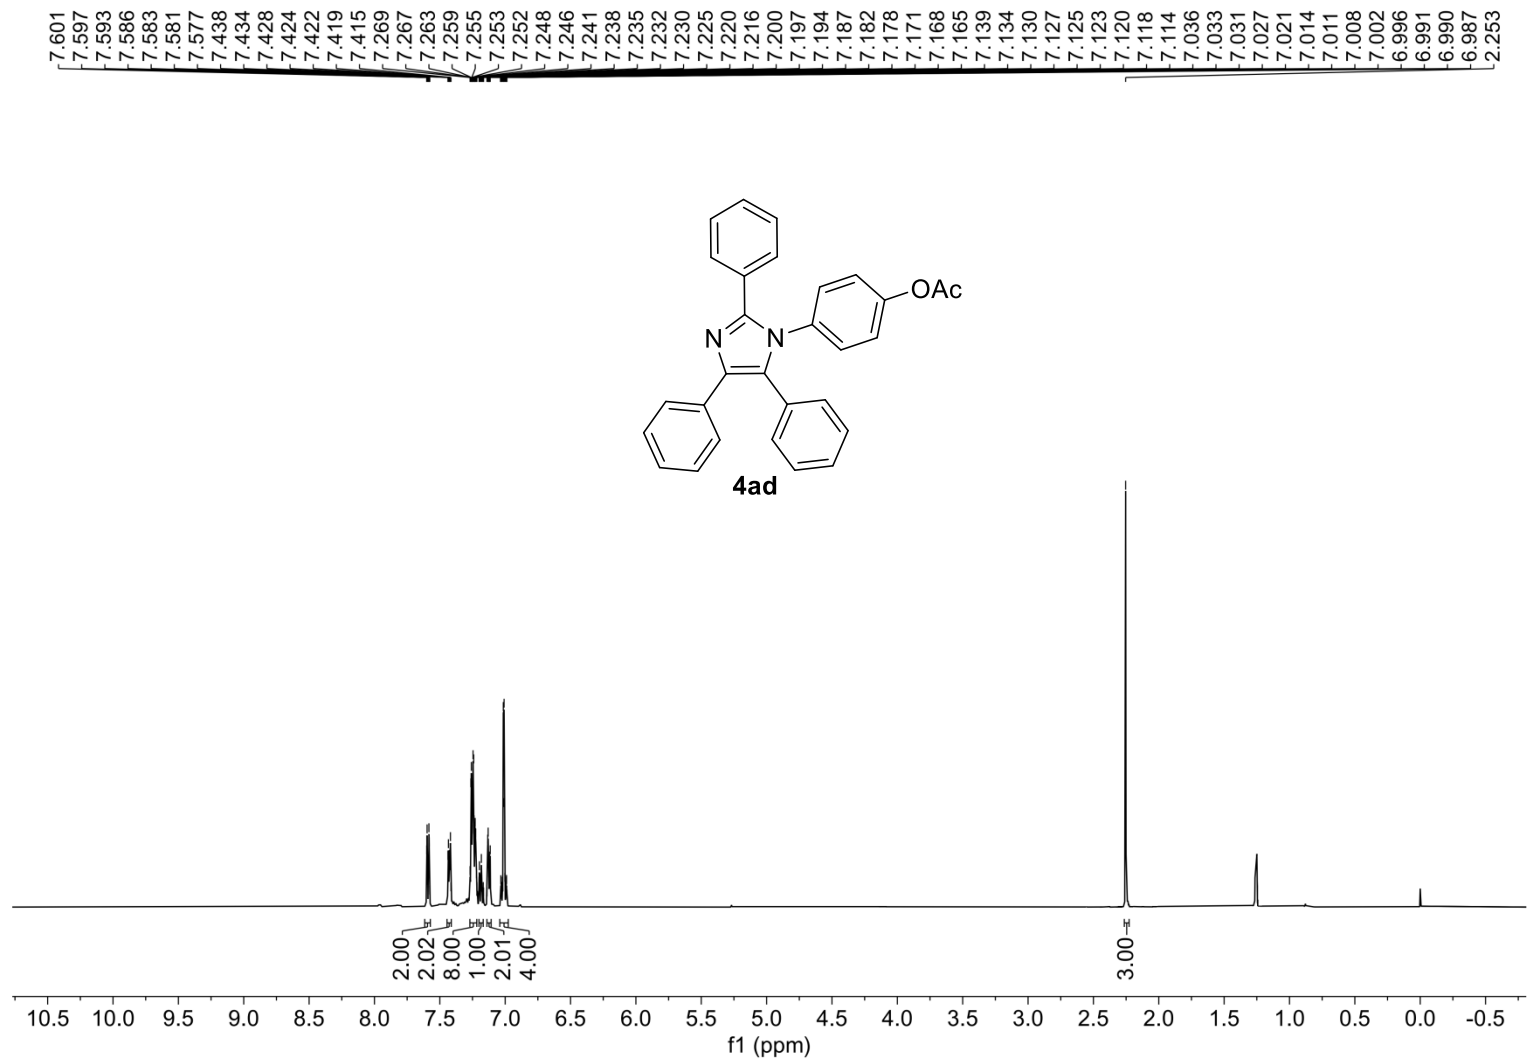

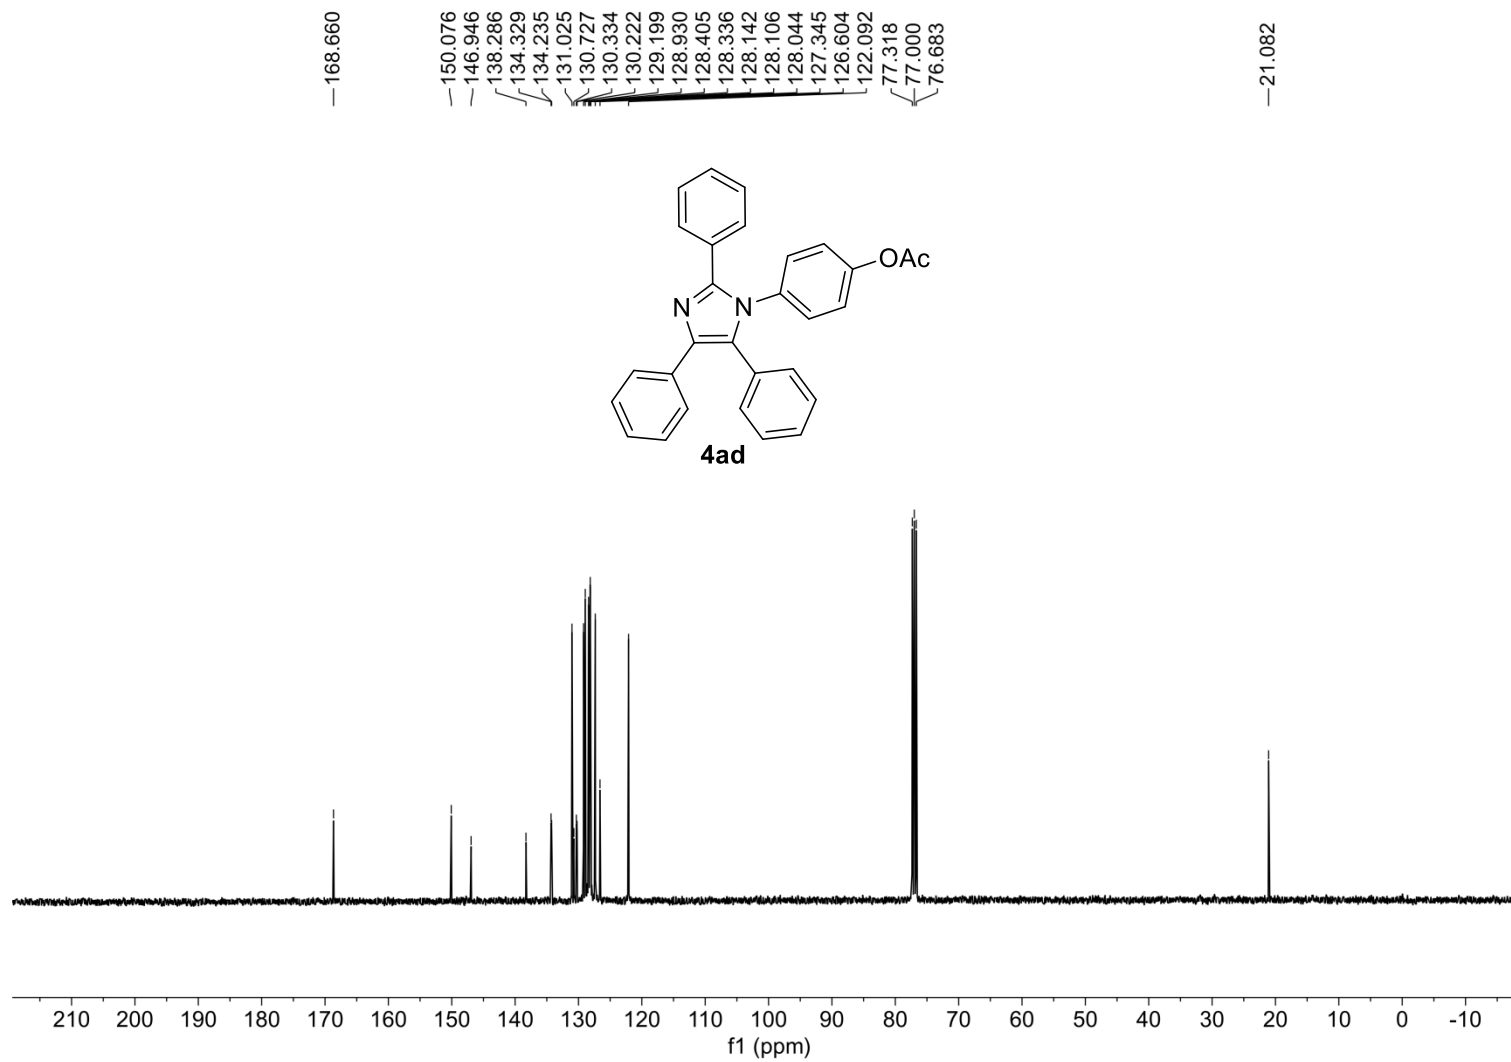

7.588  
7.584  
7.580  
7.574  
7.570  
7.563  
7.428  
7.422  
7.419  
7.414  
7.408  
7.403  
7.379  
7.373  
7.369  
7.360  
7.356  
7.350  
7.297  
7.293  
7.291  
7.281  
7.276  
7.269  
7.265  
7.255  
7.250  
7.242  
7.238  
7.232  
7.226  
7.205  
7.201  
7.198  
7.192  
7.187  
7.182  
7.175  
7.172  
7.131  
7.125  
7.122  
7.119  
7.114  
7.110  
7.106  
6.902  
6.896  
6.892  
6.883  
6.879  
6.873

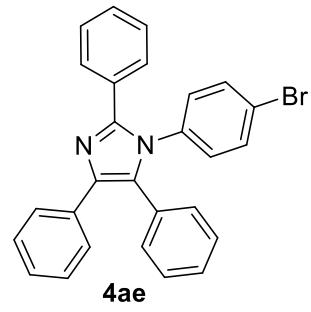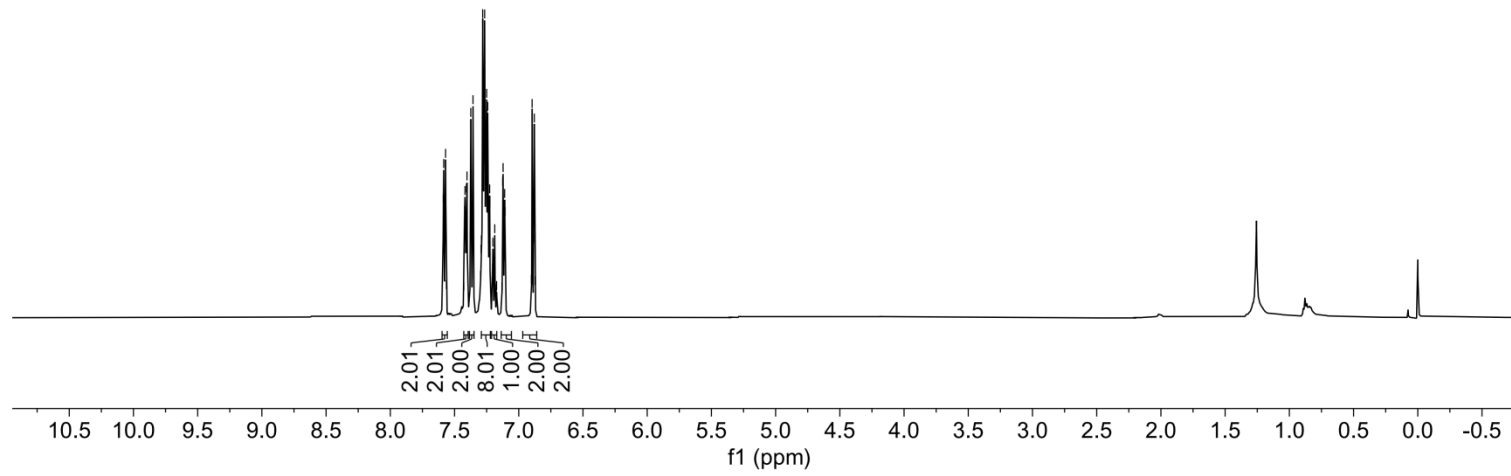

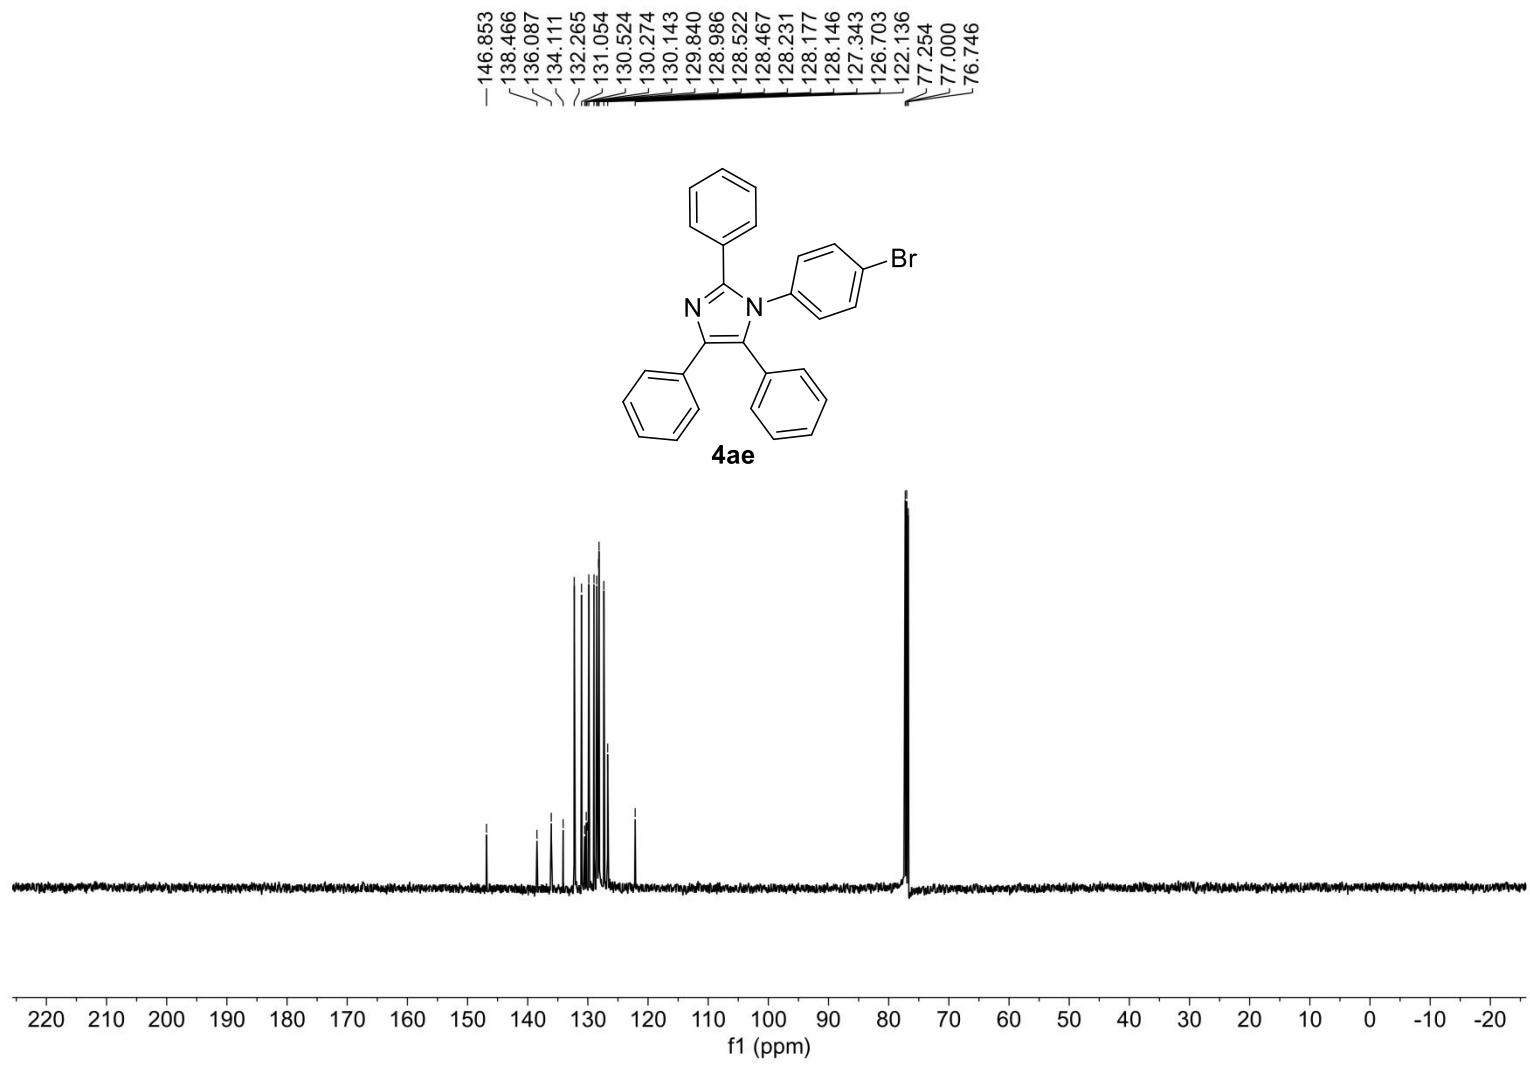



7.595  
7.581  
7.494  
7.477  
7.386  
7.383  
7.371  
7.367  
7.279  
7.269  
7.262  
7.248  
7.236  
7.233  
7.221  
7.215  
7.212  
7.197  
7.187  
7.182  
7.176  
7.168  
7.119  
7.111  
7.102  
7.097  
7.094

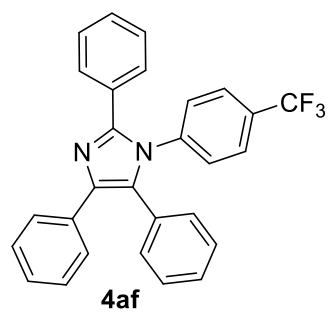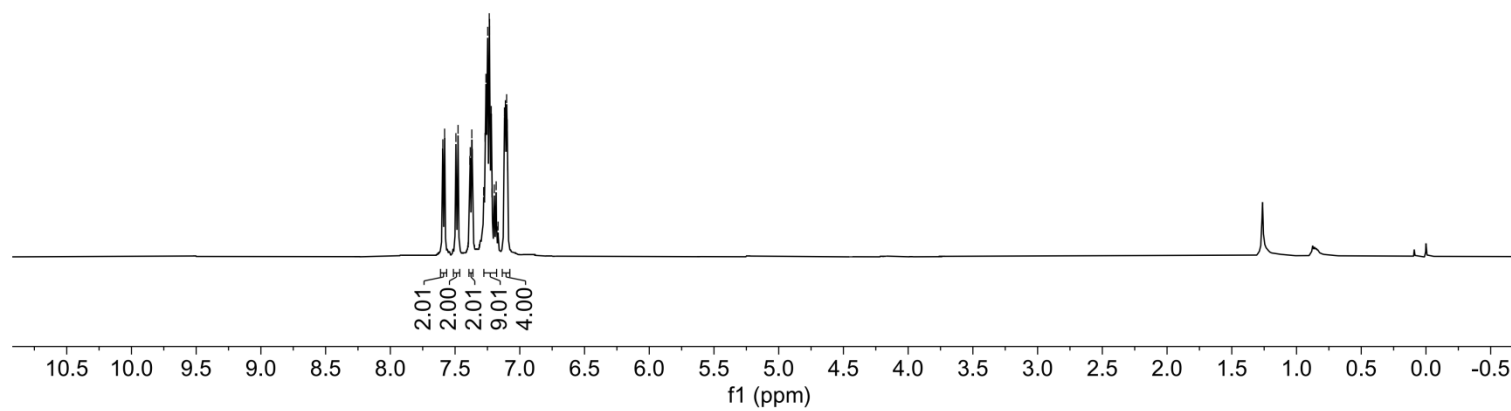

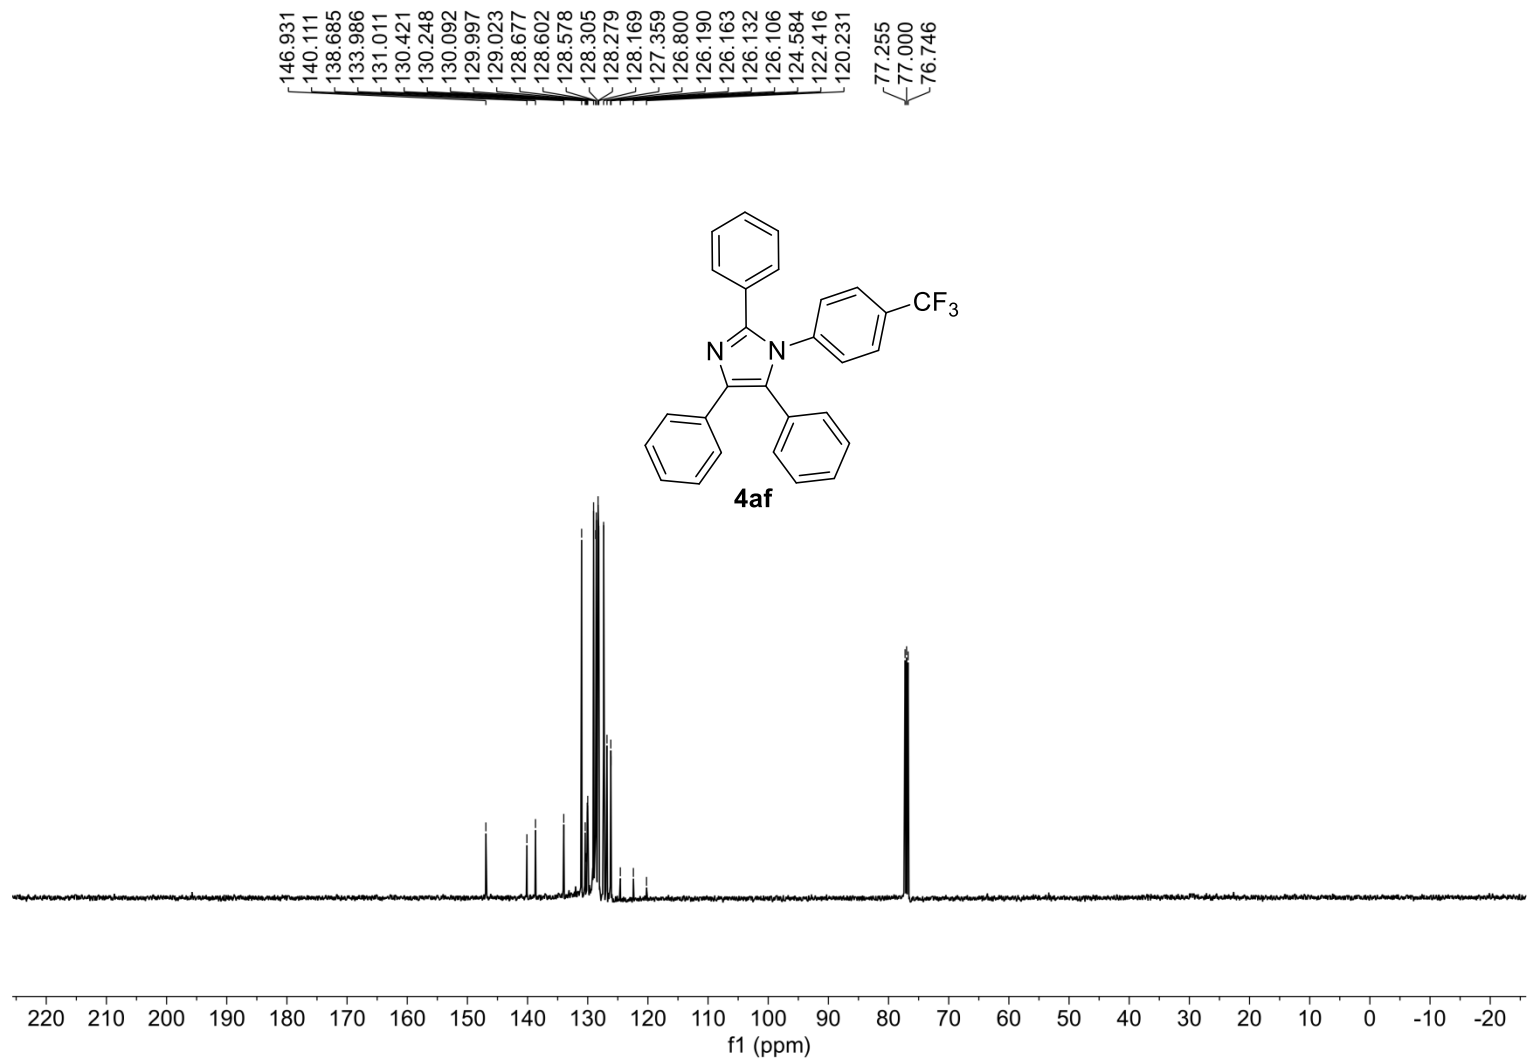

7.584  
7.581  
7.576  
7.570  
7.567  
7.564  
7.560  
7.538  
7.533  
7.524  
7.521  
7.516  
7.372  
7.369  
7.356  
7.352  
7.338  
7.336  
7.328  
7.324  
7.321  
7.316  
7.310  
7.307  
7.304  
7.299  
7.295  
7.283  
7.280  
7.271  
7.268  
7.257  
7.254  
7.250  
7.241  
7.239  
7.224  
7.221  
7.218  
7.211  
7.207  
7.201  
7.195  
7.192  
7.189  
7.110  
7.105  
7.096  
7.092

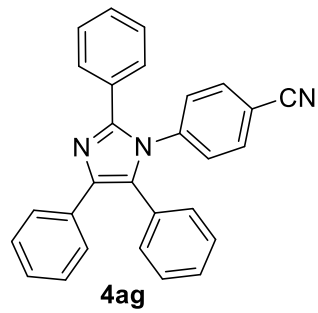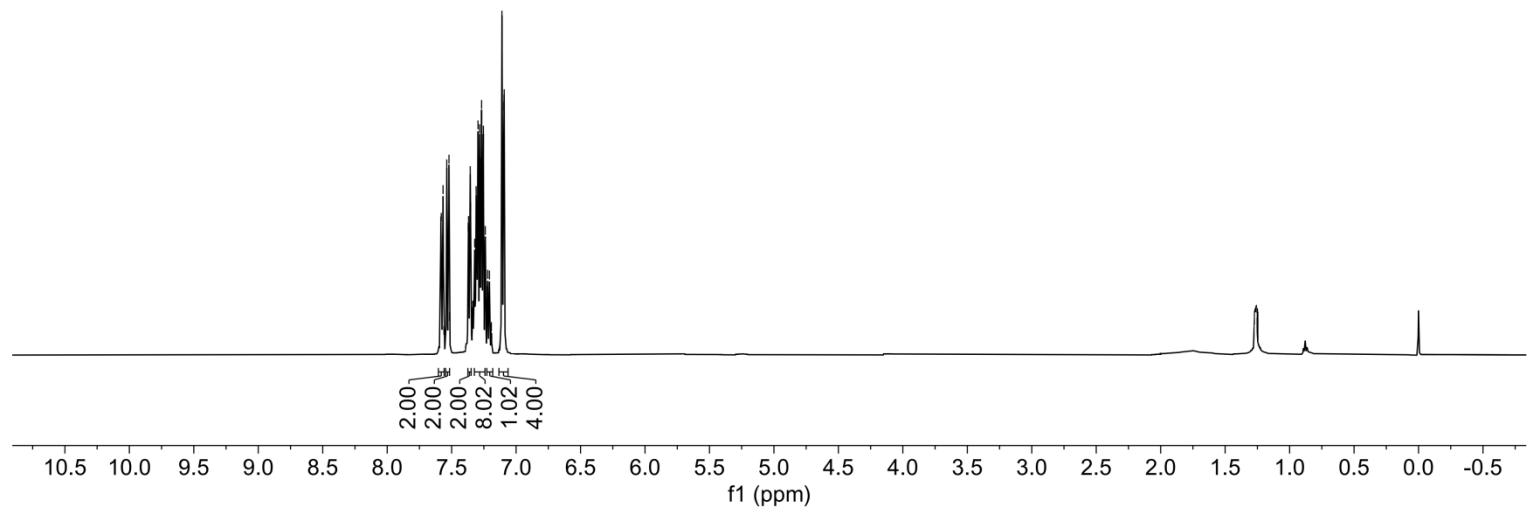

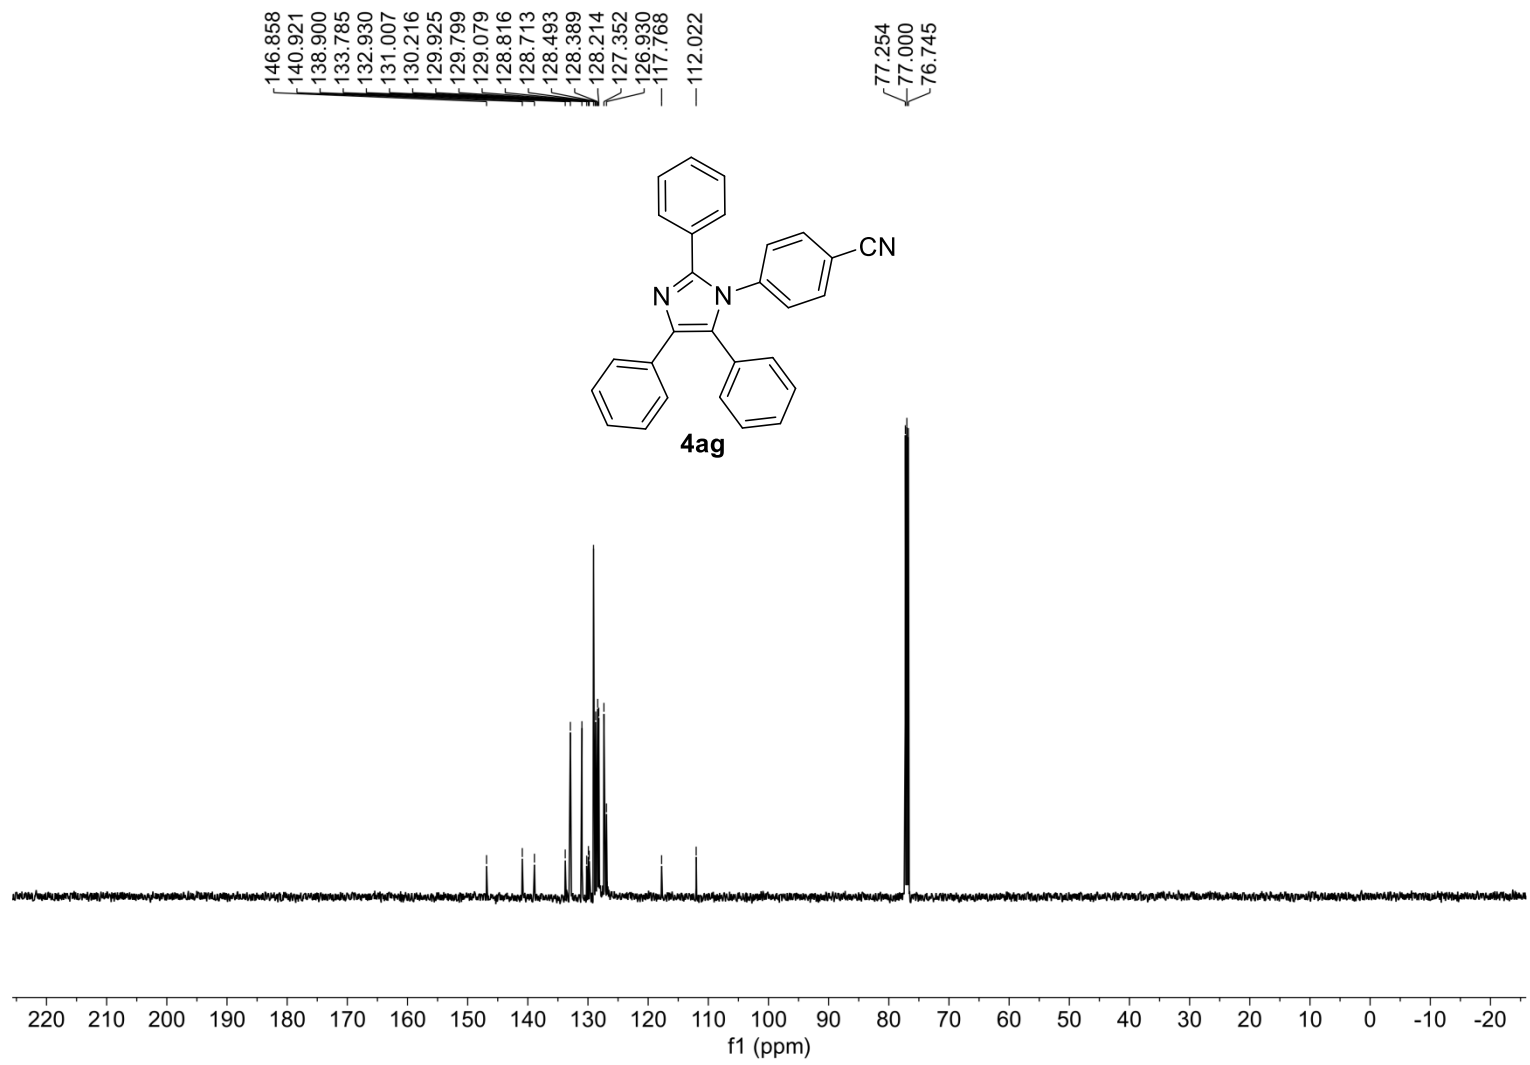

S100

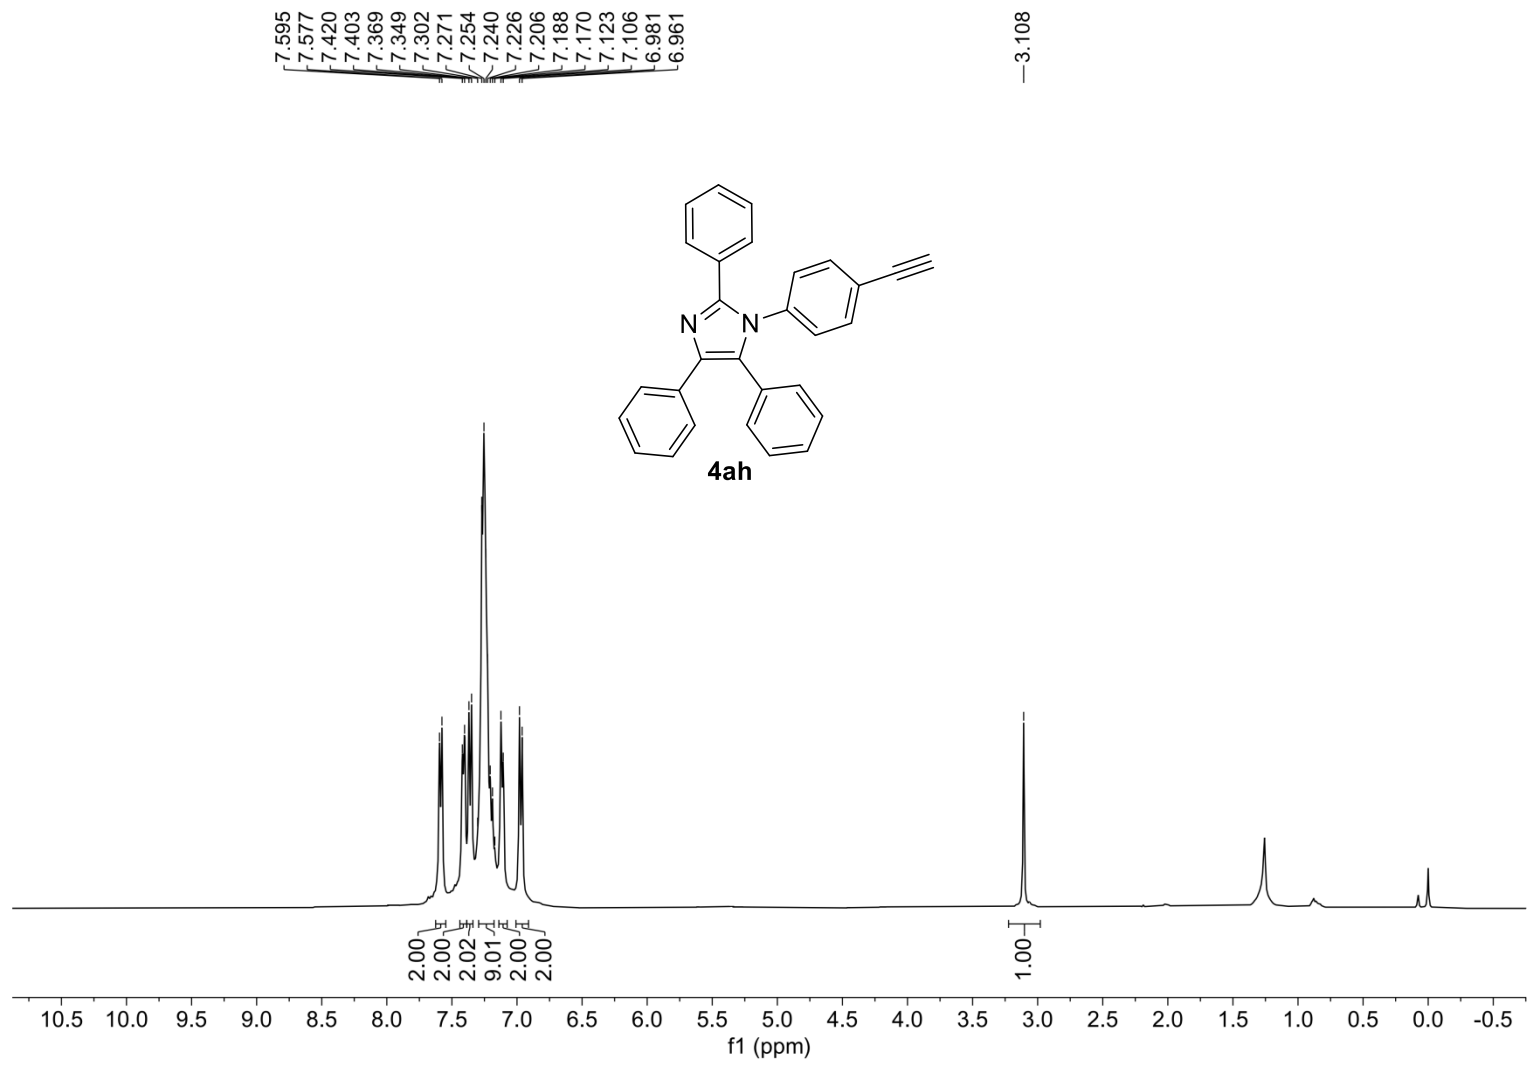

S101

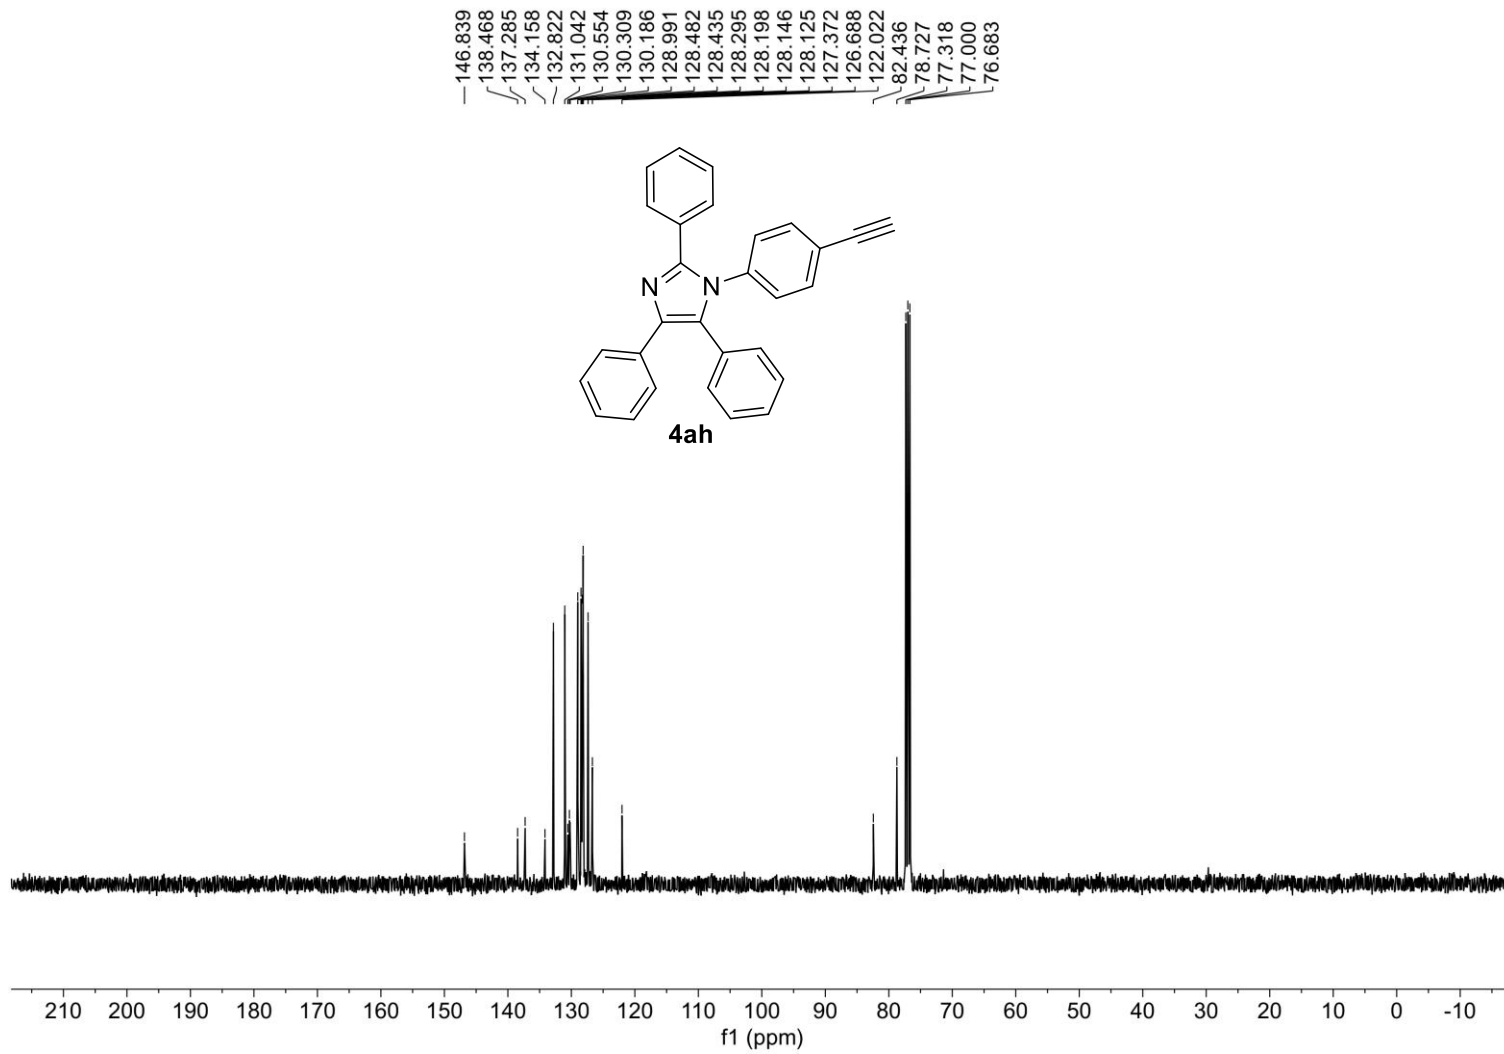

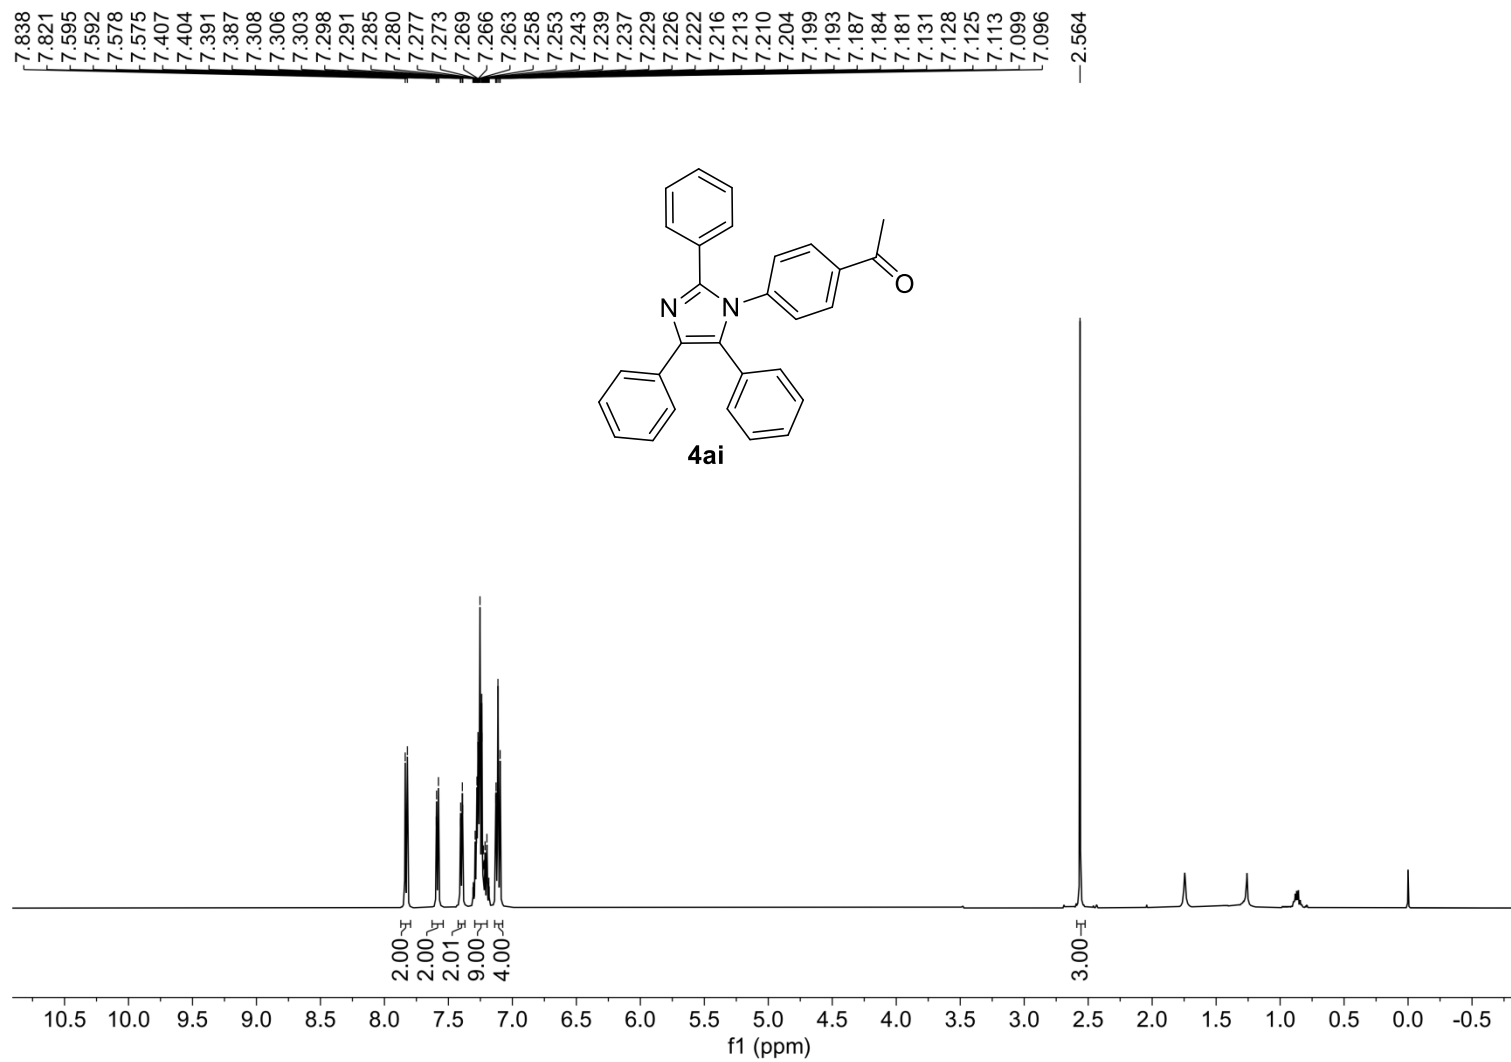

S103

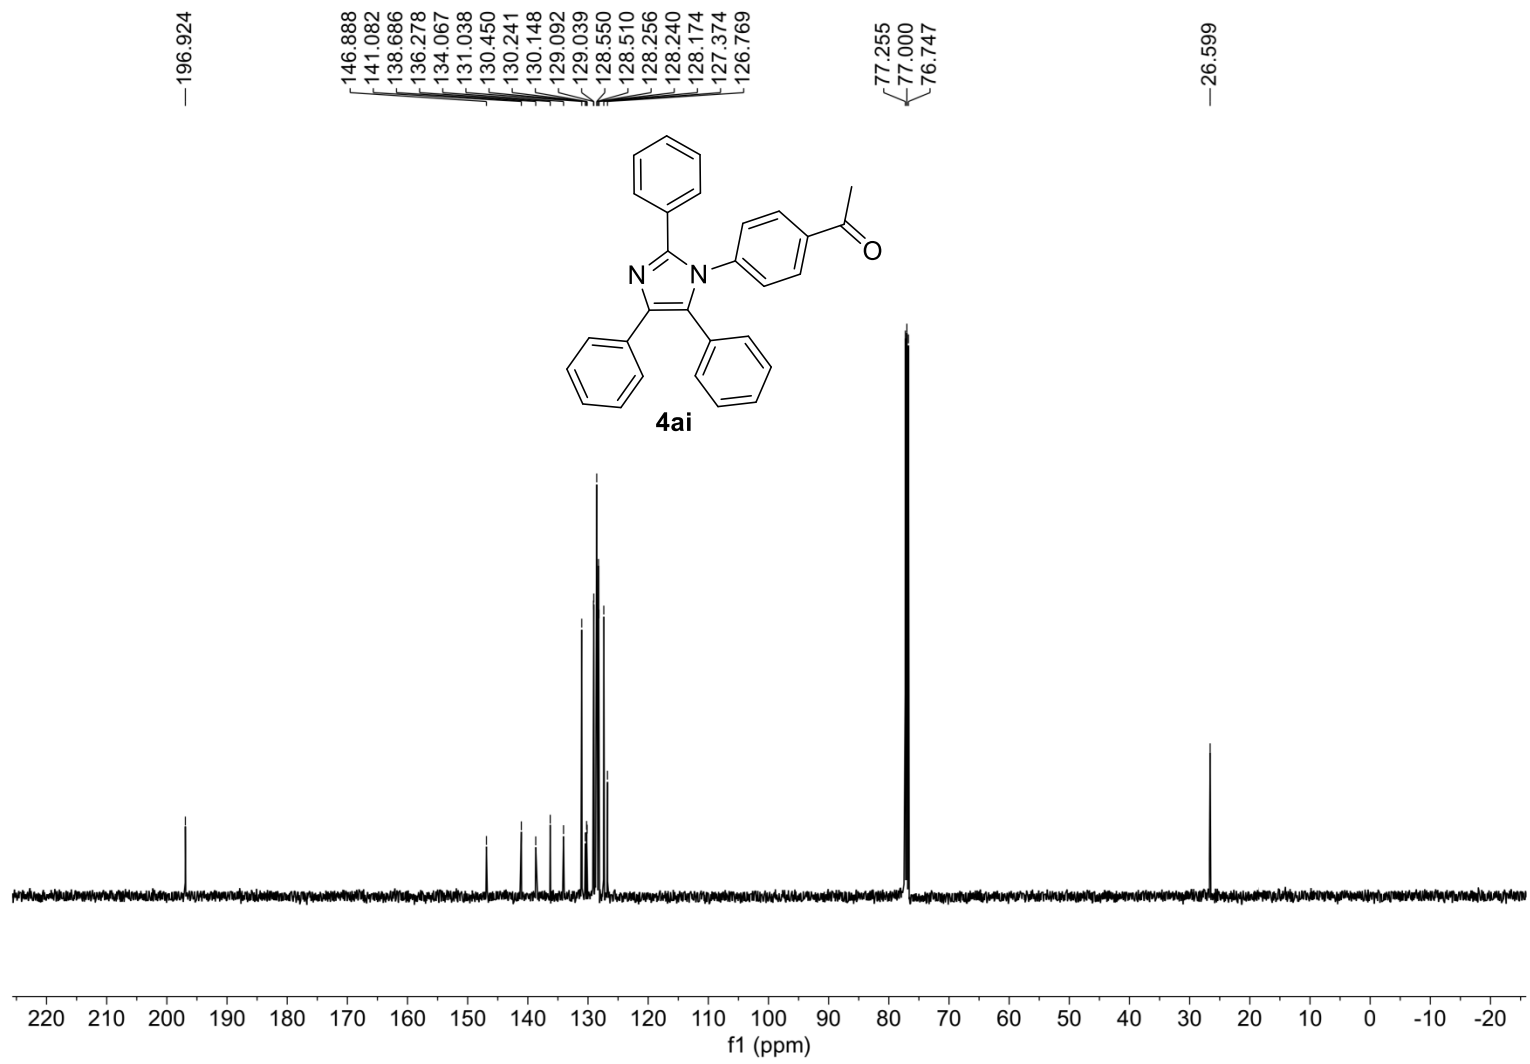

S104



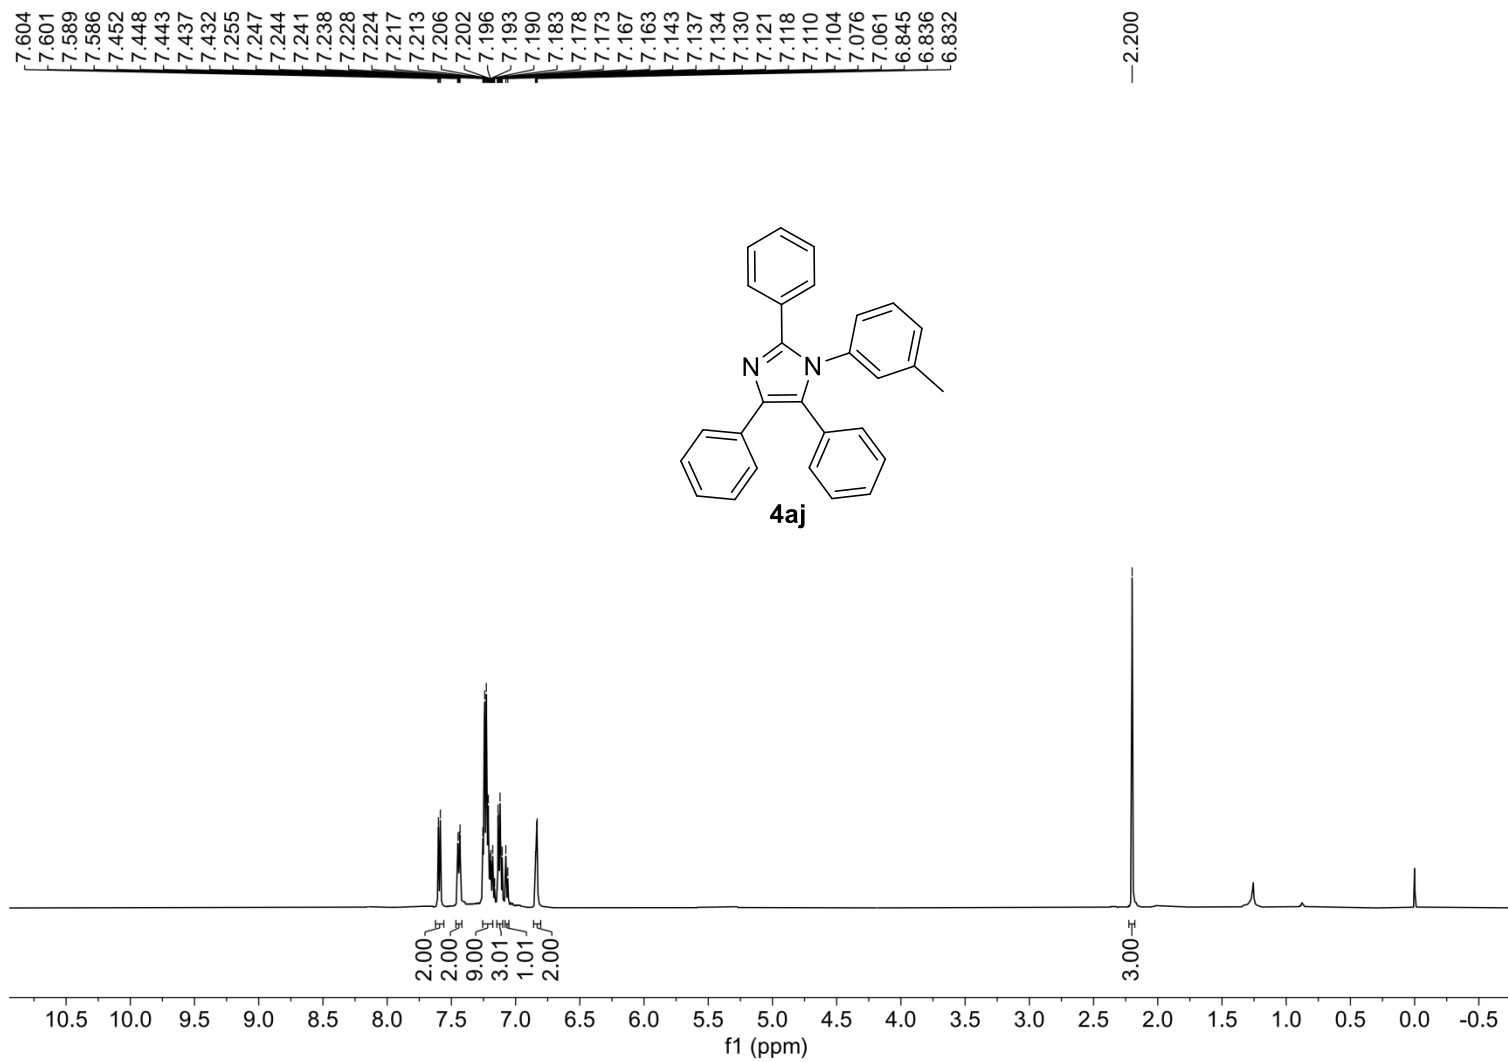

S105

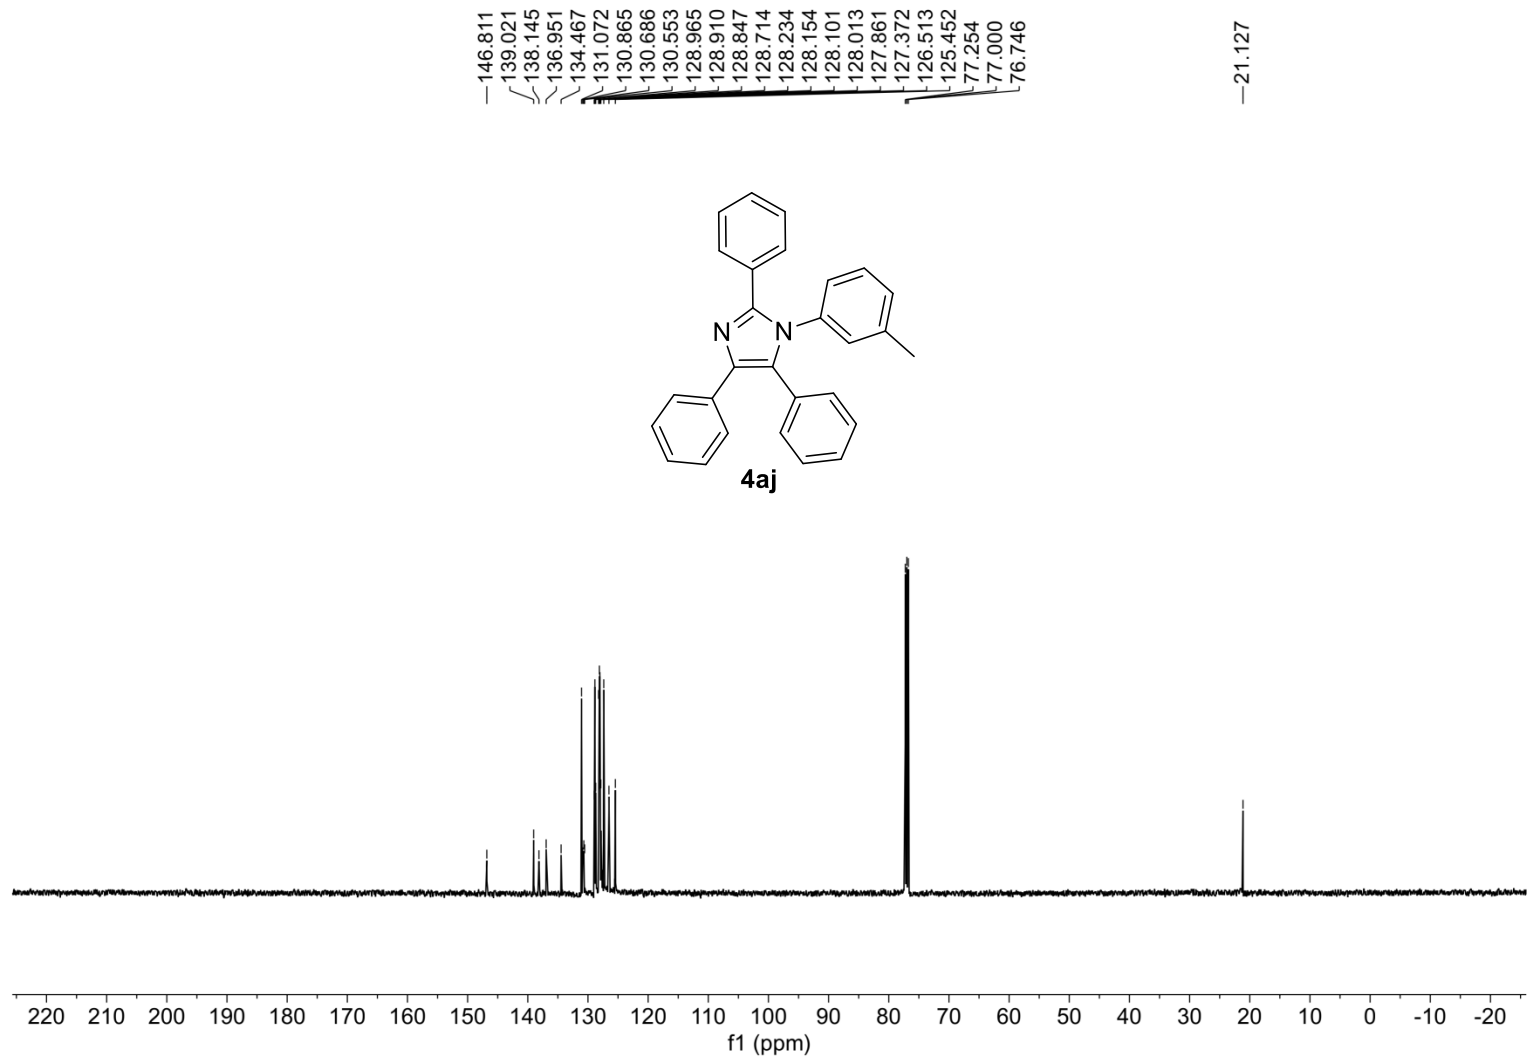

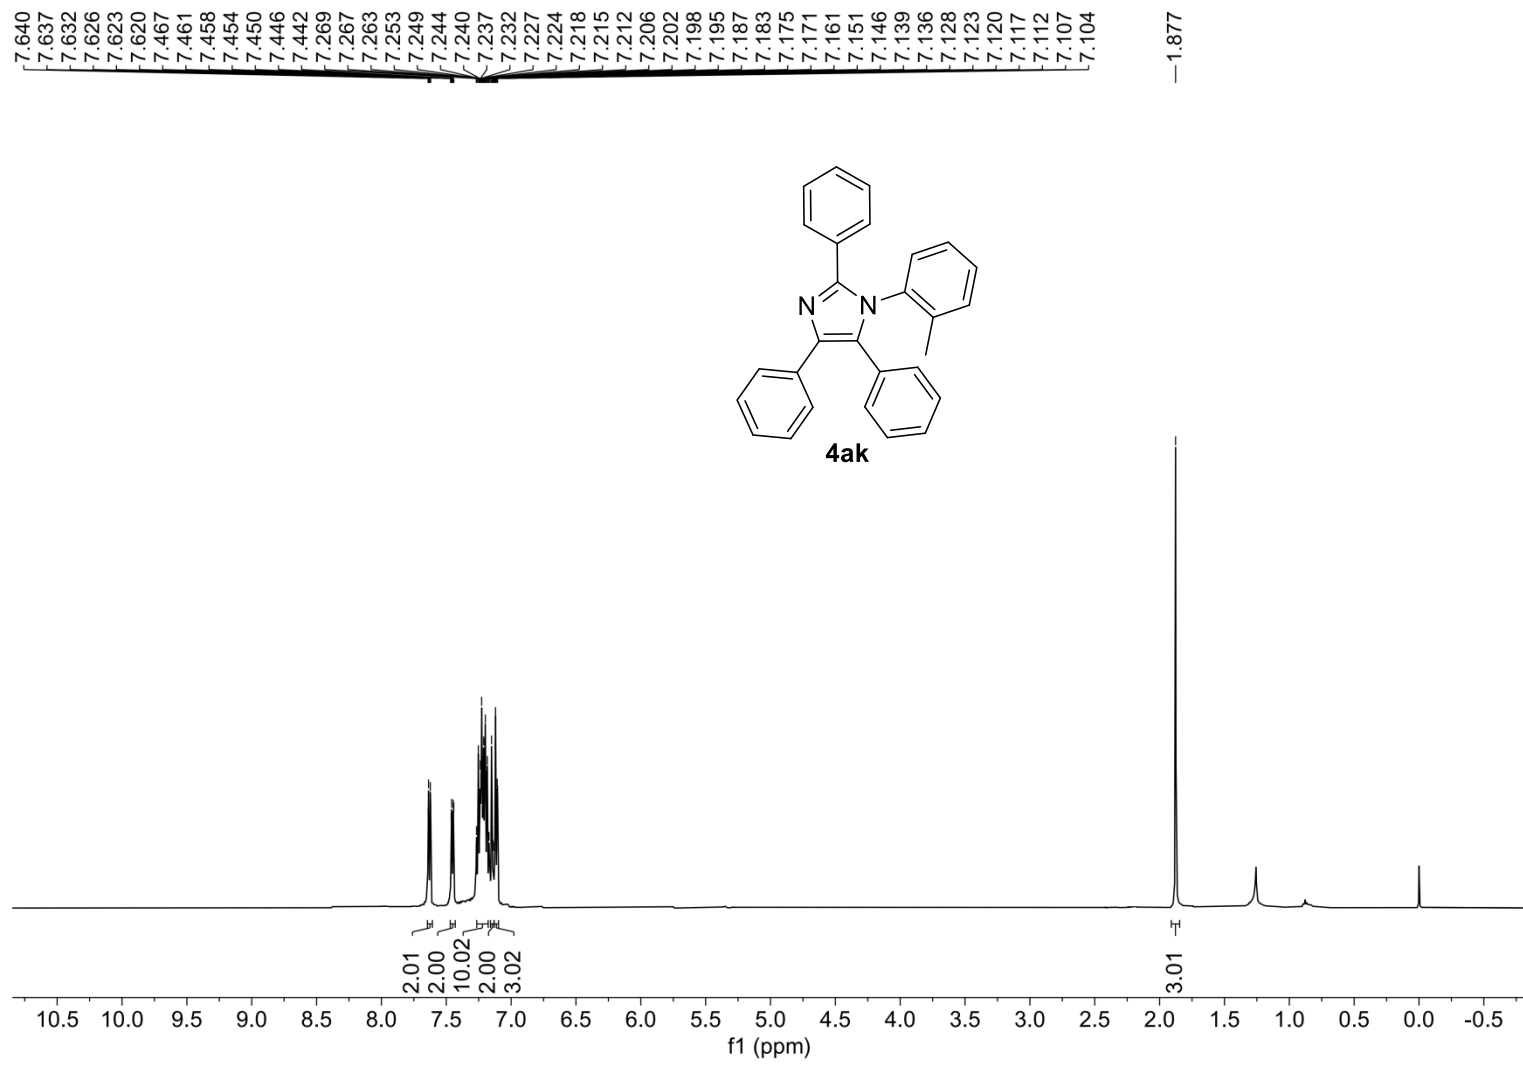

S107

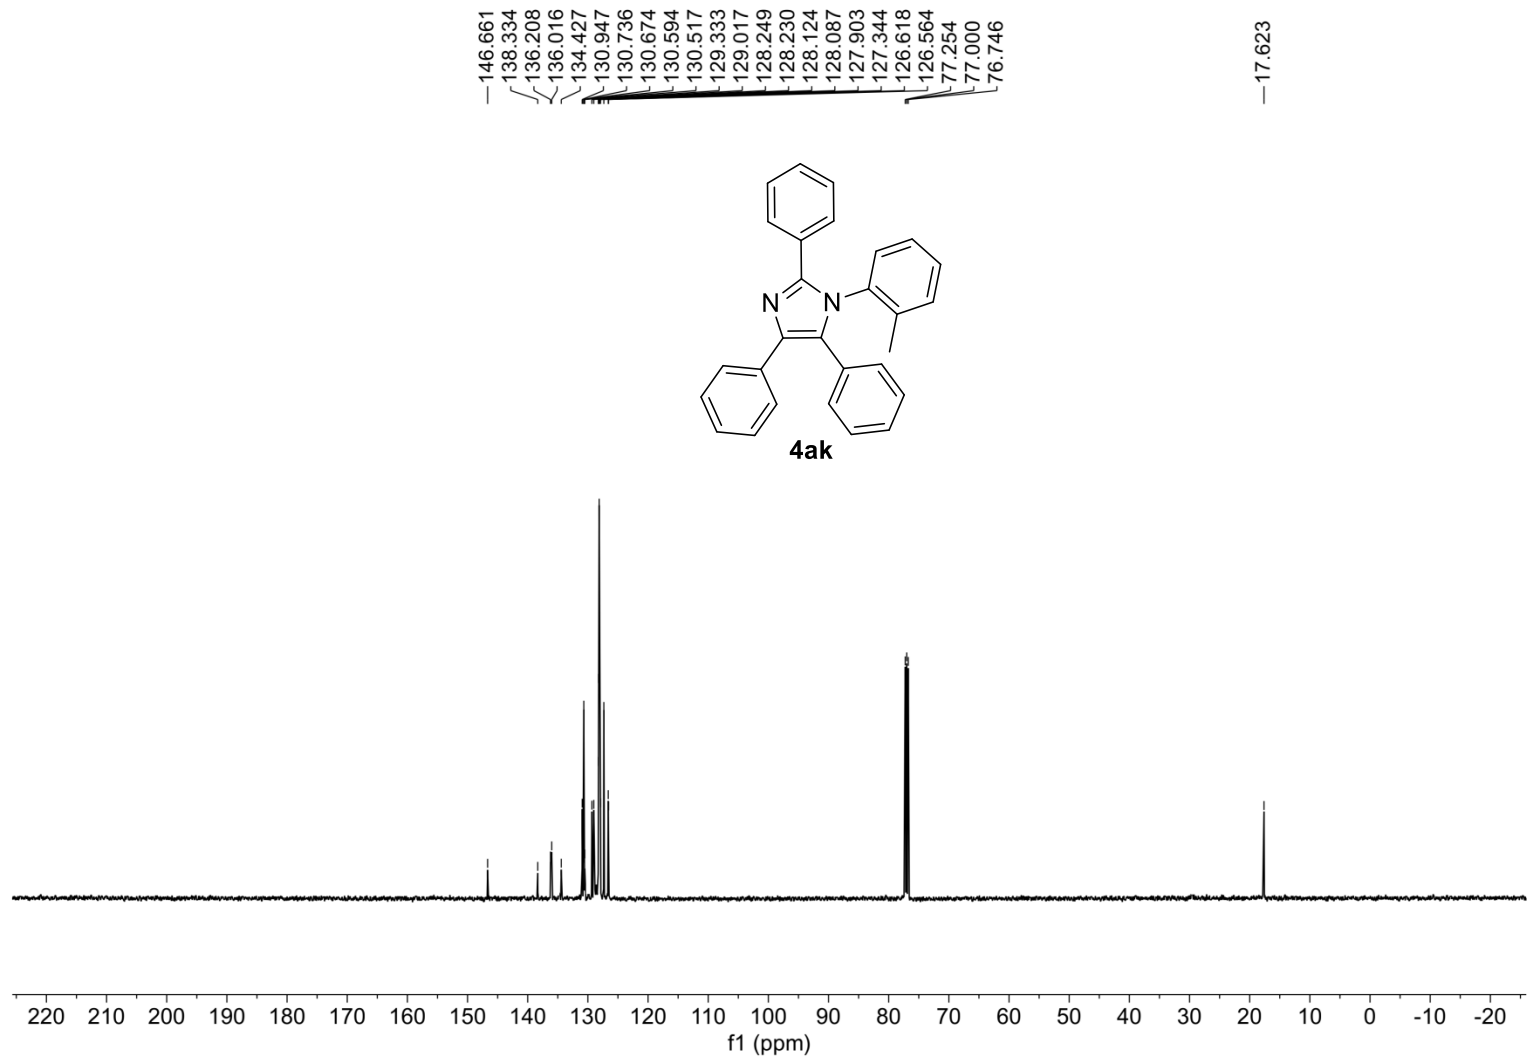

7.643  
7.624  
7.479  
7.464  
7.458  
7.345  
7.340  
7.325  
7.315  
7.308  
7.271  
7.257  
7.251  
7.236  
7.217  
7.204  
7.199  
7.186  
7.179  
7.167

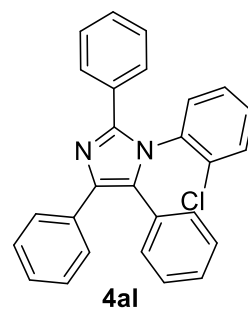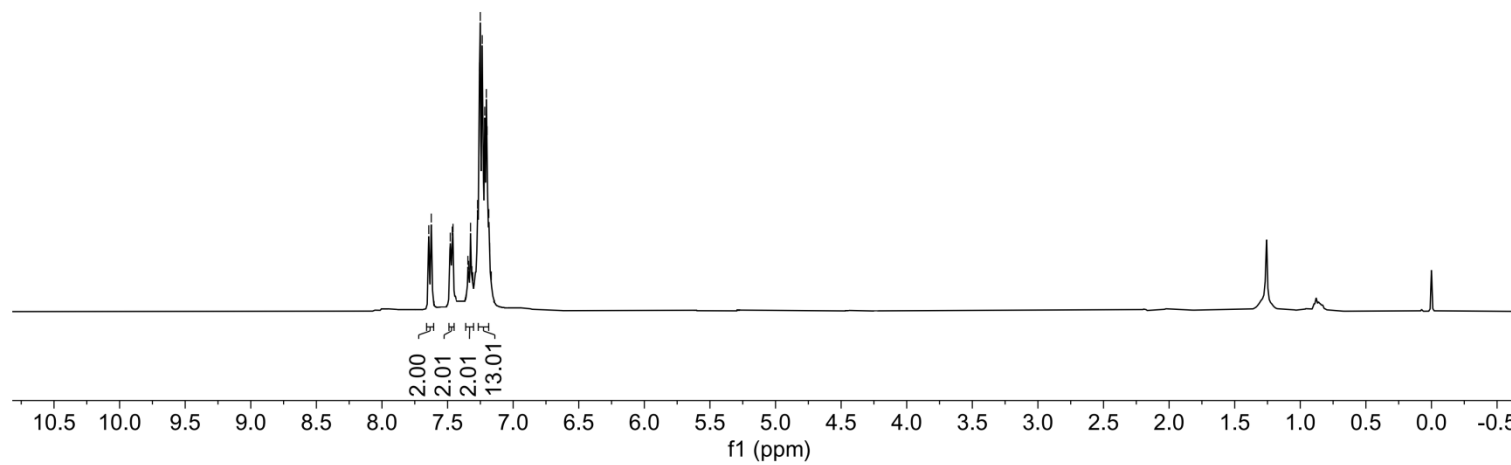

S109

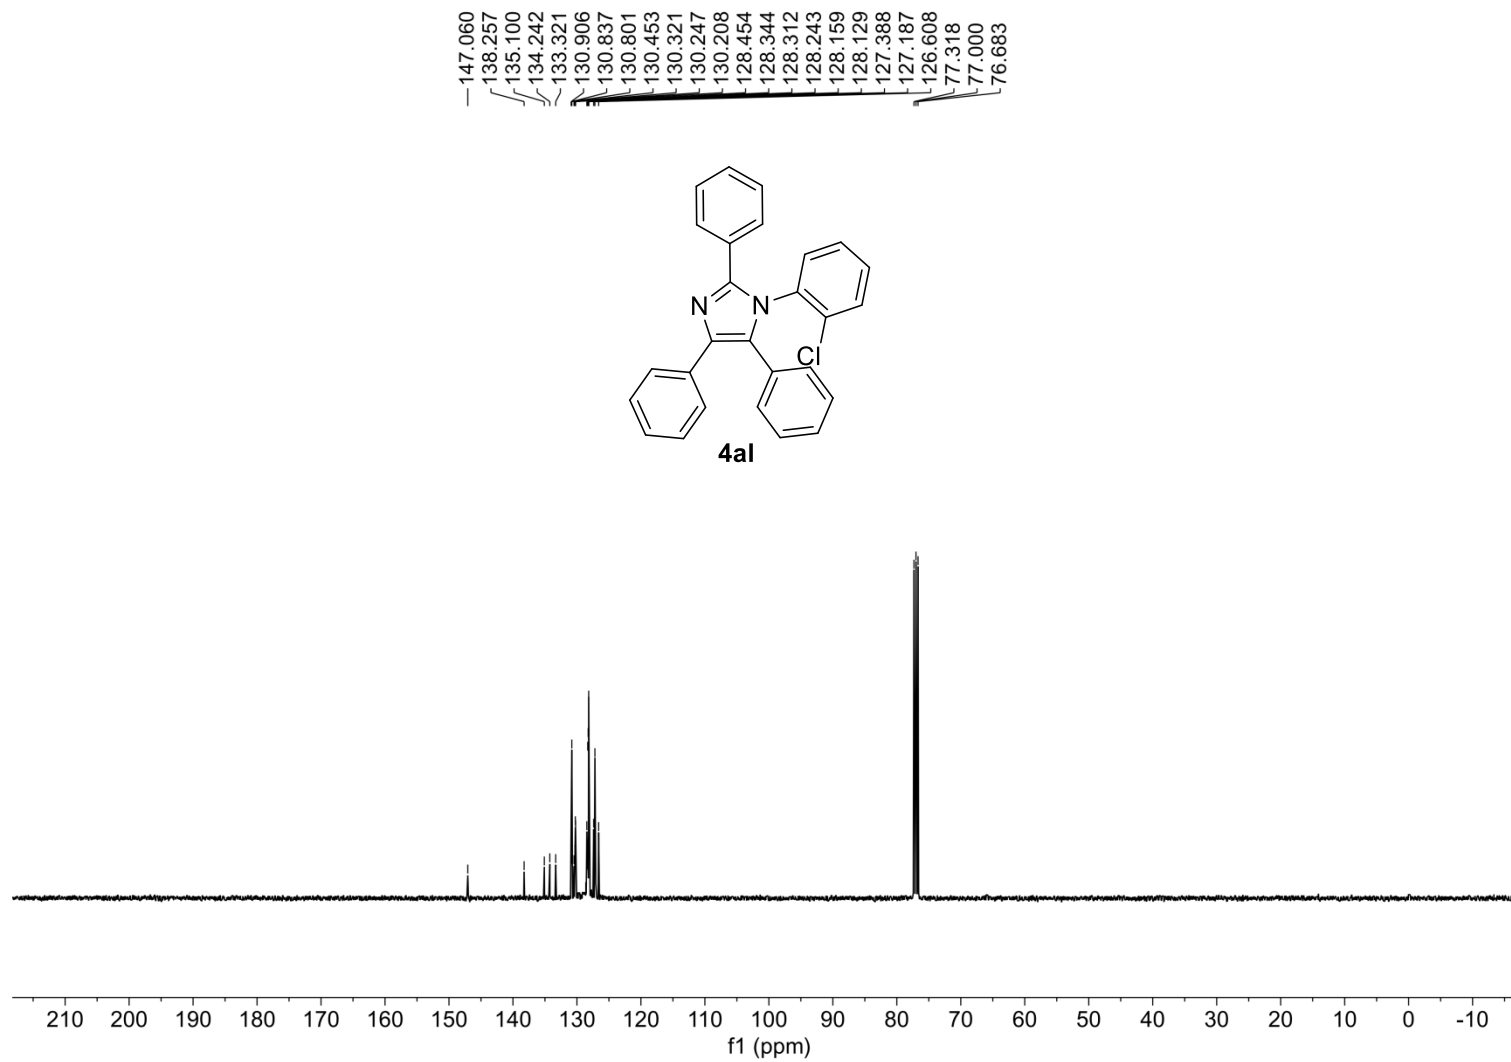

S110

8.404  
7.607  
7.602  
7.589  
7.585  
7.582  
7.402  
7.398  
7.394  
7.382  
7.377  
7.283  
7.280  
7.275  
7.265  
7.262  
7.257  
7.248  
7.244  
7.239  
7.232  
7.229  
7.225  
7.218  
7.203  
7.198  
7.186  
7.181  
7.176  
7.164  
7.147  
7.142  
7.099  
7.095  
7.091  
7.079  
7.074  
7.038  
7.033  
7.021  
7.017  
2.599  
2.592  
2.563  
2.265  
2.259  
2.247  
2.241  
2.229  
2.223  
2.211  
2.204  
2.197  
2.188  
2.179  
2.166  
1.988  
1.970  
1.952  
1.923  
1.905  
1.888  
0.831  
0.812  
0.794

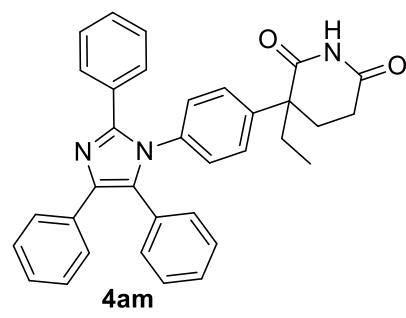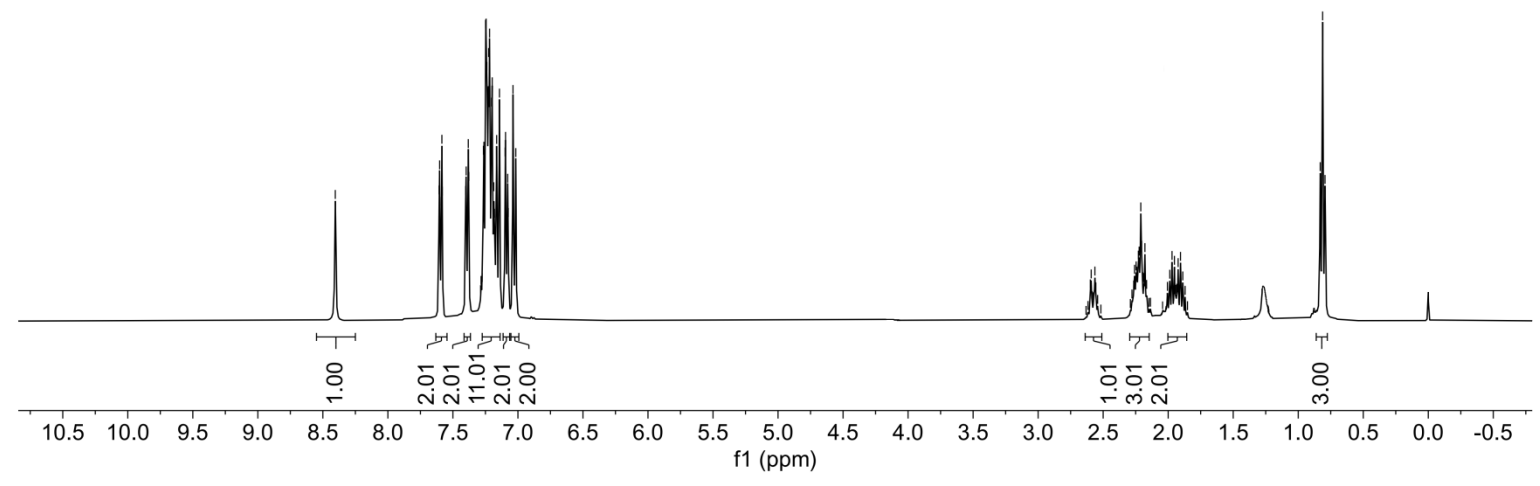

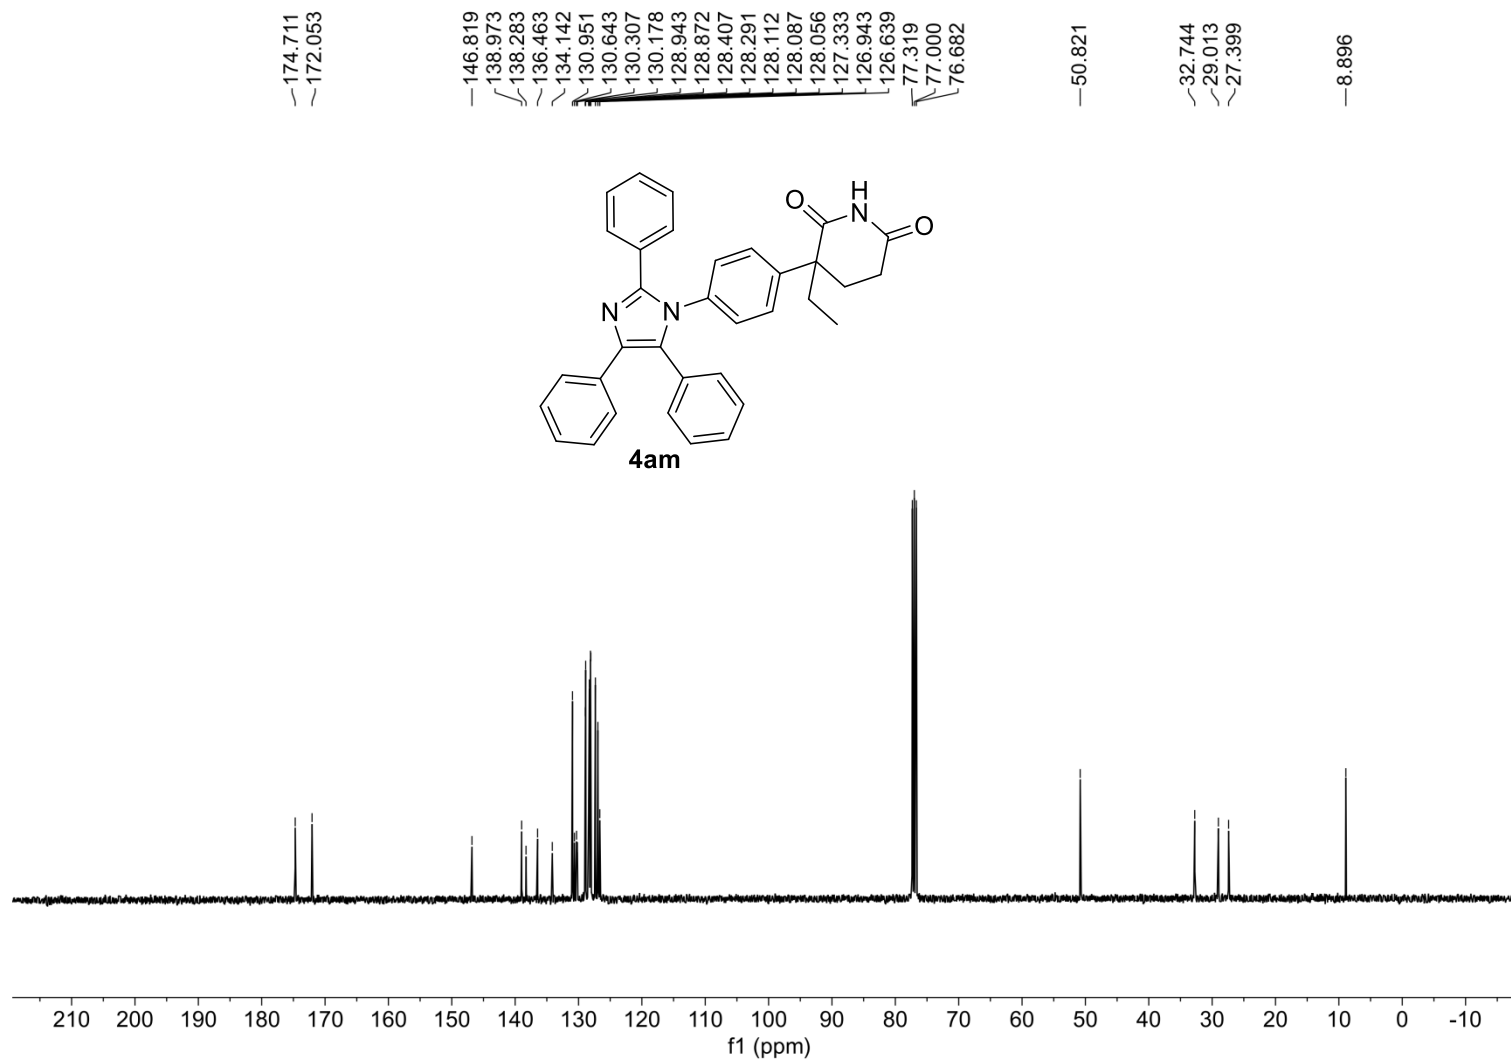



7.671  
7.663  
7.660  
7.652  
7.646  
7.637  
7.591  
7.587  
7.582  
7.574  
7.570  
7.567  
7.561  
7.414  
7.404  
7.400  
7.392  
7.387  
7.376  
7.357  
7.350  
7.344  
7.340  
7.333  
7.328  
7.319  
7.314  
7.302  
7.298  
7.292  
7.244  
7.232  
7.228  
7.224  
7.211  
7.205  
7.200  
7.192  
7.188  
7.177  
7.164  
7.161  
7.157  
7.148  
7.143  
7.136  
7.128  
7.124  
7.121  
6.814  
6.805  
6.796  
6.791  
5.113

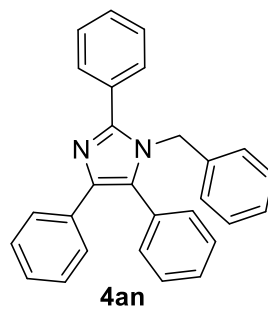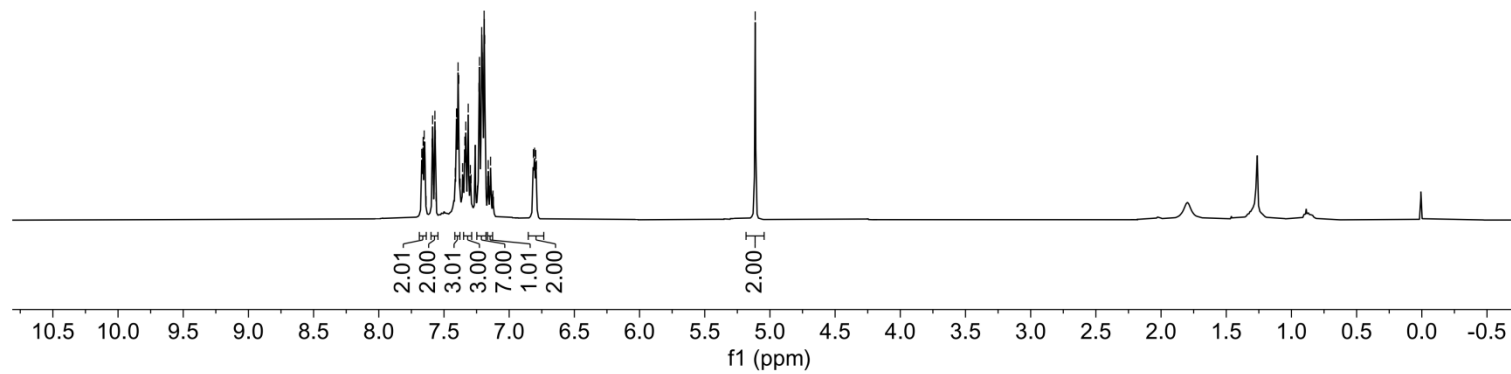

S113

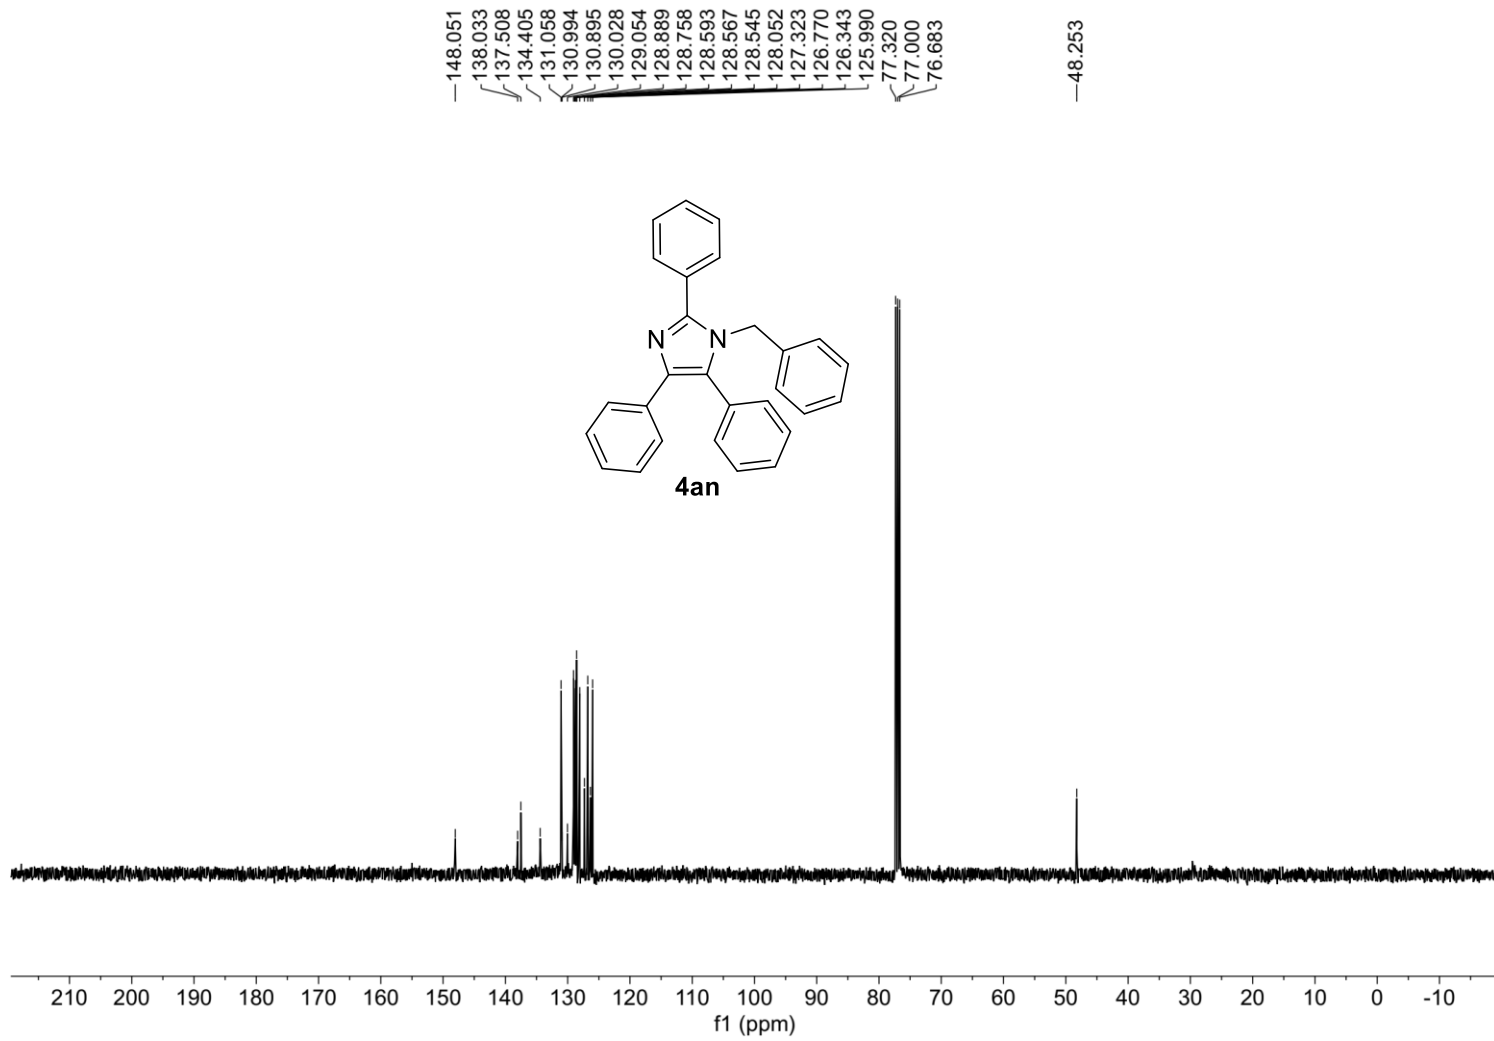

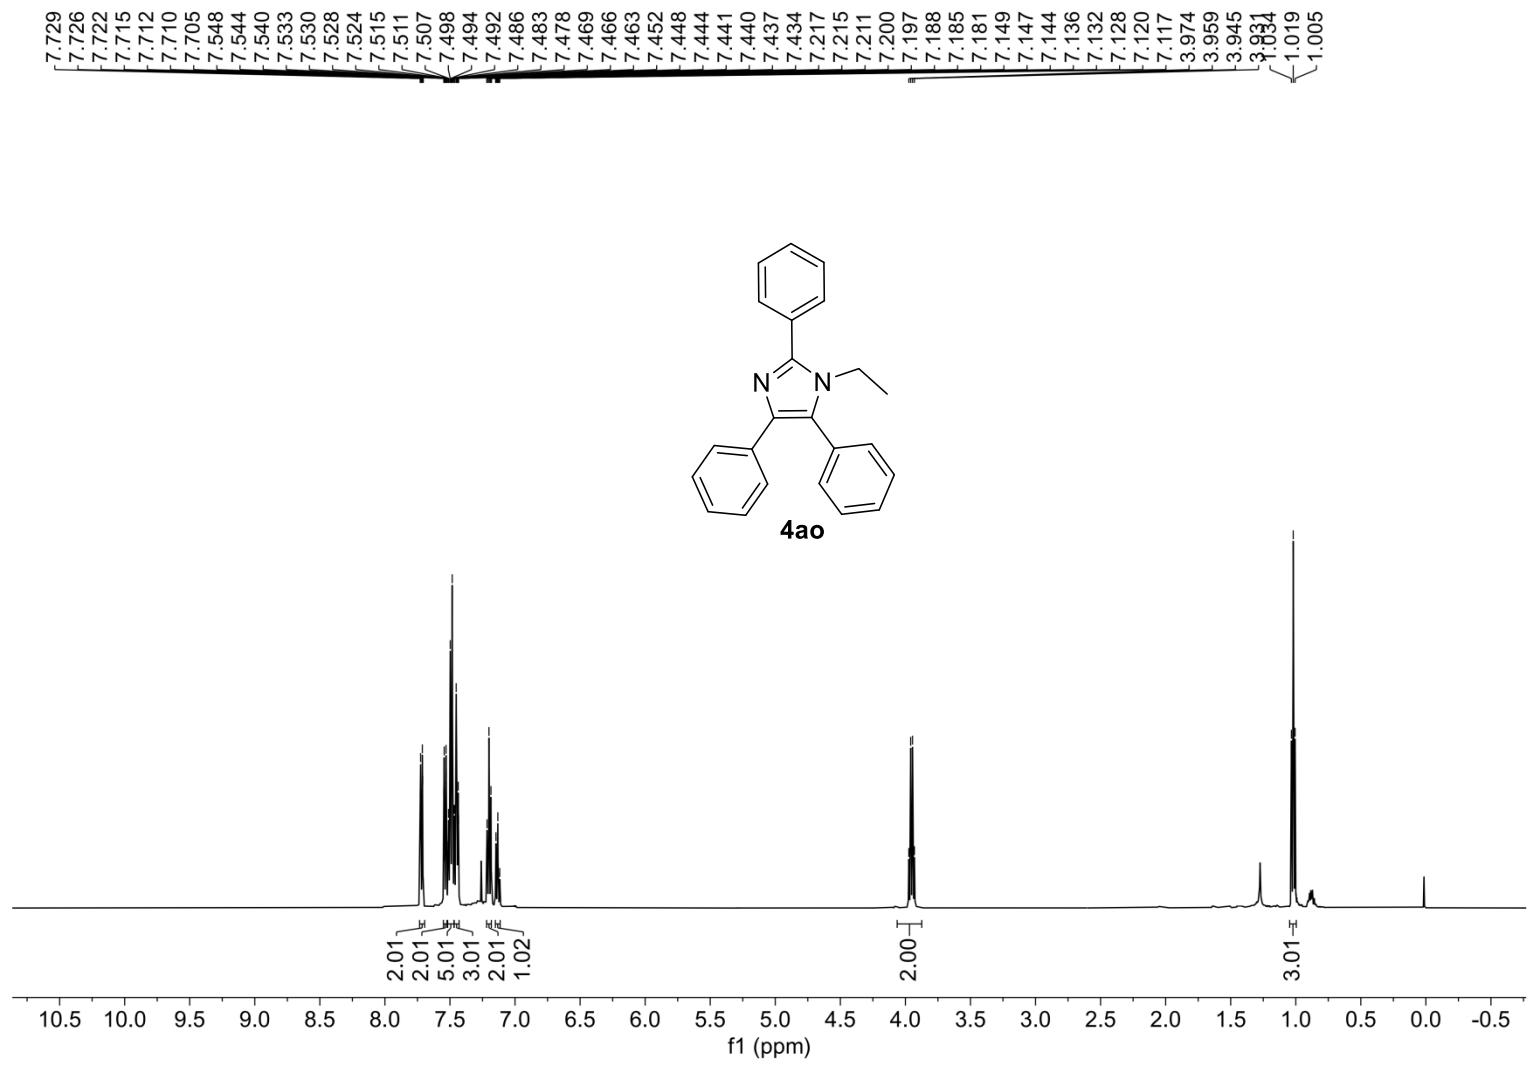

S115

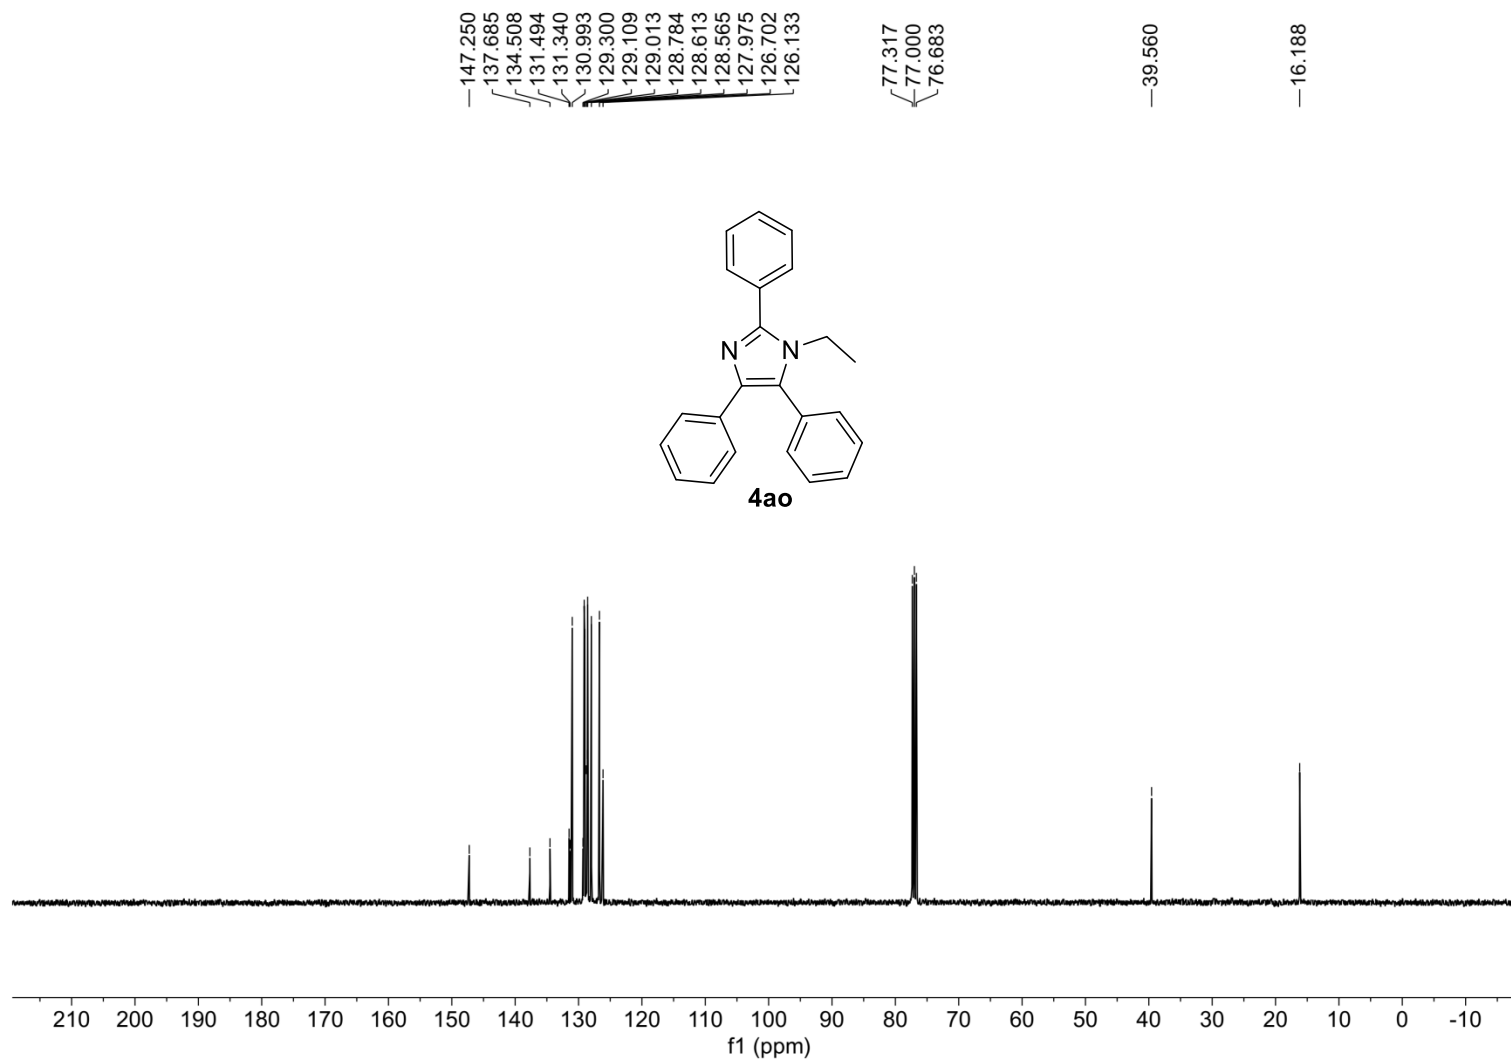

S116

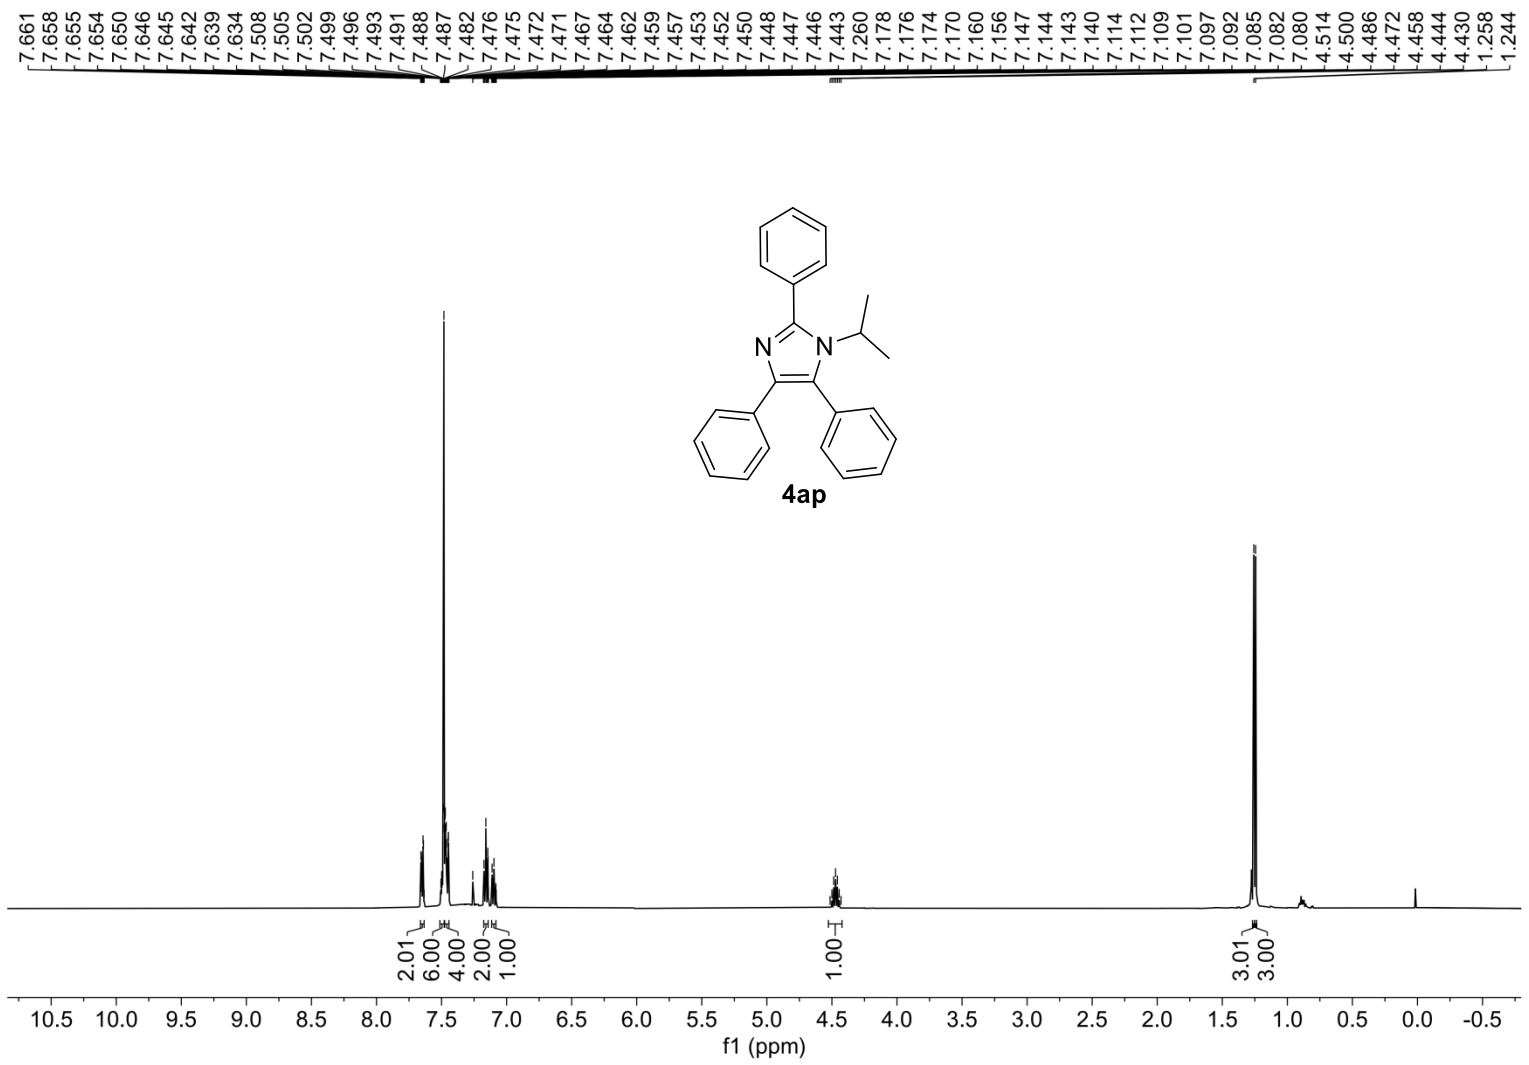

S117

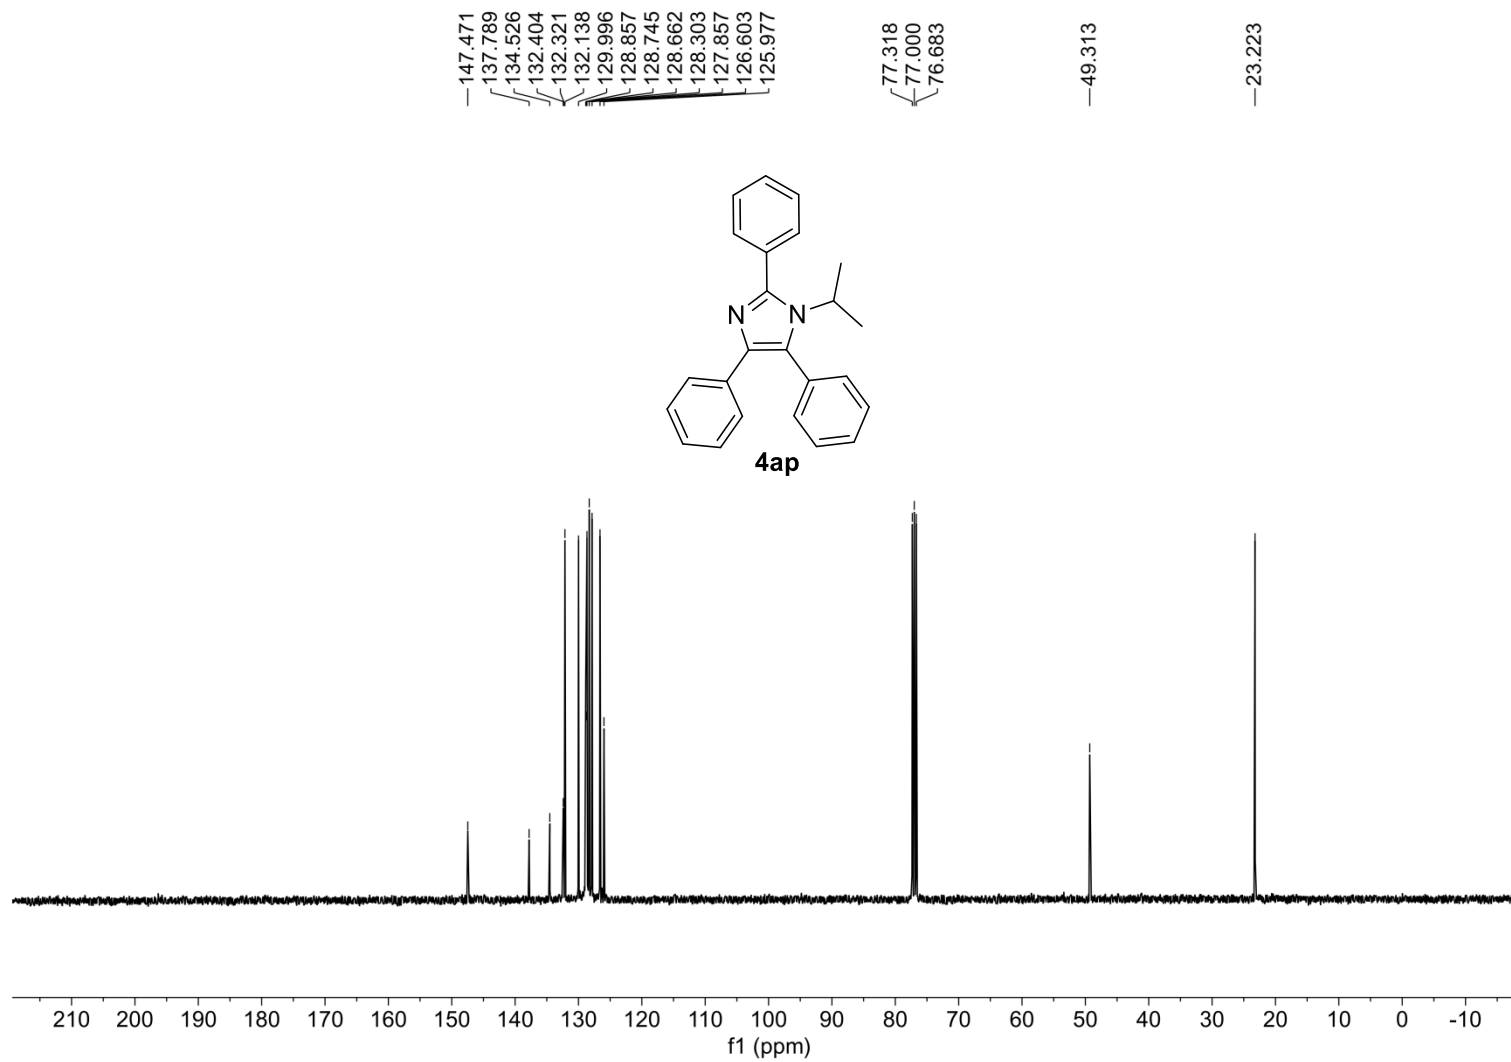

S118

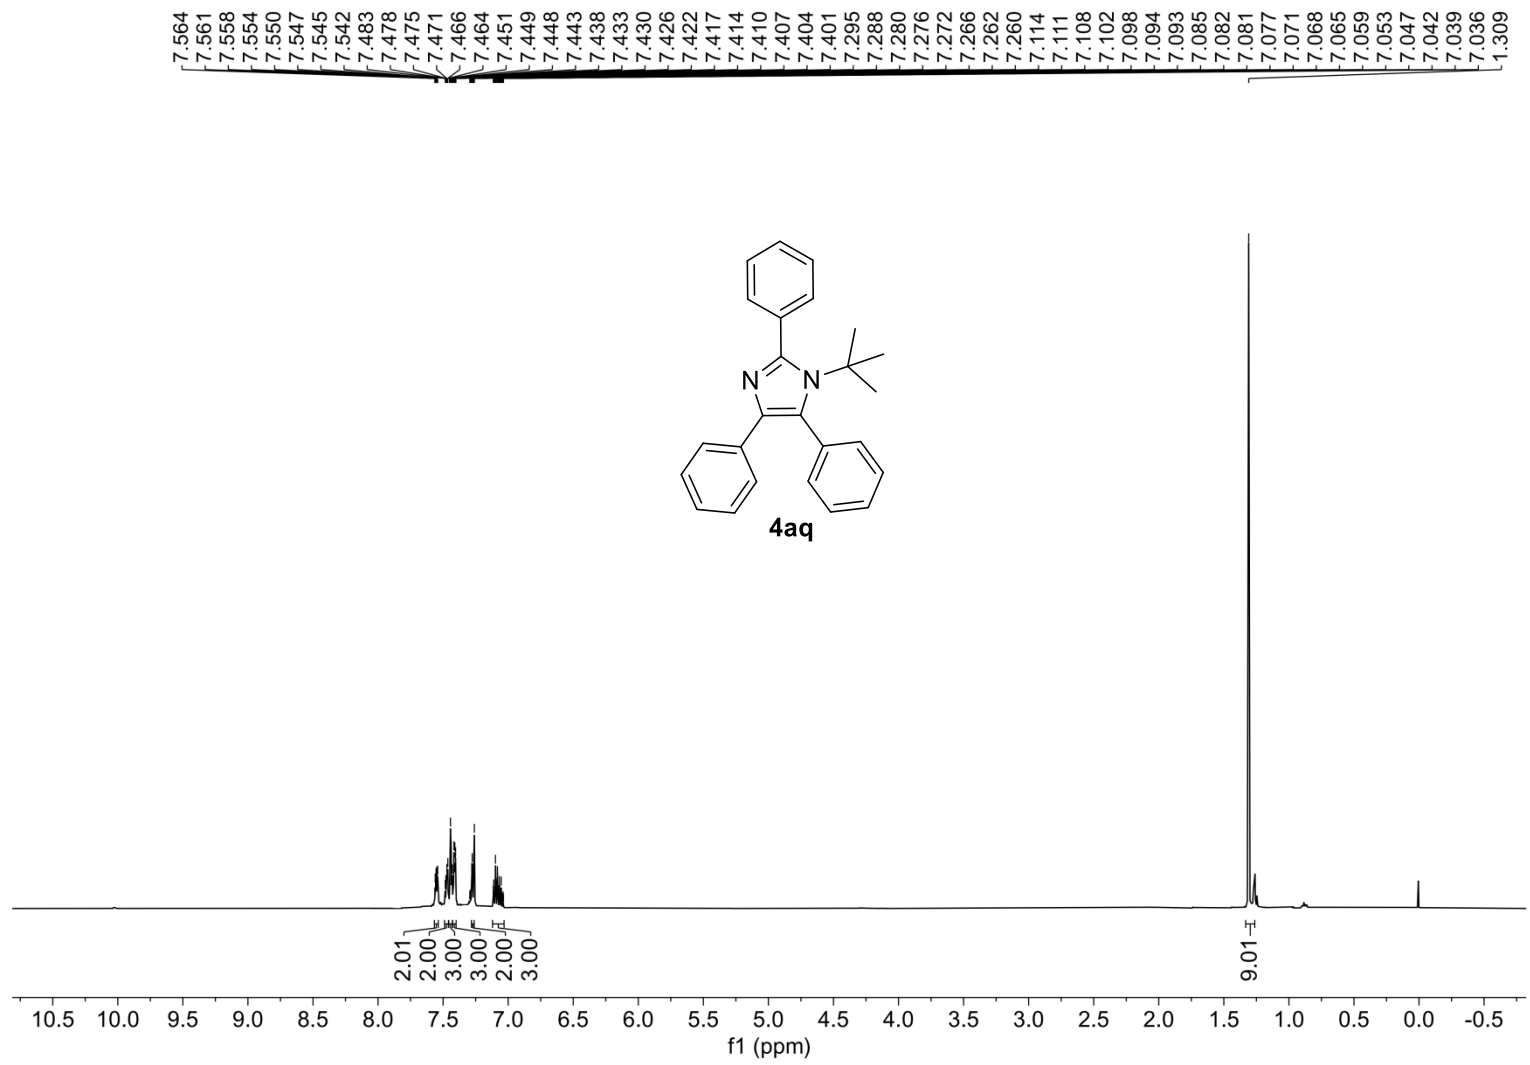

S119

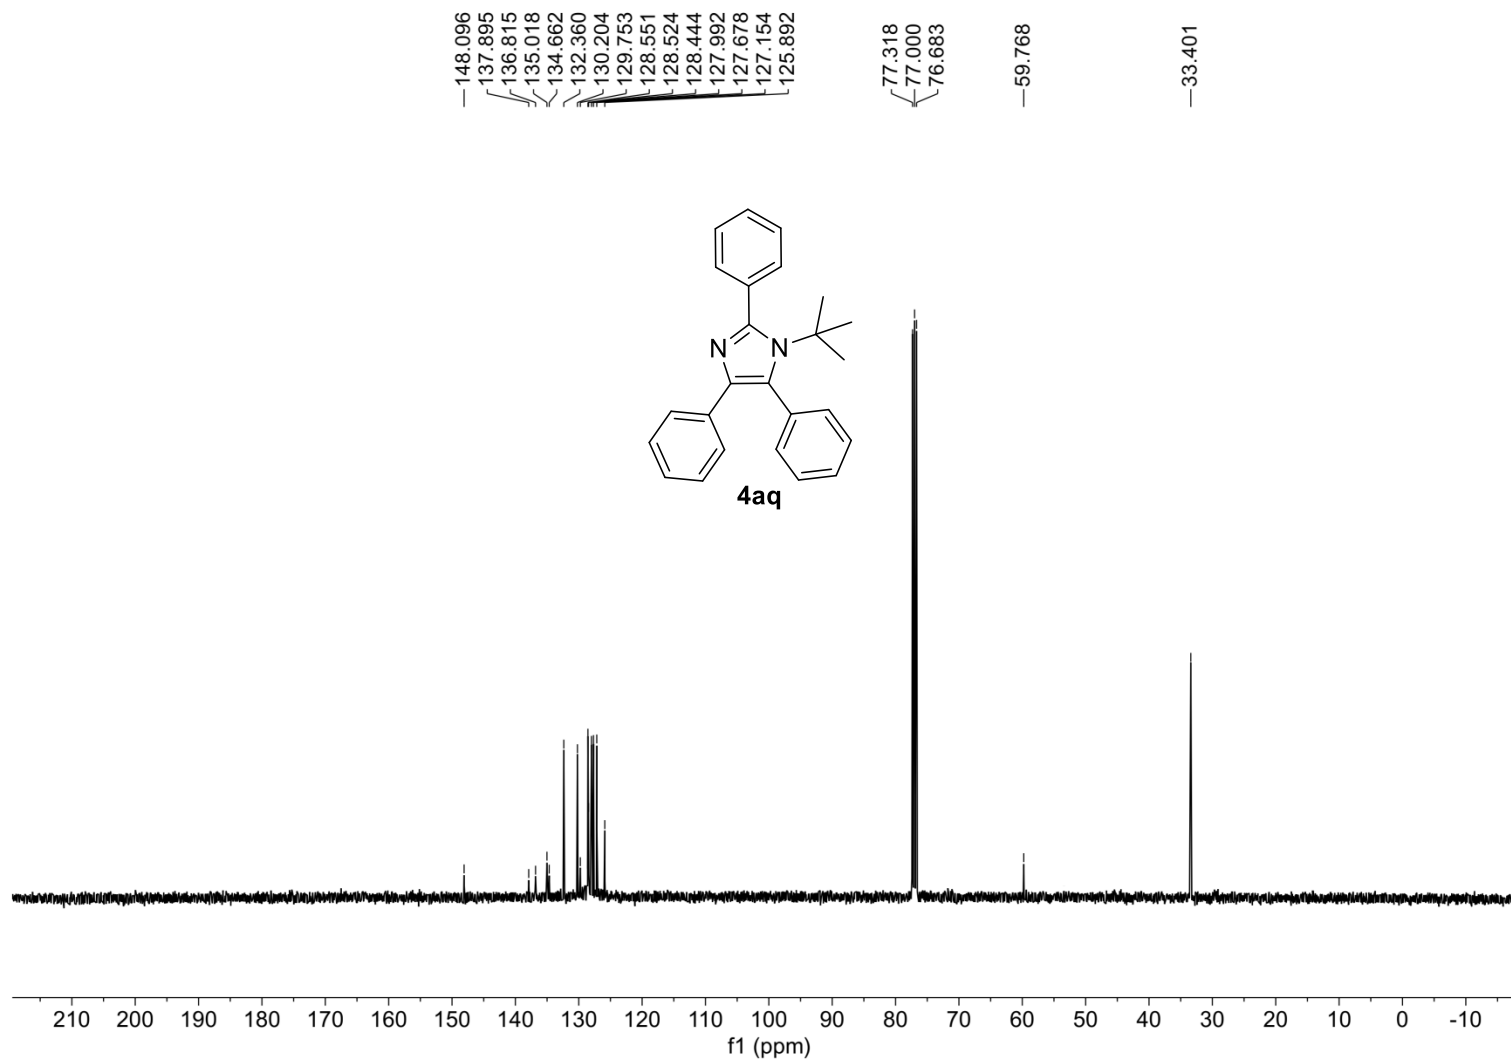

S120
